# Supplementary material for: Evolution of male pregnancy associated with remodeling of canonical vertebrate immunity in seahorses and pipefishes
Source: PubMed Central journal article supplement — Proc Natl Acad Sci U S A. 2020 Apr 13;117(17):9431–9. doi: 10.1073/pnas.1916251117 (PMC7196912; doi:10.1073/pnas.1916251117), 2020-04-13
Supplement: pnas.1916251117.sapp.pdf [file pnas.1916251117.sapp.pdf]

**Supporting Information:**

**Evolution of male pregnancy associated with remodelling of canonical vertebrate immunity in seahorses and pipefishes**

Olivia Roth<sup>1</sup>, Monica Hongrø Solbakken<sup>2</sup>, Ole Kristian Tørresen<sup>2</sup>, Till Bayer<sup>1</sup>, Michael Matschiner<sup>2,3</sup>, Helle Tessand Baalsrud<sup>2</sup>, Siv Nam Khang Hoff<sup>2</sup>, Marine Servane Ono Briec<sup>2</sup>, David Haase<sup>1</sup>, Reinhold Hanel<sup>4</sup>, Thorsten B.H. Reusch<sup>1,\*</sup> & Sissel Jentoft<sup>2,\*</sup>

- 1 GEOMAR Helmholtz Centre for Ocean Research Kiel, Marine Evolutionary Ecology, Düsternbrooker Weg 20, D-24105 Kiel, Germany
- 2 Centre for Ecological and Evolutionary Synthesis, Department of Biosciences, University of Oslo, Blindernveien 3, NO-0371 Oslo, Norway
- 3 Department of Palaeontology and Museum, University of Zürich, Karl-Schmid-Strasse 4, CH-8006 Zürich, Switzerland
- 4 Thünen Institute of Fisheries Ecology, Herwigstrasse 31, D-27572 Bremerhaven, Germany

\* equal contribution

corresponding author: Olivia Roth: [oroth@geomar.de](mailto:oroth@geomar.de)

## Table of contents

|                                                                                                                                                                             |    |
|-----------------------------------------------------------------------------------------------------------------------------------------------------------------------------|----|
| 1. Sample collection for Syngnathiformes genomes and DNA extraction .....                                                                                                   | 6  |
| 2. Syngnathiformes genomes .....                                                                                                                                            | 8  |
| 2.1. Fragmentation and Library preparation .....                                                                                                                            | 8  |
| 2.2. Genome Sequencing .....                                                                                                                                                | 8  |
| 2.3. Genome assemblies .....                                                                                                                                                | 8  |
| 2.4. Assembly of transcriptome for <i>Syngnathus typhle</i> .....                                                                                                           | 11 |
| 2.5. Annotation of the <i>Syngnathus typhle</i> genome .....                                                                                                                | 11 |
| 3. Syngnathiformes Phylogeny .....                                                                                                                                          | 11 |
| 3.1. Taxon selection and fossil calibration .....                                                                                                                           | 11 |
| 3.2. Selection of phylogenetic markers.....                                                                                                                                 | 12 |
| 3.3. Ortholog identification .....                                                                                                                                          | 12 |
| 3.4. Bayesian phylogenetic inference .....                                                                                                                                  | 12 |
| 3.5. Results Phylogeny .....                                                                                                                                                | 13 |
| 4. Genome size evolution .....                                                                                                                                              | 19 |
| 4.1. Optimal genome size evolution .....                                                                                                                                    | 19 |
| 4.2. Transposable elements .....                                                                                                                                            | 20 |
| 5. Gene mining and annotation .....                                                                                                                                         | 23 |
| 5.1. Ortholog search within the Syngnathiformes .....                                                                                                                       | 23 |
| 5.2. Gene alignments.....                                                                                                                                                   | 24 |
| 5.3. Gene trees .....                                                                                                                                                       | 25 |
| 5.4. Local gene synteny.....                                                                                                                                                | 25 |
| 5.5. Results of for candidate gene mining and annotation.....                                                                                                               | 26 |
| 5.5.1. Activation-induced cytidine deaminase ( <i>AID/AICDA</i> ) - loss of<br><i>AICDA</i> in <i>Syngnathus</i> .....                                                      | 26 |
| 5.5.2. T-cell surface glycoprotein Cluster of differentiation 4 ( <i>CD4</i> ) - loss<br>of <i>CD4</i> in <i>Syngnathus</i> .....                                           | 28 |
| 5.5.3. Class II Major histocompatibility complex transactivator ( <i>CIITA</i> ) -<br>lost in <i>Syngnathus</i> but also possible loss in <i>Fistularia tabacaria</i> ..... | 29 |
| 5.5.4. MHC II invariant chain ( <i>CD74</i> ) – sequence variation and exon loss<br>in <i>Hippocampus</i> and <i>Syngnathus</i> .....                                       | 30 |
| 5.5.5. Autoimmune regulator ( <i>51</i> ) - found in all species. Increased<br>sequence diversity in <i>Syngnathus</i> and <i>Hippocampus</i> . .....                       | 32 |
| 5.5.6. Beta-2-microglobulin ( <i>B2M</i> )– present in all species, copy number<br>variation 32                                                                             |    |
| 5.5.7. <i>CD8A/B</i> – <i>Syngnathus</i> and <i>Hippocampus</i> only have <i>CD8A</i> .....                                                                                 | 33 |

|         |                                                                                                               |     |
|---------|---------------------------------------------------------------------------------------------------------------|-----|
| 5.5.8.  | Major Histocompatibility Complex I ( <i>MHC I</i> ) .....                                                     | 34  |
| 5.5.9.  | Major Histocompatibility Complex II ( <i>MHC II</i> ) .....                                                   | 35  |
| 5.5.10. | MHC class IIB analysis in Hippocampus .....                                                                   | 36  |
| 5.5.11. | MHC II synteny.....                                                                                           | 41  |
| 5.5.12. | Recombination activating gene 1 and 2 ( <i>RAG1</i> and <i>RAG2</i> ).....                                    | 41  |
| 5.5.13. | Transporter 1 and 2 ATP binding cassette subfamily B member<br>( <i>TAP1</i> and <i>TAP2</i> ) .....          | 42  |
| 6.      | Detection of positive selection across Syngnathiformes.....                                                   | 42  |
| 6.1.    | Assess positive selection in pregnancy and immune genes.....                                                  | 42  |
| 6.2.    | Signs of positive selection on immune system genes in syngnathids....                                         | 46  |
| 6.3.    | Pregnancy genes and signs of positive selection .....                                                         | 47  |
| 6.4.    | Oxygen transport and Hemoglobin genes ( <i>Hb</i> ).....                                                      | 48  |
| 7.      | Differential gene expression (transcriptome sequencing) in <i>S. typhle</i> .....                             | 53  |
| 7.1.    | Sampling and experimental design, RNA extraction, Sequencing.....                                             | 53  |
| 7.2.    | Differential gene expression analysis <i>Syngnathus typhle</i> .....                                          | 53  |
| 7.3.    | Convergent evolution of female and male pregnancy .....                                                       | 54  |
| 7.3.1.  | Genes of the immune system.....                                                                               | 55  |
| 7.3.2.  | Expression patterns of prostaglandin, progesterone, and the<br>estrogen pathway.....                          | 57  |
| 7.3.3.  | Parent – fetus transport.....                                                                                 | 58  |
| 7.3.4.  | mTor pathway and implantation .....                                                                           | 59  |
| 7.3.5.  | Endometrium and placenta development .....                                                                    | 60  |
| 7.4.    | Gene co-option for male pregnancy in <i>Syngnathus typhle</i> .....                                           | 60  |
| 7.4.1.  | Genes of the immune system.....                                                                               | 61  |
| 7.4.2.  | Genes involved in developmental processes .....                                                               | 62  |
| 7.5.    | Gene expression during pregnancy, comparison <i>Syngnathus typhle</i> vs.<br><i>Syngnathus scovelli</i> ..... | 77  |
| 8.      | SI Appendix Data Set 1 .....                                                                                  | 85  |
| 9.      | SI Appendix Data Set 2 .....                                                                                  | 86  |
| 10.     | SI Appendix Data Set 3 .....                                                                                  | 100 |
|         | References .....                                                                                              | 106 |

## Table of tables

|                                                                                                                                                                                                             |    |
|-------------------------------------------------------------------------------------------------------------------------------------------------------------------------------------------------------------|----|
| SI Appendix Table S1: Origin of samples.....                                                                                                                                                                | 10 |
| SI Appendix Table S2: Summary statistics for the different genome assemblies                                                                                                                                | 13 |
| SI Appendix Table S3: Genome assemblies used for phylogenomic inference .....                                                                                                                               | 18 |
| SI Appendix Table S4: Overview of genome sizes and the repetitive elements of the Syngnathiformes species. ....                                                                                             | 25 |
| SI Appendix Table S5: Immune, pregnancy and hemoglobin genes .....                                                                                                                                          | 26 |
| SI Appendix Table S6: Genome assembly localization of <i>AICDA</i> .....                                                                                                                                    | 30 |
| SI Appendix Table S7: Localization of <i>CD4</i> .....                                                                                                                                                      | 32 |
| SI Appendix Table S8: Genome assembly localization of <i>CIITA</i> .....                                                                                                                                    | 33 |
| SI Appendix Table S9: Number of detected <i>MHC I</i> fragments in the different assemblies.....                                                                                                            | 38 |
| SI Appendix Table S10: <i>MHC II</i> fragments detected in the genome assemblies...                                                                                                                         | 40 |
| SI Appendix Table S11: Summary of the results of the tests for positive selection .....                                                                                                                     | 47 |
| SI Appendix Table S12: Genes with a function in mammalian (M), reptile (R) or seahorse (S) pregnancy that were differentially expressed during pipefish brood pouch development or pipefish pregnancy ..... | 67 |
| SI Appendix Table S13: The genes with most expression changes during pipefish brood pouch development or pipefish pregnancy .....                                                                           | 72 |
| SI Appendix Table S14: Genes with expression changes both during pregnancy of <i>S. typhle</i> (1) and <i>S. scovelli</i> (SSC).....                                                                        | 82 |

## Table of figures

|                                                                                                                                         |    |
|-----------------------------------------------------------------------------------------------------------------------------------------|----|
| SI Appendix Figure S1: Time-calibrated phylogeny based on genome assemblies of 70 teleost species and <i>Lepisosteus oculatus</i> ..... | 22 |
| SI Appendix Figure S2: Ancestor reconstruction of genome size. ....                                                                     | 24 |
| SI Appendix Figure S3: Local gene synteny of the <i>AICDA</i> region .....                                                              | 31 |
| SI Appendix Figure S4: Local gene synteny of the <i>CD4</i> region .....                                                                | 32 |
| SI Appendix Figure S5: Local gene synteny of the <i>CIITA</i> region .....                                                              | 34 |
| SI Appendix Figure S6: Alignment of <i>CD74</i> in all species contrasted with sequences from Ensembl .....                             | 36 |
| SI Appendix Figure S7: Maximum likelihood tree of the <i>B2M</i> gene .....                                                             | 37 |
| SI Appendix Figure S8: Maximum likelihood tree of the <i>CD8A/B</i> gene .....                                                          | 38 |
| SI Appendix Figure S9: Maximum likelihood phylogeny of exon 4 of the <i>MHC I</i> gene, first half of the exon .....                    | 42 |
| SI Appendix Figure S10: Maximum likelihood phylogeny of exon 4 of the <i>MHC I</i> gene, second half of the exon .....                  | 43 |
| SI Appendix Figure S11: Maximum likelihood phylogeny of exon 4 of the <i>MHC II</i> gene, first half of the exon .....                  | 44 |
| SI Appendix Figure S12: Maximum likelihood phylogeny of exon 4 of the <i>MHC II</i> gene, second half of the exon .....                 | 44 |
| SI Appendix Figure S13: <i>MHC II</i> synteny .....                                                                                     | 45 |
| SI Appendix Figure S14: Overview of hemoglobin repertoire in Syngnathiformes .....                                                      | 54 |
| SI Appendix Figure S15: Phylogenetic tree of <i>beta-globin</i> genes .....                                                             | 55 |
| SI Appendix Figure S16: Phylogenetic tree of <i>alpha-globin</i> genes .....                                                            | 56 |

## Table of SI Appendix Data Sets

|                                                                                                 |     |
|-------------------------------------------------------------------------------------------------|-----|
| <b>SI Appendix Data Set 1:</b> Gene alignments in FASTA format.....pdf                          | 86  |
| <b>SI Appendix Data Set 2:</b> Details on the selected taxon set for phylogenetic analyses..... | 86  |
| <b>SI Appendix Data Set 3:</b> Gene trees used for the tests for positive selection.....        | 100 |

## **1. Sample collection for Syngnathiformes genomes and DNA extraction**

Syngnathiformes specimens were collected nearshore with handnets or at local fish markets in Germany, France, Cape Verde and Indonesia, or in the Eastern Atlantic off Angola aboard RV Dr. Fridtjof Nansen and off Madeira aboard RV Walther Herwig III between the years 2002 and 2014. A detailed list of sampling location for each specimen can be found in SI Appendix Table S1. Muscle tissues were stored at 4°C in 96 % ethanol before DNA extraction. Genomic DNA was extracted using the “High salt DNA extraction” method according to Phill Watts (<https://www.liverpool.ac.uk/~kempsi/IsolationofDNA.pdf>).

**SI Appendix Table S1: Origin of samples used for genome sequencing, reproduction strategies and sex roles of each species.**

| <b>species</b>                     | <b>sampling location</b>                                                                  | <b>sampling date</b> | <b>sex roles</b>         | <b>development</b>            |
|------------------------------------|-------------------------------------------------------------------------------------------|----------------------|--------------------------|-------------------------------|
| <i>Aeoliscus strigatus</i>         | Kepulauan Seribu, Java Sea, Indonesia: 5°37'S/106°35'E                                    | 14.08.12             | conventional             | pelagic eggs and larvae       |
| <i>Dactylopterus volitans</i>      | Calvi, Mediterranean Sea, France: 42°33'35"N/8°43'39"E                                    | 03.09.02             | conventional             | pelagic eggs and larvae       |
| <i>Doryrhamphus dactyliophorus</i> | Kepulauan Seribu, Java Sea, Indonesia: 5°37'S/106°35'E                                    | 14.08.12             | sex-role reversed        | male pregnancy, trunk brooder |
| <i>Entelurus aequoreus</i>         | <i>RV Walther Herwig III</i> , Central Eastern Atlantic, Portugal: 42°22'84"N/012°35'18"W | 03.03.10             | sex-role reversed        | male pregnancy, trunk brooder |
| <i>Fistularia tabacaria</i>        | <i>RV Dr Fridtjof Nansen</i> , Central Eastern Atlantic, Angola: 09°27'S/13°04'E          | 16.03.03             | conventional             | pelagic eggs and larvae       |
| <i>Hippocampus whitei</i>          | Kepulauan Seribu, Java Sea, Indonesia: 5°37'S/106°35'E                                    | 14.08.12             | conventional, monogamous | male pregnancy, tail brooder  |
| <i>Hippocampus comes</i>           | ref(2)                                                                                    |                      | conventional, monogamous | male pregnancy, tail brooder  |
| <i>Hippocampus kuda</i>            | Kepulauan Seribu, Java Sea, Indonesia: 5°37'S/106°35'E                                    | 14.08.12             | conventional, monogamous | male pregnancy, tail brooder  |
| <i>Macoramphosus scolopax</i>      | <i>RV L'Europe</i> , Mediterranean Sea, France: 42°34'12"N/3°32'24"E                      | 23.06.13             | conventional             | pelagic eggs and larvae       |
| <i>Mullus surmuletus</i>           | Calvi, Mediterranean Sea, France: 42°34'48"N/8°43'28"E                                    | 03.09.12             | conventional             | pelagic eggs and larvae       |
| <i>Nerophis ophidion</i>           | Strande, Baltic Sea, Germany : 54°25'54" N/ 10°10'15" E                                   | 16.06.13             | sex-role reversed        | male pregnancy, trunk brooder |
| <i>Syngnathus rostellatus</i>      | Strande, Baltic Sea, Germany : 54°25'54" N/ 10°10'15" E                                   | 16.06.13             | sex-role reversed        | male pregnancy, tail brooder  |
| <i>Syngnathus scovelli</i>         | ref(3)                                                                                    |                      | sex-role reversed        | male pregnancy, tail brooder  |
| <i>Syngnathus typhle</i>           | Strande, Baltic Sea, Germany : 54°25'54" N/ 10°10'15" E                                   | 16.06.13             | sex-role reversed        | male pregnancy, tail brooder  |

## 2. Syngnathiformes genomes

### 2.1. Fragmentation and Library preparation

Genomic DNA concentration was standardized to 50ng  $\mu\text{l}^{-1}$  with Qiagen Elution Buffer if necessary and subjected to sonication (Covaris S220, Life Technologies) to obtain DNA fragments of a mean length of 300 bp using the following settings: 200 cycles for 90s with w-peak at 105. All sequencing libraries were constructed following the Illumina TruSeq Sample Prep v2 low-Throughput Protocol according to manufacturer's instructions (Illumina).

### 2.2. Genome Sequencing

For *Syngnathus typhle* we made a high coverage and contiguous reference genome. To do so, two paired end libraries (180 bp and 300 bp insert size, 100 bp read length) were sequenced on the Illumina platform using HiSeq 2000 instruments at the Norwegian Sequencing Centre at the University of Oslo (<http://www.sequencing.uio.no>). In addition, an 8 kbp mate pair library using a 454 paired end approach was created and sequenced on the HiSeq 2000 instrument. The 3 kbp and 10 kbp Illumina mate pair libraries were sequenced at Genome Quebec at McGill University (<http://www.genomequebec.com/en/home.html>). The other 11 Syngnathiformes genomes were sequenced using a single library of 300-600 bp insert size for the different species, following the procedure outlined in refs(4, 5) with 150 bp read lengths.

### 2.3. Genome assemblies

For our main model species, *Syngnathus typhle*, the assembly strategy followed the recommended sequencing dataset for ALLPATHS-LG(6) using version R42780. First, any adapter sequences in the reads were removed with cutadapt(7) version 1.2.1, before assembly was performed. The 180 bp insert size library was used as the fragment library (used in the initial construction of unipaths), and all the other libraries were used as "jumping" libraries (used to expand unipaths and scaffold). *S. typhle* was assembled based on 35 Gbp of the 180 bp insert size library, 37 Gbp of the 300 bp insert size library, 62 Gbp of the 3 kbp insert size library, 31 Gbp of the 8 kbp library and 15 Gbp of the 10 kbp library.



The assemblies for all other Syngnathiformes species were performed as described in ref(5), but using Celera Assembler(8) version 8.3rc2 (ref(8)). In brief, reads were error-corrected and trimmed for adapters with merTrim from the Celera Assembler software using a *k*-mer size of 22 and Illumina adapters as options. Celera Assembler was run with the following options: merThreshold=0, merDistinct=0.9995, merTotal=0.995, unitigger=bogart, doOBT=0, doToggle=0; default settings were used for all other parameters. In addition, PreQC was run on the sequencing reads to estimate genome size(9). Each assembly based on one sequencing library for each species of approximately 350 bp insert size and 150 bp long reads (SI Appendix Table S2).

In order to assess the completeness of the genome assemblies, we run CEGMA v2.4.010312 (ref(10, 11)) and BUSCO v2.0 (ref(12)) with an actinopterygii standardized eukaryotic gene set. Basic statistics such as N50 contig and scaffold lengths were provided by the assemblathon\_stats.pl script from Assemblathon 2 (ref(13)).

As expected, because of the long insert size libraries of *S. typhle*, the N50 scaffold lengths are much longer than those of the other species (3 Mbp). *Doryramphus dactylophorus* is the only species with longer contigs than *S. typhle*. We ran BUSCO(12) to validate the correctness of the genome assemblies. *Nerophis ophidion* and *Entelurus aequoreus* have much larger genomes than the other species, and their genome assemblies are fragmented compared to the other species, with only 33.6 and 21.6 percentage of complete BUSCO genes found respectively. The other species range from 73.8 (*Mullus surmuletus*) to 93.9 (*S. typhle*) percentage complete BUSCO genes found. This implies that the results in terms of the gene repertoire in *N. ophidion* and *E. aequoreus* need to be treated with caution.

**SI Appendix Table S2: Summary statistics for the different genome assemblies. Genome sizes were estimated based on statistics from PreQC, sequencing coverage are sequencing reads in bp divided by estimated genome size. Assembly size is the actual size of the assembly using coverage as denominator. The BUSCO scores are divided into categories of complete, fragmented and missing genes.**

| Species                          | Estimated genome size inMbp (EGS) | Sequencing coverage based on EGS | Assembly size in Mbp (AS) | Sequencing coverage based on AS | N50 scaffold (bp) | N50 contig (bp) | BUSCO complete (percentage) | BUSCO fragmented (percentage) | BUSCO missing (percentage) |
|----------------------------------|-----------------------------------|----------------------------------|---------------------------|---------------------------------|-------------------|-----------------|-----------------------------|-------------------------------|----------------------------|
| <i>Aeoliscus strigatus</i>       | 403                               | 58.6                             | 381                       | 62.0                            | 115785            | 15935           | 93.5                        | 3.8                           | 2.7                        |
| <i>Macroramphorus scolopax</i>   | 507                               | 36.4                             | 417                       | 44.2                            | 41786             | 13365           | 89.8                        | 6.0                           | 4.3                        |
| <i>Mullus surmuletus</i>         | 569                               | 33.5                             | 469                       | 40.7                            | 17184             | 7238            | 73.8                        | 14.9                          | 11.2                       |
| <i>Dactylopterus volitans</i>    | 498                               | 33.7                             | 577                       | 29.1                            | 17099             | 8271            | 74.1                        | 13.6                          | 12.3                       |
| <i>Fistularia tabacaria</i>      | 762                               | 29.5                             | 593                       | 38.0                            | 107234            | 17669           | 90.8                        | 5.5                           | 3.6                        |
| <i>Doryramphus dactylophorus</i> | 651                               | 31.3                             | 619                       | 32.9                            | 75189             | 27594           | 87.1                        | 7.8                           | 5.1                        |
| <i>Syngnathus rostellatus</i>    | 347                               | 55.0                             | 283                       | 67.5                            | 87573             | 14947           | 89.0                        | 5.9                           | 5.1                        |
| <i>Syngnathus typhle</i>         | NA                                | NA                               | 315                       | 578.4                           | 3046963           | 25809           | 93.9                        | 3.1                           | 3.0                        |
| <i>Hippocampus kuda</i>          | 478                               | 39.4                             | 445                       | 42.4                            | 31191             | 10411           | 83.9                        | 8.8                           | 7.3                        |
| <i>Hippocampus whitei</i>        | 461                               | 40.1                             | 433                       | 42.8                            | 40759             | 10333           | 86.0                        | 7.6                           | 6.4                        |
| <i>Nerophis ophidion</i>         | 1581                              | 13.1                             | 976                       | 21.2                            | 6841              | 5245            | 33.6                        | 25.6                          | 40.8                       |
| <i>Entelurus aequoreus</i>       | 1834                              | 34.4                             | 557                       | 113.2                           | 3916              | 3393            | 21.6                        | 27.1                          | 51.3                       |

#### 2.4. Assembly of transcriptome for *Syngnathus typhle*

We used reference transcriptomes to aid the gene annotation of the *S. typhle* genome. Details on how transcriptomes were sequenced and analysed can be found under 7.1. To remove TruSeq Adapters RNA-seq reads were trimmed with cutadapt 1.5 at a quality threshold of Phred  $\geq 20$ . The trimmed reads were then assembled with Trinity r20140717 (ref(14)).

#### 2.5. Annotation of the *Syngnathus typhle* genome

Two different *ab initio* gene predictors were trained. GeneMark-ES v2.3e (ref(15)) on the genome assembly and SNAP v20131129 (ref(16)) on the genes found by CEGMA. MAKER v2.31 (refs(17, 18)) used the trained gene predictors, the Trinity transcriptome assembly, all repeats in RepBase(19) as called by MAKER and proteins from UniProtKB/SwissProt r2014\_9 (ref(20)) for a first pass annotation of the genome assembly(21). The result of the first pass was used to retrain SNAP and train AUGUSTUS v3.0.2 (ref(22)) and a second iteration was performed using the same set-up. The protein sequences from final output of MAKER were BLASTed against the UniProtKB/SwissProt proteins and InterProScan v5.4-47 (ref(23)) was used to classify protein domains in the protein sequences. This information was transferred to all output of MAKER. This annotated 19,668 gene models. InterProScan(23) was run on the predicted proteins of these and gene names were allocated based on match with proteins in UniProt/SwissProt.

### 3. Syngnathiformes Phylogeny

#### 3.1. Taxon selection and fossil calibration

To generate a time-calibrated phylogeny of Syngnathiformes, we compiled a genomic dataset that also included multiple representatives of diverse outgroup lineages, which allowed us to calibrate divergence times with a large number of fossil constraints. This dataset includes genome assemblies of 14 representatives of Syngnathiformes from which 12 are newly sequenced (this study), and the genome assemblies of *Syngnathus scovelli*, and *Hippocampus comes* were taken from ref(3) and ref(2) respectively. Moreover, 56 genome assemblies of non-Syngnathiformes species from 36 different teleost orders (SI Appendix Table S3) and *Lepisosteus oculatus* as an outgroup were included(24). For details, see

SI Appendix Data Set 2.

### 3.2. Selection of phylogenetic markers

To identify a set of orthologous markers for phylogenetic inference, we followed the analysis pipeline described in ref(4) with minor updates and modifications. The initial unfiltered set of markers included all 32,266 annotated zebrafish genes of release 87 of the ENSEMBL database(25). As in ref(4), we excluded genes that had less than five exons with a length of at least 150 bp, genes that could not be assigned to an ENSEMBL gene tree, or genes for which teleost fishes did not form a monophyletic group in the ENSEMBL gene tree. We also excluded all genes for which duplicates were present or homologs were missing in one or more of the ENSEMBL data sets of the eight species zebrafish (*Danio rerio*), cave fish (*Astyanax mexicanus*), cod (*Gadus morhua*), stickleback (*Gasterosteus aculeatus*), tilapia (*Oreochromis niloticus*), medaka (*Oryzias latipes*), fugu (*Takifugu rubripes*), and Amazon molly (*Poecilia formosa*). Using the same approach as in ref(4), we also removed exons sequences for which the tblastn bitscore(26) among known orthologs in the eight species was not at least 1.5 times as high as the highest bitscore with a potential paralog. After these filtering steps, 3,061 exons of 382 genes remained as queries for the identification of orthologs from all 71 assemblies.

### 3.3. Ortholog identification

Each of the 3,061 exons was used as a query in tblastn searches against each of the 71 assemblies to identify putative orthologs. Hits were filtered by exon-specific bitscore thresholds as described in ref(4). Furthermore, exon sequences were excluded if pairwise dN/dS ratios with the orthologous zebrafish sequence were greater than 0.25. We also removed unreliably aligned codons, all third codon positions, as well as exon alignments with (i) GC-content standard deviation above 0.05 (ref(27)) length shorter than 120 bp, or (iii) more than 10 missing sequences. We further filtered genes by exon tree congruence and clock-like evolution as described in ref(4). Based on this strict filtering procedure, we identified a set of 138 genes with a total alignment length of 108,372 bp and an overall proportion of missing data of 6.8%.

### 3.4. Bayesian phylogenetic inference

Phylogenetic clade support and divergence times were estimated in two separate

sets of Bayesian analyses with the software BEAST2 v.2.4.5 (ref(28)). As in ref(4), the first round of analyses was conducted to assess node support throughout the phylogeny; thus no topology or time constraints were applied except a single constraint on the root age, which was arbitrarily placed at 320 Ma. Fossil constraints, coupled with monophyly constraints on the respective clades, were then used in the second set of analyses to estimate the timeline of diversification in Syngnathiformes. All fossil constraints were applied with the CladeAge(29) package for BEAST2, with model parameters set as described in ref(30). Following ref(29), we identified the oldest fossil records of morphologically recognizable clades within our taxon set, resulting in 34 fossil constraints as listed below (1.3.4.). For each of the two sets of BEAST2 analyses, three replicate runs were performed, each with a chain length of 800 million MCMC generations of which the first 10% were discarded as burn-in. Maximum Clade Credibility (MCC) summary trees were produced with TreeAnnotator v.2.2.0.

### 3.5. Results Phylogeny

BEAST2 analyses based on 138 concatenated genes resulted in a strongly supported species tree consistent with recent phylogenomic studies(31) (SI Appendix Figure S1). All nodes received full support (BPP 1.0) except for the monophyly of Eurypterygia (combining Aulopiformes with Ctenosquamata within Neoteleostei<sup>57</sup>), which was supported by BPP 0.85. The monophyly of Eurypterygia, however, is not controversial as it has been supported by previous phylogenies(24, 31-33) as well as morphological synapomorphies(31). In agreement with other recent studies(24, 34), our phylogeny supports a sister group relationship between Scombriformes (tunas, mackerels, butterfishes, etc.) and Syngnathiformes. Within Syngnathiformes, we recover the monophyly of the families Syngnathidae (represented in our taxon set by nine species) and Centriscidae (represented by *Macroramphosus scolopax* and *Aeoliscus strigatus*) as well as the subfamilies Syngnathinae and Nerophinae (both represented by three species) as proposed in ref(35). We further find strong support for the suborder Syngnathoidi as defined in ref(31), represented in our phylogeny by members of three out of its five families (Syngnathidae, Fistulariidae, and Centriscidae; Aulostomidae and Solenostomidae were not analyzed). The suborders Dactylopteroidei and Mulloidei appear as sister taxa in our phylogeny;

however, both could be more closely related to the fourth syngnathiform suborder Callionymoidei(31), which is not represented in our phylogeny.

The timeline of species diversification estimated in the second set of our BEAST2 analyses based on 34 fossil constraints is highly congruent with the fossil record. At the root of the tree, the estimated time of divergence between Teleostei and Holostei predates the earliest record of Holostei ( $\dagger$ *Acentrophorus varians*, 259.8-254.1 Ma; see above) by no more than 16 myr (269.9 Ma; 95% HPD 289.1-255.3 Ma). Acanthomorph fishes began to diversify around 124.1 Ma (95% HPD 133.2-115.6 Ma), and Syngnathiformes diverged from Scombriformes around 80.5 Ma (95% HPD 90.4-71.2 Ma) according to our estimated timeline. Thus, the age estimate for Acanthomorphata predates the earliest acanthomorph crown fossils (e.g.,  $\dagger$ *Xenyllion zonensis*, 113.0-97.5 Ma; see above) by  $\leq 27$  myr, and the estimate for the origin of Syngnathiformes overlaps with the age of the earliest record assigned to Syngnathiformes ( $\dagger$ *Gasterorhamphosus zuppichinii*, 89.8-82.0 Ma), which was not used for calibration as morphological synapomorphies are not known for the order(31). The divergence of the syngnathiform suborders Syngnathoidei, Dactylopteroidei, and Mulloidei is estimated between 73.5 Ma (95% HPD 82.9-62.8 Ma) and 62.0 Ma (95% HPD 77.4-44.8 Ma). Within Syngnathoidei, the families Centriscidae, Fistulariidae, and Syngnathidae diverged between 69.6 Ma (95% HPD 79.9-58.9 Ma) and 64.3 Ma (95% HPD 75.2-53.9 Ma), during a time that more generally seemed to promote explosive diversification of marine fishes(34). Finally, the two syngnathid subfamilies Syngnathinae and Nerophinae diverged around 49.9 Ma (95% HPD 60.2-39.1 Ma), predating the earliest fossil records of both groups ( $\dagger$ *Syngnathus incompletus* and  $\dagger$ *Hipposyngnathus neriticus*, 32.9-29.7 Ma) by approximately 20 myr.

**SI Appendix Table S3: Genome assemblies used for phylogenomic inference. Unless specified otherwise, NCBI accessions are given. Taxonomic classification follows ref(31)**

| <b>Species</b>                   | <b>Family</b>     | <b>Order</b>          | <b>Group</b>                     | <b>Accession / Link</b> |
|----------------------------------|-------------------|-----------------------|----------------------------------|-------------------------|
| <i>Regalecus glesne</i>          | Regalecidae       | Lampriformes          | Division Lampripterygii          | GCA_900302585.1         |
| <i>Lampris guttatus</i>          | Lampridae         | Lampriformes          | Division Lampripterygii          | GCA_900302545.1         |
| <i>Polymixia japonica</i>        | Polymixiidae      | Polymixiiformes       | Division Polymixiipterygii       | GCA_900302305.1         |
| <i>Guentherus altivela</i>       | Ateleopodidae     | Ateleopodiformes      | Infracohort Ateleopodia          | GCA_900312595.1         |
| <i>Thunnus albacares</i>         | Scombridae        | Scombriformes         | Series Pelagiaria                | GCA_900302625.1         |
| <i>Parasudis fraserbrunneri</i>  | Chlorophthalmidae | Aulopiformes          | Section Cyclosquamata            | GCA_900302295.1         |
| <i>Chatrabus melanurus</i>       | Batrachoididae    | Batrachoidiformes     | Series Batrachoidaria            | GCA_900302635.1         |
| <i>Lesueurigobius cf. sanzoi</i> | Gobiidae          | Gobiiformes           | Series Gobiaria                  | GCA_900303255.1         |
| <i>Brotula barbata</i>           | Ophidiidae        | Ophidiiformes         | Series Ophidiaria                | GCA_900303265.1         |
| <i>Carapus acus</i>              | Ophidiidae        | Ophidiiformes         | Series Ophidiaria                | GCA_900312935.1         |
| <i>Symphodus melops</i>          | Labridae          | Labriformes           | Series Eupercaria                | GCA_900323315.1         |
| <i>Percopsis transmontana</i>    | Percopsidae       | Percopsiformes        | Series Percopsaria               | GCA_900302285.1         |
| <i>Typhlichthys subterraneus</i> | Amblyopsidae      | Percopsiformes        | Series Percopsaria               | GCA_900302405.1         |
| <i>Bathygadus melanobranchus</i> | Gadidae           | Gadiformes            | Subseries Gadariae               | GCA_900302375.1         |
| <i>Zeus faber</i>                | Zeidae            | Zeiformes             | Subseries Zeiariae               | GCA_900323335.1         |
| <i>Cyttopsis roseus</i>          | Parazenidae       | Zeiformes             | Subseries Zeiariae               | GCA_900302355.1         |
| <i>Stylephorus chordatus</i>     | Stylephoridae     | Stylephoriformes      | Subseries Gadariae               | GCA_900312615.1         |
| <i>Osmerus eperlanus</i>         | Osmeridae         | Osmeriformes          | Subcohort Stomiati               | GCA_900302275.1         |
| <i>Borostomias antarcticus</i>   | Stomiidae         | Stomiatiiformes       | Subcohort Stomiati               | GCA_900323325.1         |
| <i>Beryx splendens</i>           | Berycidae         | Beryciformes          | Subdivision Berycimorphaceae     | GCA_900312565.1         |
| <i>Acanthochaenus luetkenii</i>  | Stephanoberycidae | Beryciformes          | Subdivision Berycimorphaceae     | GCA_900312575.1         |
| <i>Myripristis jacobus</i>       | Holocentridae     | Holocentriformes      | Subdivision Holocentrimorphaceae | GCA_900302555.1         |
| <i>Holocentrus rufus</i>         | Holocentridae     | Holocentriformes      | Subdivision Holocentrimorphaceae | GCA_900302615.1         |
| <i>Benthoosema glaciale</i>      | Myctophidae       | Myctophiformes        | Subsection Myctophata            | GCA_900323375.1         |
| <i>Anabas testudineus</i>        | Anabantidae       | Anabantiformes        | Series Anabantaria               | GCA_900302665.1         |
| <i>Chromis chromis</i>           | Pomacentridae     | <i>incertae sedis</i> | Series Ovalentaria               | GCA_900302755.1         |
| <i>Pseudochromis fuscus</i>      | Pseudochromidae   | <i>incertae sedis</i> | Series Ovalentaria               | GCA_900323345.1         |
| <i>Lepisosteus oculatus</i>      | Lepisosteidae     | Lepisosteiformes      | Infraclass Holostei              | LepOcu1 (ENSEMBL 87)    |
| <i>Takifugu rubripes</i>         | Tetraodontidae    | Tetraodontiformes     | Series Eupercaria                | FUGU4 (ENSEMBL 87)      |

|                                    |                  |                    |                               |                                                                                                                                                                                   |
|------------------------------------|------------------|--------------------|-------------------------------|-----------------------------------------------------------------------------------------------------------------------------------------------------------------------------------|
| <i>Astyanax mexicanus</i>          | Characidae       | Characiformes      | Cohort Otomorpha              | AstMex102 (ENSEMBL 87)                                                                                                                                                            |
| <i>Danio rerio</i>                 | Danionidae       | Cypriniformes      | Cohort Otomorpha              | GRCz10 (ENSEMBL 87)                                                                                                                                                               |
| <i>Oryzias latipes</i>             | Adrianichthyidae | Beloniformes       | Series Ovalentaria            | MEDAKA1 (ENSEMBL 87)                                                                                                                                                              |
| <i>Poecilia formosa</i>            | Poeciliidae      | Cyprinodontiformes | Series Ovalentaria            | PoeFor_5.1.2 (ENSEMBL 87)                                                                                                                                                         |
| <i>Xiphophorus maculatus</i>       | Poeciliidae      | Cyprinodontiformes | Series Ovalentaria            | Xipmac4.4.2 (ENSEMBL 87)                                                                                                                                                          |
| <i>Gasterosteus aculeatus</i>      | Gasterosteidae   | Perciformes        | Series Eupercaria             | BROADS1 (ENSEMBL 87)                                                                                                                                                              |
| <i>Tetraodon nigroviridis</i>      | Tetraodontidae   | Tetraodontiformes  | Series Eupercaria             | TETRAODON8 (ENSEMBL 87)                                                                                                                                                           |
| <i>Anguilla anguilla</i>           | Anguillidae      | Anguilliformes     | Cohort Elopomorpha            | GCA_000695075.1                                                                                                                                                                   |
| <i>Anguilla japonica</i>           | Anguillidae      | Anguilliformes     | Cohort Elopomorpha            | GCA_000470695.1                                                                                                                                                                   |
| <i>Thunnus orientalis</i>          | Scombridae       | Scombriformes      | Series Pelagiaria             | GCA_000418415.1                                                                                                                                                                   |
| <i>Periophthalmodon schlosseri</i> | Oxudercidae      | Gobiiformes        | Series Gobiaria               | GCA_000787095.1                                                                                                                                                                   |
| <i>Esox lucius</i>                 | Esocidae         | Esociformes        | Subcohort Protacanthopterygii | GCA_000721915.3                                                                                                                                                                   |
| <i>Cynoglossus semilaevis</i>      | Cynoglossidae    | Pleuronectiformes  | Series Carangaria             | GCA_000523025.1                                                                                                                                                                   |
| <i>Amphilophus citrinellus</i>     | Cichlidae        | Cichliformes       | Series Ovalentaria            | GCA_000751415.1                                                                                                                                                                   |
| <i>Scleropages formosus</i>        | Osteoglossidae   | Osteoglossiformes  | Supercohort Osteoglossomorpha | GCA_001624265.1                                                                                                                                                                   |
| <i>Oreochromis niloticus</i>       | Cichlidae        | Cichliformes       | Series Ovalentaria            | GCA_001858045.2                                                                                                                                                                   |
| <i>Salmo salar</i>                 | Salmonidae       | Salmoniformes      | Subcohort Protacanthopterygii | GCA_000233375.4                                                                                                                                                                   |
| <i>Hippocampus comes</i>           | Syngnathidae     | Syngnathiformes    | Series Syngnatharia           | GCA_001891065.1                                                                                                                                                                   |
| <i>Gadus morhua</i>                | Gadidae          | Gadiformes         | Subseries Gadariae            | GCA_900302565.1                                                                                                                                                                   |
| <i>Scorpaena sp.</i>               | Scorpaenidae     | Perciformes        | Series Eupercaria             | this study                                                                                                                                                                        |
| <i>Syngnathus scovelli</i>         | Syngnathidae     | Syngnathiformes    | Series Syngnatharia           | <a href="https://creskolab.uoregon.edu/pip/efish/resources/ssc_2016_12_20_chromlevel.fa.gz">https://creskolab.uoregon.edu/pip/efish/resources/ssc_2016_12_20_chromlevel.fa.gz</a> |
| <i>Fistularia tabacaria</i>        | Fistulariidae    | Syngnathiformes    | Series Syngnatharia           | this study                                                                                                                                                                        |
| <i>Macroramphorus scolopax</i>     | Centriscidae     | Syngnathiformes    | Series Syngnatharia           | this study                                                                                                                                                                        |
| <i>Mullus surmuletus</i>           | Mullidae         | Syngnathiformes    | Series Syngnatharia           | this study                                                                                                                                                                        |
| <i>Nerophis ophidion</i>           | Syngnathidae     | Syngnathiformes    | Series Syngnatharia           | this study                                                                                                                                                                        |
| <i>Dactylopterus volitans</i>      | Dactylopteridae  | Syngnathiformes    | Series Syngnatharia           | this study                                                                                                                                                                        |
| <i>Doryramphus dactylophorus</i>   | Syngnathidae     | Syngnathiformes    | Series Syngnatharia           | this study                                                                                                                                                                        |
| <i>Hippocampus kuda</i>            | Syngnathidae     | Syngnathiformes    | Series Syngnatharia           | this study                                                                                                                                                                        |
| <i>Hippocampus whitei</i>          | Syngnathidae     | Syngnathiformes    | Series Syngnatharia           | this study                                                                                                                                                                        |
| <i>Aeoliscus strigatus</i>         | Centriscidae     | Syngnathiformes    | Series Syngnatharia           | this study                                                                                                                                                                        |
| <i>Syngnathus rostellatus</i>      | Syngnathidae     | Syngnathiformes    | Series Syngnatharia           | this study                                                                                                                                                                        |



|                                  |                 |                    |                              |            |
|----------------------------------|-----------------|--------------------|------------------------------|------------|
| <i>Syngnathus typhle</i>         | Syngnathidae    | Syngnathiformes    | Series Syngnatharia          | this study |
| <i>Entelurus aequoreus</i>       | Syngnathidae    | Syngnathiformes    | Series Syngnatharia          | this study |
| <i>Synodus synodus</i>           | Synodontidae    | Aulopiformes       | Section Cyclosquamata        | ref(24)    |
| <i>Opsanus beta</i>              | Batrachoididae  | Batrachoidiformes  | Series Batrachoidaria        | ref(24)    |
| <i>Diretmoides pauciradiatus</i> | Diretmidae      | Trachichthyiformes | Subdivision Berycimorphaceae | ref(24)    |
| <i>Gephyroberyx darwini</i>      | Trachichthyidae | Trachichthyiformes | Subdivision Berycimorphaceae | ref(24)    |
| <i>Epinephelus aeneus</i>        | Serranidae      | Perciformes        | Series Eupercaria            | (24)       |
| <i>Clupea harengus</i>           | Clupeidae       | Clupeiformes       | Cohort Otomorpha             | (24)       |
| <i>Electrophorus electricus</i>  | Gymnotidae      | Gymnotiformes      | Cohort Otomorpha             | ref(24)    |
| <i>Monopterus albus</i>          | Synbranchidae   | Synbranchiformes   | Series Anabantaria           | ref(24)    |
| <i>Caranx melampygus</i>         | Carangidae      | Carangiformes      | Series Carangaria            | ref(24)    |

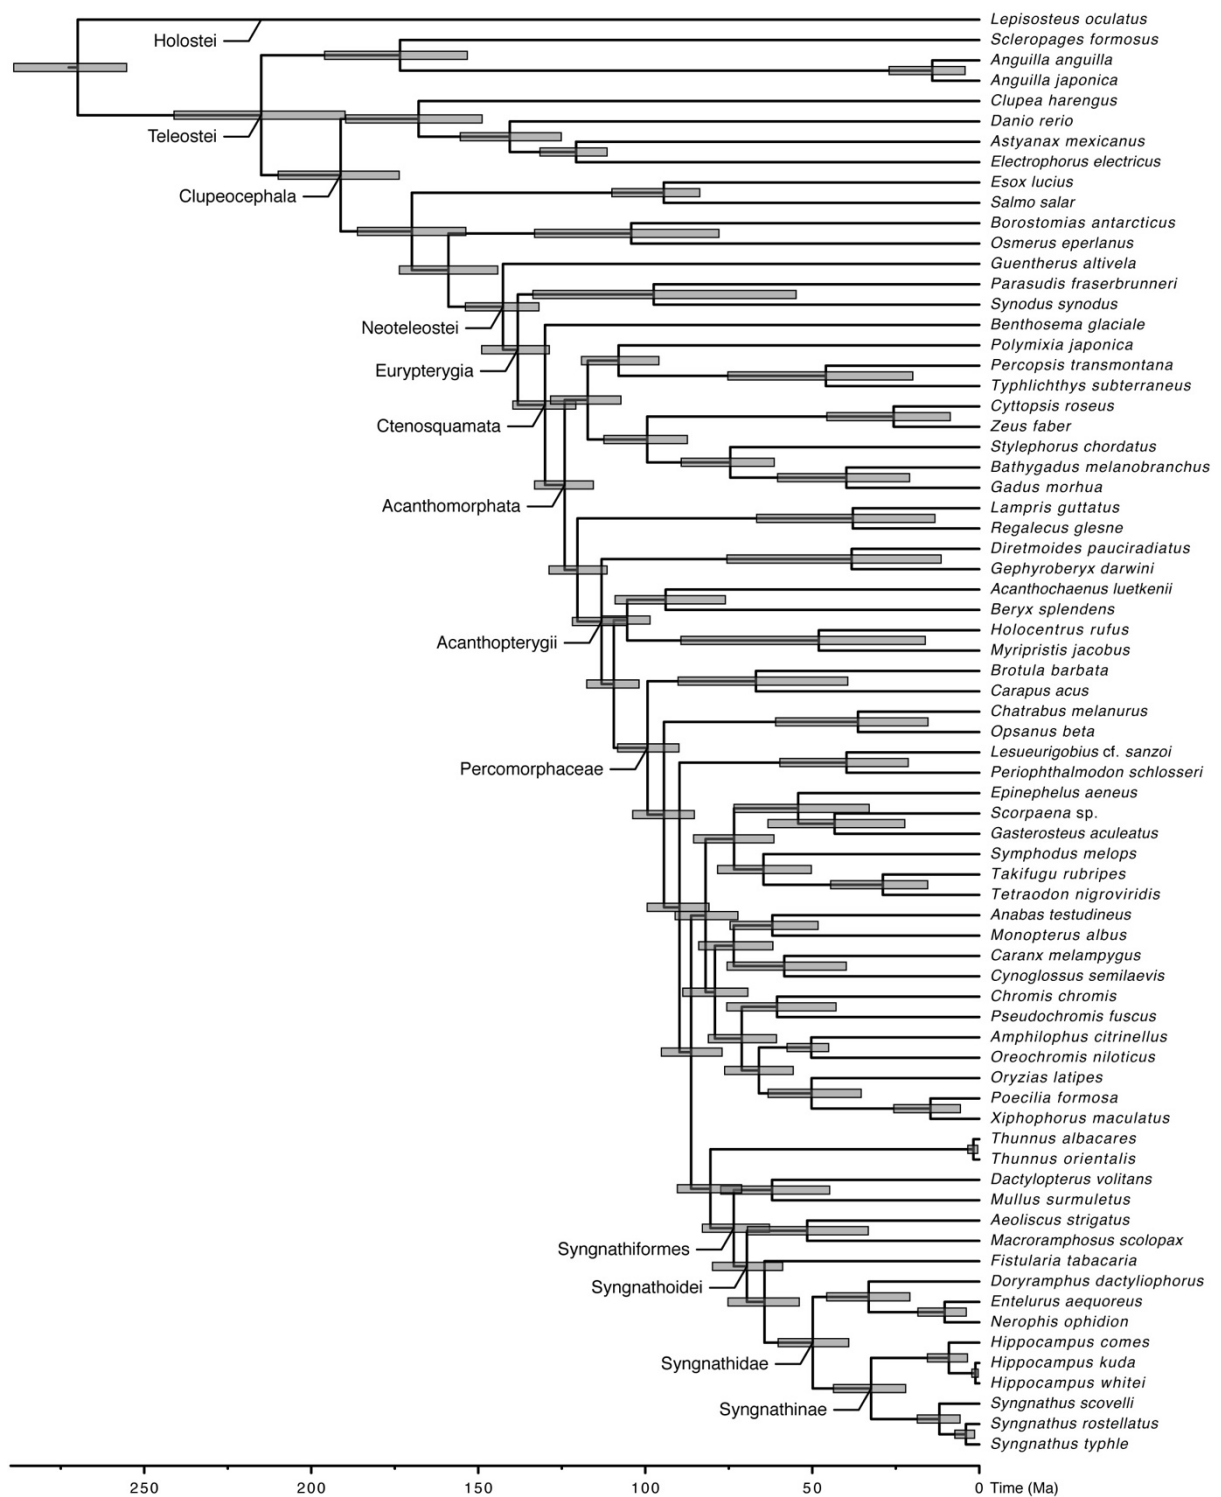

**SI Appendix Figure S1: Time-calibrated phylogeny based on genome assemblies of 70 teleost species and *Lepisosteus oculatus*. The phylogeny shown represents the MCC summary tree of a BEAST analysis calibrated with 34 fossil constraints. Taxonomic classification follows Betancur-R. et al. (2017). All nodes received full Bayesian support (BPP 1.0) except the monophyly of Eurypterygia, which was supported by BPP 0.85. Node bars indicate 95% HPD intervals.**

## 4. Genome size evolution

### 4.1. Optimal genome size evolution

By searching for shifts in the optima of genome size in the different lineages, we aimed to identify a genome size pattern in the evolution of the Syngnathiformes species. We applied the Ornstein–Uhlenbeck process as implemented in the R package(36) using the Syngnathiformes phylogeny and the genome sizes of the species.

While genome sizes of most Syngnathiformes are in the range of 340 to 765 Mbp, both *Nerophis ophidion* and *Entelurus aequoreus* have significantly larger estimated genome sizes (*E. aequoreus*: 1830 Mbp, *N. ophidion*: 1581 Mbp) than all other Syngnathiformes (including their closest relative, *Doryramphus dactylophorus* (650 Mbp)) (SI Appendix Figure S2). As indicated by the BUSCO scores, the expansion of genome size in *N. ophidion* and *E. aequoreus* does not indicate a recent genome tetraploidisation, as the number of duplicated genes is not higher than in all other Syngnathiformes (i.e. between 18 and 127).

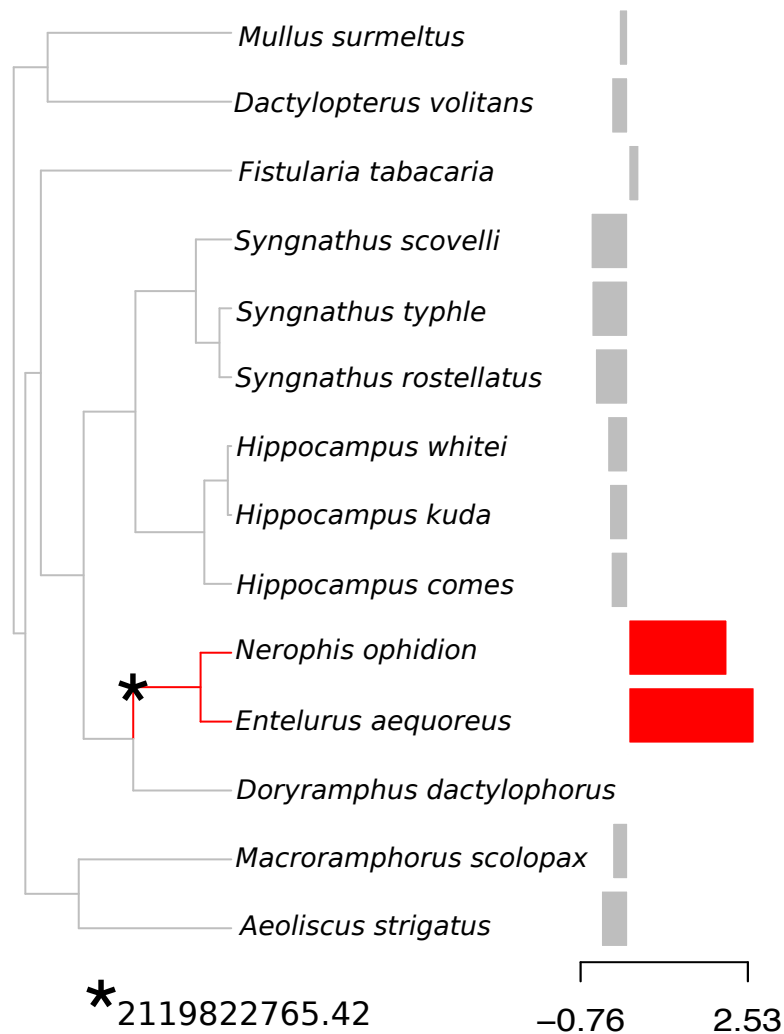

**SI Appendix Figure S2: Ancestor reconstruction of genome size. A shift in genome size has happened in the evolution of Syngnathiformes, i.e. *Nerophis ophidion* and *Entelurus aequoreus* have larger genomes than all other Syngnathiformes (as indicated by red bars).**

#### 4.2. Transposable elements

Transposable elements are known to be the major contributor to genome size evolution(37, 38). To investigate potential reasons for differences in genome size, a library of repeated elements was created as described in ref(39). In brief, RepeatModeler v1.0.8, LTRharvest (part of genomertools v1.5.7)(ref(40)) and TransposonPSI were used in combination to create a set of putative repeats. Elements with only a match against a UniProtKB/SwissProt database and not against the database of known repeated elements included in RepeatMasker were removed. The remaining elements were classified and combined with known repeat elements from RepBase v20150807 (ref(41)).

The fraction of transposable elements correlated well with the genome size of the species investigated here (SI Appendix Table S4). This indicate that during 50 million years,

transposable elements seem to have expanded in *Nerophis ophidion* and *Entelurus aequoreus* (which had potentially already started before the split of *Nerophis* and *Entelurus* from *Doryrhamphus* (SI Appendix Figure S1). Further, a possible contraction of transposable elements evolved in the *Hippocampus* and *Syngnathus* species. This quite rapid change suggests that this clade would be a good model for studies in genome size evolution.

**SI Appendix Table S4: Overview of genome sizes and the repetitive elements of the Syngnathiformes species.**

| <b>Species</b>                   | <b>Assembly size (Mbp)</b> | <b>Estimated genome size (Mbp)</b> | <b>SINEs</b> | <b>LINEs</b> | <b>LTR elements</b> | <b>DNA elements</b> | <b>Unclassified</b> | <b>Total interspersed</b> | <b>Simple repeats</b> |
|----------------------------------|----------------------------|------------------------------------|--------------|--------------|---------------------|---------------------|---------------------|---------------------------|-----------------------|
| <i>Aeoliscus strigatus</i>       | 381                        | 403                                | 0.24         | 1.95         | 0.82                | 3.60                | 5.97                | 12.58                     | 3.25                  |
| <i>Macroramphorus scolopax</i>   | 418                        | 507                                | 0.24         | 1.00         | 0.53                | 2.59                | 4.47                | 8.83                      | 2.67                  |
| <i>Mullus surmuletus</i>         | 469                        | 569                                | 0.07         | 0.91         | 0.67                | 5.08                | 6.56                | 13.29                     | 3.64                  |
| <i>Dactylopterus volitans</i>    | 577                        | 499                                | 0.29         | 3.06         | 1.23                | 6.73                | 8.94                | 20.25                     | 3.75                  |
| <i>Fistularia tabacaria</i>      | 593                        | 762                                | 1.70         | 7.58         | 1.43                | 4.23                | 3.98                | 18.92                     | 4.34                  |
| <i>Doryramphus dactylophorus</i> | 618                        | 651                                | 0.04         | 5.10         | 1.45                | 16.06               | 25.56               | 48.21                     | 1.73                  |
| <i>Syngnathus scovelli</i>       | 307                        | 307                                | 0.31         | 2.17         | 0.95                | 4.20                | 5.34                | 12.97                     | 1.73                  |
| <i>Syngnathus rostellatus</i>    | 283                        | 347                                | 0.27         | 2.12         | 0.78                | 4.97                | 6.46                | 14.60                     | 1.89                  |
| <i>Syngnathus typhle</i>         | 315                        | 315                                | 0.18         | 2.60         | 1.14                | 4.66                | 5.47                | 14.05                     | 1.64                  |
| <i>Hippocampus comes</i>         | 494                        | 494                                | 0.04         | 2.27         | 0.69                | 9.06                | 12.03               | 24.09                     | 2.29                  |
| <i>Hippocampus kuda</i>          | 445                        | 478                                | 0.05         | 2.77         | 0.74                | 9.63                | 12.02               | 25.21                     | 2.55                  |
| <i>Hippocampus whitei</i>        | 433                        | 461                                | 0.26         | 2.64         | 0.65                | 9.65                | 12.69               | 25.89                     | 2.59                  |
| <i>Nerophis ophidion</i>         | 976                        | 1,581                              | 3.09         | 8.81         | 1.66                | 21.27               | 30.85               | 65.68                     | 2.78                  |
| <i>Entelurus aequoreus</i>       | 557                        | 1,834                              | 1.62         | 6.62         | 1.63                | 16.69               | 30.63               | 57.19                     | 2.82                  |

## 5. Gene mining and annotation

To investigate how male pregnancy has coevolved with the immune system, we had chosen to analyse a subset of immune, pregnancy and hemoglobin candidate genes in more details (SI Appendix Table S5). For those, query protein sequences were obtained from Ensembl (release 90) or UniProt (2017) by name search with representatives from *Homo sapiens*, *Mus musculus* and at least three different fish species.

**SI Appendix Table S5: Immune, pregnancy and hemoglobin genes that were aligned among all sequenced Syngnathiformes species and subjected to an analysis of positive selection upon a gene-wise phylogeny.**

| Full gene name                                                          | Abbreviation                                       |
|-------------------------------------------------------------------------|----------------------------------------------------|
| Major histocompatibility complex class I and II                         | <i>MHC I</i> and <i>MHC II</i>                     |
| Activation-induced cytidine deaminase                                   | <i>AICDA</i> alias <i>AID</i>                      |
| Recombination activating 1 and 2                                        | <i>RAG1</i> and <i>RAG2</i>                        |
| Autoimmune regulator                                                    | <i>AIRE</i>                                        |
| Transporter 1 and 2 ATP binding cassette subfamily B member             | <i>TAP1</i> and <i>TAP2</i>                        |
| T-cell surface glycoprotein Cluster of differentiation 4                | <i>CD4</i>                                         |
| T-cell surface glycoprotein Cluster of differentiation 8 alpha and beta | <i>CD8a</i> and <i>CD8b</i>                        |
| Invariant chain                                                         | <i>CD74</i> alias <i>Ii</i> and MHC II gamma chain |
| Class II Major histocompatibility complex transactivator                | <i>CIITA</i>                                       |
| Beta-2-microglobulin                                                    | <i>B2M</i>                                         |
| Immunoglobulin heavy and light chains                                   | <i>IgH</i> and <i>IgL</i>                          |
| Apolipoprotein A1                                                       | <i>APOA1</i>                                       |
| Activating Transcription Factor 3                                       | <i>ATF3</i>                                        |
| Carbonic Anhydrase 4                                                    | <i>Ca4</i>                                         |
| CCAAT Enhancer Binding Protein Beta                                     | <i>CEBPB</i>                                       |
| Distal-Less Homeobox 3                                                  | <i>DLX3b</i>                                       |
| Endothelial PAS Domain Protein 1                                        | <i>EPAS1</i>                                       |
| Fatty Acid Binding Protein 1                                            | <i>FABP1</i>                                       |
| Fatty Acid Binding Protein 3                                            | <i>FABP3</i>                                       |
| Fatty Acid Binding Protein 6                                            | <i>FABP6</i>                                       |
| Hydroxysteroid 11-Beta Dehydrogenase 2                                  | <i>HSD11B2</i>                                     |
| JunB Proto-Oncogene, AP-1 Transcription Factor Subunit                  | <i>JUNB</i>                                        |
| Protein Kinase C Delta                                                  | <i>PRKCD</i>                                       |
| Prostaglandin F2 Receptor Inhibitor                                     | <i>PTGFRN</i>                                      |
| Rh Associated Glycoprotein                                              | <i>RHAG</i>                                        |
| Transferrin                                                             | <i>TF</i>                                          |
| Hemoglobin                                                              | alpha and beta                                     |

### 5.1. Ortholog search within the Syngnathiformes

For immune, pregnancy and hemoglobin genes, translated query sequences were aligned in MEGA7(42) using the MUSCLE alignment algorithm to ensure query protein sequence homology. The protein queries, as whole sequences and for MHC and hemoglobin also split into individual exons, were used as input in a TBLASTN search (blast+-2.2.29) towards the scaffolds from the assembled draft genomes as well as the genomes from

*Syngnathus scovelli* and *Hippocampus comes*. Initially, the TBLASTN search was run with default parameters meaning an E-value cutoff of 10 and reporting results both with alignments and in tabular format. In some cases, searches towards the scaffolds did not lead to any likely homologous sequence promoting a new TBLASTN search, with the same search parameters as described above, towards the unitigs of the assemblies generated in this project. Unitigs were used for *MHC I* and *MHC II* searches due to large copy numbers and the risk of collapsed sequences with the exception of *Hippocampus comes* and *Syngnathus scovelli* where unitigs were not available.

## 5.2. Gene alignments

The hit regions with the lowest E-value and best scores were extracted from the assembled draft genomes using bedtools(43). For multicopy genes such as *MHC I* and *MHC II* all putative hits were extracted and subjected to a reciprocal BLASTX search towards the UniProt database reporting the top hit only to select the proper genomic regions for downstream analyses. When extracting genomic regions for downstream analyzes, an additional 2000 to 10000 bp were extracted both up- and downstream of the target region to capture possible smaller leading and trailing exons. Frequently, these were low-complexity stretches coding for hydrophobic tracts, not detected by the TBLASTN search. The resulting nucleotide fasta sequences were imported into MEGA7 together with the codon sequence from the queries. The nucleotide sequences were translated to protein and then aligned using MUSCLE(44). Gaps were manually inserted to adjust the reading frame whenever needed. The hits from the TBLASTN search using individual exons were used as alignment support. All alignments were manually curated before being cleaned and subjected to different selection analyses.

In the analysis of *MHC II* genes we payed particular attention on the beta sequences since these amino acid sequences were nearly complete in more Syngnathiforme species in contrast to those of the alpha gene. For phylogenetic and structural comparison, full-length sequences of other fish species were retrieved from Genbank. For the phylogenetic analysis, alignments of protein translations were done with MUSCLE(44) and subsequently manually edited. To maximize completeness of the alignments across taxa, they had to be split into one covering more the first portion (thus exons 1-3; SI Appendix Data Set 1: 30MHCII\_beta\_1-86aa) and another one covering more the second portion of the gene (thus exon 3-5, SI Appendix Data Set 1: 31MHCII\_beta\_91-184aa). We also examined whether or not critical di-sulfide (cystein) bridges within exon 2 and 3 were present, which are required for the appropriate tertiary structure of the *MHC II*



molecules(45, 46). For secondary and tertiary structure prediction we used the neural network algorithm developed by Rost & Sander(47). We applied DISULFIND(48) to identify structurally important di-sulfide bridges among cysteine residues; both were implemented in the online package predictprotein (available at <https://www.predictprotein.org/>). As "positive" controls we used several full *MHC II beta* sequences of well-curated species obtained from Genbank (stickleback AY713945, seabass DQ821110.1, pikeperch AA019848.1).

### 5.3. Gene trees

Trees were generated with RAxML (v. 8.2.10)(49) using the JT T model for MHC I and the VT model for MHC II as determined by the RAxML "PROTGAMMAAUTO" method. 100 rapid bootstraps were run. For *hemoglobin* phylogenetic gene trees for alpha and beta sequences, respectively, were constructed using maximum likelihood in MEGA7(42) using the GTR+G+I model for alpha-sequences and TN93+G model for beta-sequences (these models had the lowest AIC score), with 1000 bootstrap runs (alignments of  $\alpha$  and beta sequences are in SI Appendix Data Set 1). Sequences were translated into amino acids and aligned using ClustalW(50) as implemented in MEGA7(42) with default settings for all species (alignments of alpha and beta sequences are in SI Appendix Data Set 1: 1hemoglobin\_alpha & 2hemoglobin\_beta). The alpha and beta orthologous genes were then mapped on a phylogenomic species tree.

### 5.4. Local gene synteny

For the additionally lost genes related to the MHC II pathway in *Syngnathus* (*AID* (*AICDA*), *CD4*, *CIITA*) local gene synteny was explored. Syntenic genes were found using the Ensembl genome browser and corresponding peptide sequences of flanking genes directly up- and down-stream of the gene in question were downloaded from several fish species. These peptide queries were used in a TBLASTN as described in the main text (blast+ v 2.6.0, e-value cutoff 1-e10 and tabular output). The output was sorted for genomic contig/scaffold/linkage group and then for start position within each of these. The corresponding hit region for the syntenic genes were subjected to a reciprocal BLASTX using first bedtools for sequence extraction and then the NCBI BLASTX server with default parameters.

In the case of *MHC II*, local gene synteny was drawn as follows: *MHC II* protein sequences (as used in the overall immune gene characterization) were used in a TBLASTN search against the Ensembl genome assemblies of zebrafish, fugu and stickleback using the Ensembl web TBLASTN function with default parameters. BLAST hit regions were

recursively subjected to a BLASTX search using the NCBI blast server with default parameters. If the recursive hits were *MHC II* sequences, we extracted peptide sequences from predicted gene models located up- and downstream from the Ensembl query. These peptide sequences were subjected to a BLASTP, again using the NCBI web BLAST tool, to either verify or obtain annotation. In the cases of no recursive hit, or where the hit was an unknown protein, the query peptide sequence was given “ORF” as annotation. All peptide sequences obtained from Ensembl, together with previously extracted *MHC II* sequences from *Hippocampus comes* as well as the *MHC II* peptide sequences used for *MHC II* gene mining, were used in a TBLASTN search against the scaffolds of the Syngnathiformes species as well as the downloaded assemblies from *Hippocampus comes* and *Syngnathus scovelli*. Unitigs were not used as they were generally too short for synteny. The regions surrounding *MHC II* hits in *Hippocampus comes* were extracted and subjected to a BLASTX using the NCBI BLAST tool with default parameters to obtain information about surrounding genes. The same was also done for our two *Hippocampus* draft genomes, *Hippocampus kuda* and *Hippocampus whitei*. In some cases, these regions contained different genes than the syntenic genes already downloaded from Ensembl and representative peptide sequences of these were obtained from GenBank and added to the original query list. With these included, the TBLASTN search was rerun (as described above). Synteny was drawn for zebrafish, stickleback and fugu as well as the *Hippocampus comes*, *Hippocampus kuda* and *Hippocampus whitei* based on the tabular BLAST output files. For the *Syngnathus* species we sorted the output, highlighting the best hit for each query and sorted those by genomic region to get preliminary overview of potential syntenic regions compared to zebrafish, stickleback, fugu and the *Hippocampus* species. Having pinpointed potential genomic regions, the entire tabular BLAST output from the *Syngnathus* species was sorted on genomic region and then on query starting point. The gene order of the putative *MHC II* loss regions was drawn into the local synteny accordingly.

## 5.5. Results of for candidate gene mining and annotation

### 5.5.1. Activation-induced cytidine deaminase (*AID/AICDA*) - loss of *AICDA* in *Syngnathus*

With its responsibility for the unique receptor diversity of the antibodies, *AICDA* is a key gene of the *MHC II* pathway. A well conserved copy of *AID* (*AICDA*) was found in all investigated species except in the three *Syngnathus* species. For *Doryrhamphus dactyliophorus* the gene was divided between two scaffolds. An *AICDA* fragment was found

for *Nerophis ophidion* and *Entelurus aequoreus*. The loss of *AID* (*AICDA*) was further explored by characterizing the local gene synteny between all the investigated species (SI Appendix Figure S3). Genes located directly up- and downstream of *AICDA* in non-*Syngnathus* species were co-localized on the same linkage group or scaffold in the three *Syngnathus* species supporting a loss of *AICDA* in these species (SI Appendix Figure S3, SI Appendix Table S6, SI Appendix Data Set 1: 3AID\_clean & 4AID\_raw).

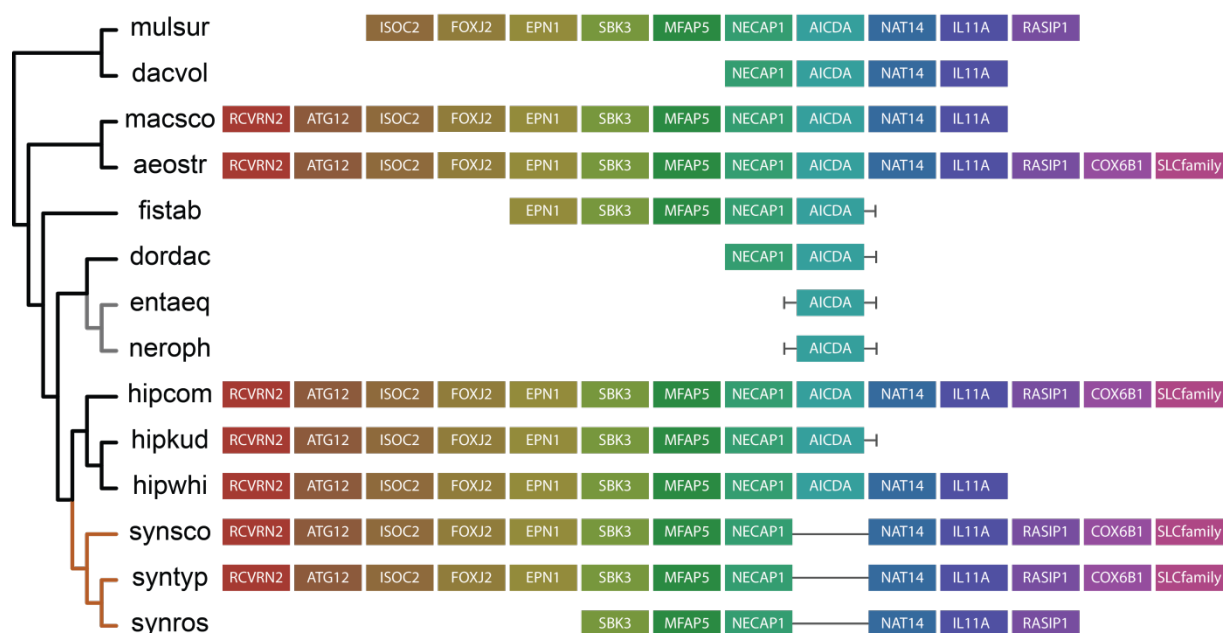

**SI Appendix Figure S3: Local gene synteny of the *AICDA* region in all species contrasted to the putative *AICDA* regions of the *Syngnathus* species.**

**SI Appendix Table S6: Genome assembly localization of *AICDA* (for *Syngnathus*, putative *AICDA* region).**

| Species                          | Genomic location of <i>AICDA</i> syntenic region |
|----------------------------------|--------------------------------------------------|
| <i>Mullus surmuletus</i>         | scf7180003351178                                 |
| <i>Dactylopterus volitans</i>    | scf7180002994818                                 |
| <i>Macroramphorus scolopax</i>   | scf7180002135645                                 |
| <i>Aeoliscus strigatus</i>       | scf7180001813954                                 |
| <i>Fistularia tabacaria</i>      | scf7180005990769                                 |
| <i>Doryramphus dactylophorus</i> | scf7180001777170<br>scf7180001777885             |
| <i>Entelurus aequoreus</i>       | utg7180017948567                                 |
| <i>Nerophis ophidion</i>         | scf7180014164377                                 |
| <i>Hippocampus comes</i>         | KV879925.1                                       |
| <i>Hippocampus kuda</i>          | scf7180002363415                                 |
| <i>Hippocampus whitei</i>        | scf7180002671084                                 |
| <i>Syngnathus scovelli</i>       | LG3                                              |
| <i>Syngnathus typhle</i>         | scaffold00035                                    |
| <i>Syngnathus rostellatus</i>    | scf7180002437117                                 |

### 5.5.2. T-cell surface glycoprotein Cluster of differentiation 4 (*CD4*) - loss of *CD4* in *Syngnathus*

*CD4* mediates successful receptor binding and activation of CD4+ T lymphocytes upon MHC II- mediated antigen presentation. A copy of *CD4* with all previously described exons was found in all investigated Syngnathiformes species with the exception of *Syngnathus* – a loss that we further explored using local gene synteny similarly to *AICDA*. In the *CD4*-containing genomes, the gene was often located on a short assembly scaffold with few or no flanking genes. No synteny was possible for *Mullus surmuletus*, *Nerophis ophidion* and *Entelurus aequoreus*. Sparse synteny was obtained for the *Hippocampus* species. The most common pattern of *CD4* flanking genes was used to screen possible scaffolds and linkage groups in the *Syngnathus* species. A possible syntenic scaffold was found in *Syngnathus scovelli* and *Syngnathus typhle* further supporting the genetic loss of *CD4*. For *Syngnathus rostellatus* we found several possible scaffolds containing syntenic genes, but without enough flanking sequence to support the loss of *CD4* in this particular species. However, based on the lack of a *CD4*-like sequence in the remaining *Syngnathus*, we assume a loss of *CD4* in *Syngnathus rostellatus* as well (SI Appendix Figure S4, SI Appendix Table S7, SI Appendix Data Set 1: 5CD4\_clean\_conserved\_block\_no\_frag & 6CD4\_clean\_conserved\_block)).

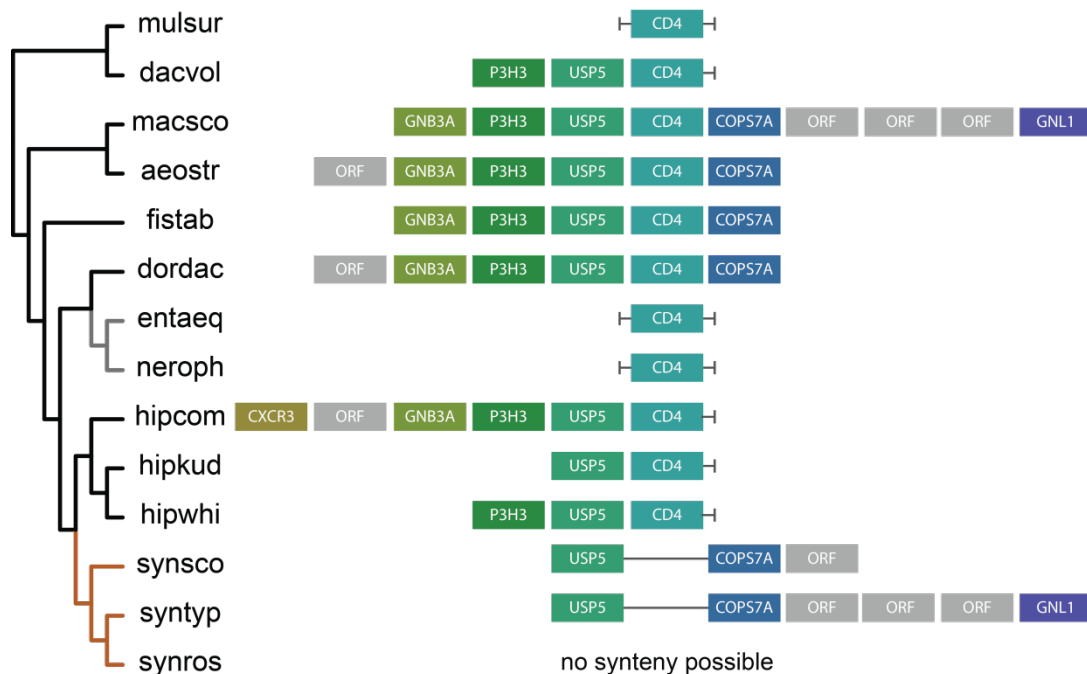

**SI Appendix Figure S4: Local gene synteny of the *CD4* region in all species contrasted to the putative *CD4* regions of *Syngnathus* species. Synteny was not possible for *Syngnathus rostellatus* due to the fragmented nature of the genome in this region.**

**SI Appendix Table S7: Localization of *CD4* (for *Syngnathus*, putative *CD4* region) in the respective genome assembly.**

| Species                          | Genomic location of <i>CD4</i> syntenic region |
|----------------------------------|------------------------------------------------|
| <i>Mullus surmuletus</i>         | scf7180003339999                               |
| <i>Dactylopterus volitans</i>    | scf7180002998269                               |
| <i>Macroramphorus scolopax</i>   | scf7180002137464                               |
| <i>Aeoliscus strigatus</i>       | scf7180001813266                               |
| <i>Fistularia tabacaria</i>      | scf7180005996797                               |
| <i>Doryramphus dactylophorus</i> | scf7180001789914                               |
| <i>Entelurus aequoreus</i>       | scf7180039925332                               |
| <i>Nerophis ophidion</i>         | scf7180014150266                               |
| <i>Hippocampus comes</i>         | KV879925.1                                     |
| <i>Hippocampus kuda</i>          | scf7180002375734                               |
| <i>Hippocampus whitei</i>        | scf7180002656493                               |
| <i>Syngnathus scovelli</i>       | scaffold_803                                   |
| <i>S Syngnathus typhle</i>       | scaffold00169                                  |
| <i>Syngnathus rostellatus</i>    | No synteny possible                            |

5.5.3. Class II Major histocompatibility complex transactivator (*CIITA*) - lost in *Syngnathus* but also possible loss in *Fistularia tabacaria*

*CIITA* controls the expression of MHC II genes in antigen presenting cells (APCs). A copy of *CIITA* with all 19 exons was found in all species with the exception of the *Syngnathus* species, but also surprisingly in *Fistularia tabacaria*. *CIITA*, being a member of the NOD-like receptor family (NLR), displayed significant sequence variation in the first 10 exons in all investigated species (compared to the human exon-intron structure) to such an extent that these exons are difficult or impossible to detect based on sequence similarity alone without the support of RNA data. For this reason, the leading exons are not included in downstream analyses. The remaining part of the gene is well conserved and was easily detected in the no-loss species assemblies. Where *CIITA* was absent, we further explored the loss using local gene synteny. We found good putative *CIITA* containing scaffolds and linkage groups in the *Syngnathus* species and in *Fistularia tabacaria* based on local gene synteny towards the other species, but could not detect any fragments of *CIITA* between the first flanking gene directly up- and downstream. Collectively, this indicates a loss of *CIITA* in all three *Syngnathus* and in *Fistularia tabacaria* (SI Appendix Figure S5, SI Appendix Table S8, SI Appendix Data Set 1: 7CIITA\_raw & 8CIITA\_temp\_section\_with\_ensembl & 9CIITA\_temp\_section).

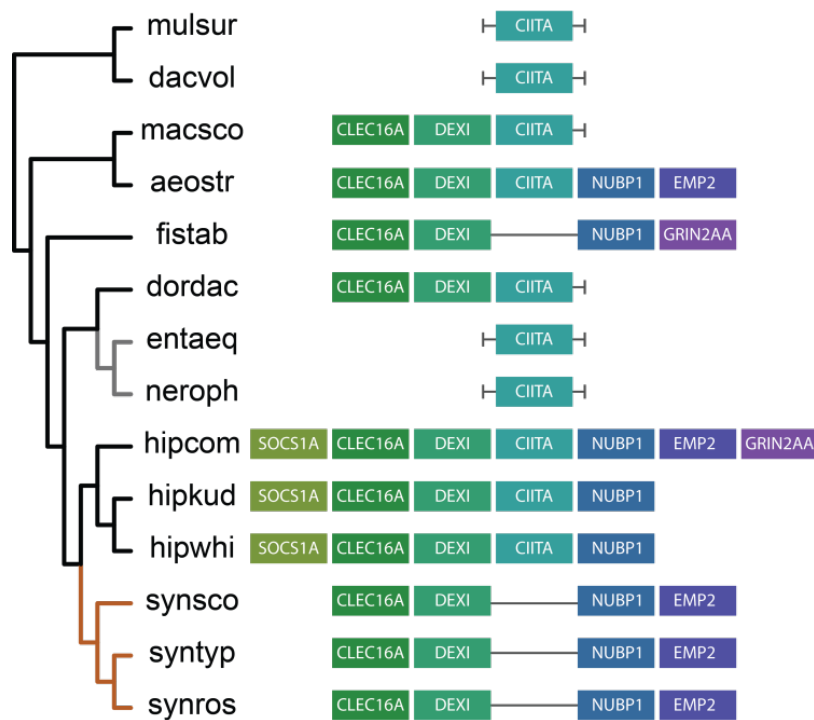

**SI Appendix Figure S5: Local gene synteny of the *CIITA* region in all species contrasted to the putative *CIITA* regions of *Syngnathus* species.**

**SI Appendix Table S8: Genome assembly localization of *CIITA* (for *Syngnathus*, putative *CIITA* region).**

| Species                          | Genomic location of <i>CIITA</i> syntenic region |
|----------------------------------|--------------------------------------------------|
| <i>Mullus surmuletus</i>         | scf7180003352461                                 |
| <i>Dactylopterus volitans</i>    | scf7180003014039                                 |
| <i>Macroramphorus scolopax</i>   | scf7180002139468                                 |
| <i>Aeoliscus strigatus</i>       | scf7180001817874                                 |
| <i>Fistularia tabacaria</i>      | scf7180005993608                                 |
| <i>Doryramphus dactylophorus</i> | scf7180001773600                                 |
| <i>Entelurus aequoreus</i>       | scf7180039813037                                 |
| <i>Nerophis ophidion</i>         | scf7180014049719                                 |
| <i>Hippocampus comes</i>         | KV879887.1                                       |
| <i>Hippocampus kuda</i>          | scf7180002375048                                 |
| <i>Hippocampus whitei</i>        | scf7180002661233                                 |
| <i>Syngnathus scovelli</i>       | LG16                                             |
| <i>Syngnathus rostellatus</i>    | scf7180002437310                                 |
| <i>Syngnathus typhle</i>         | scaffold00004                                    |

#### 5.5.4. MHC II invariant chain (*CD74*) – sequence variation and exon loss in *Hippocampus* and *Syngnathus*

*CD74* prevents premature peptide binding of *MHC II*. A copy of *CD74* was found in all investigated species (SI Appendix Data Set 1) (a fragment from *Doryrhamphus dactyliophorus* was, however, not included in the positive selection alignment). However, the *CD74* sequence for *Hippocampus* and *Syngnathus* species diverged from the remaining

species, as well as from the reference sequences of well characterized species obtained from Ensembl. Based on the human exon-intron structure, the coding sequence of exon 1 was very different to the reference species. An existing start codon, however, suggests that *CD74* could be functional in *Hippocampus* and *Syngnathus*, its length and sequence were further conserved between *Hippocampus* and *Syngnathus*. Directly downstream a well conserved exon 2 is followed by a diverged exon 3 (CLIP) in *Hippocampus* and *Syngnathus*. There are some conserved amino acids supporting the placement of exon 3. Exon 4 is very short, but well enough conserved followed by the somewhat longer, and again well conserved exon 5. Exon 6 is well conserved across all teleost species. The exon 6b is in *Syngnathus* divergent from other teleost species and replaced in *Hippocampus*. The final exon 7 is again not only divergent from Ensembl species but the sequence is also different between *Syngnathus* and *Hippocampus* (Figure 3, SI Appendix Figure S6; SI Appendix Data Set 1: 10CD74\_clean & 11CD74\_exon\_loss\_determination\_clean).

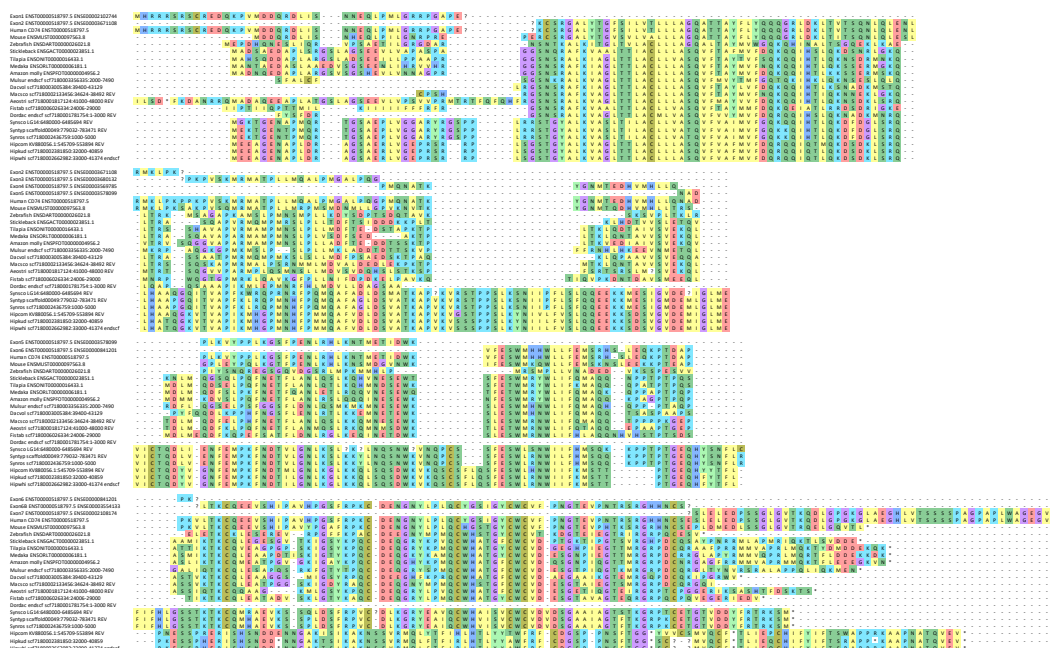

**SI Appendix Figure S6: Alignment of *CD74* in all species contrasted with sequences from Ensembl: human, mouse, zebrafish, stickleback, medaka, tilapia and Amazon molly. The exon sequences from the human *CD74* gene is included. CLIP is located in the human exon 3. Exon 7 is not found in the *Hippocampus* species. Exon 8 is highly variable.**

5.5.5. Autoimmune regulator (*51*) - found in all species. Increased sequence diversity in *Syngnathus* and *Hippocampus*.

*AIRE* drives negative selection on self-recognizing T lymphocytes. A copy of *AIRE* was found in all investigated species with fragments in *Nerophis ophidion* and *Entelurus aequoreus*. In *Hippocampus comes*, the sequence contained a misassembly and thus only a fragment is included in the alignment (SI Appendix Data Set 1: 16AIRE\_redone\_clean\_with\_HipComfrag). All investigated species displayed well conserved *AIRE* regions determining gene presence. Compared to the human exon-intron structure, exons 7 and 10 were not alignable to the fish sequences. Furthermore, exon 8 appears ultra-conserved across all species. *Hippocampus* and *Syngnathus* species sequences displayed some additional sequence diversity compared to the other teleost species, in particular in exons 3-6 and 12. Thus, the final alignment only contains regions of *AIRE* with confident alignment towards other teleost species (SI Appendix Data Set 1: 18AIRE\_redone\_with\_ensembl).

5.5.6. Beta-2-microglobulin (*B2M*)– present in all species, copy number variation

*B2M* was found in all investigated species with either 2 or 3 copies and appears well conserved. The copies cluster into two well-defined clades and within each clade cluster according to the species phylogeny (SI Appendix Figure S7, SI Appendix Data Set 1: 20B2M\_clean\_trimmed\_nucl & 21B2M\_clean & 22B2M\_raw).



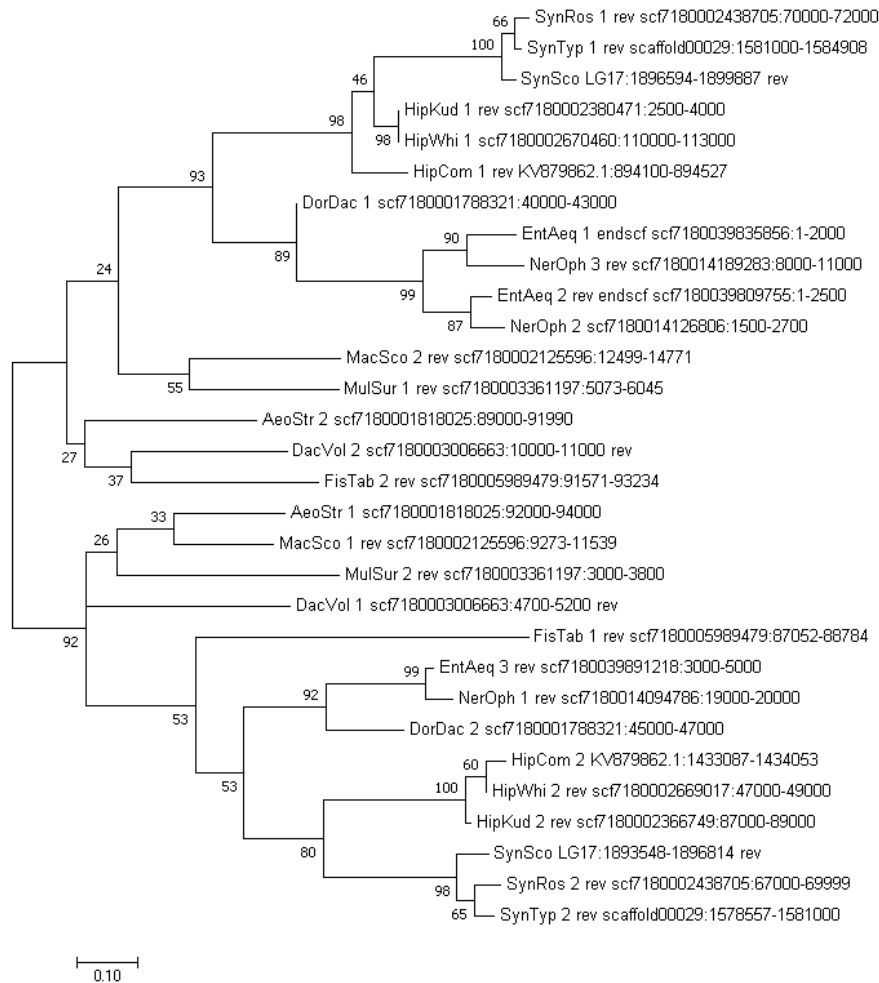

**SI Appendix Figure S7: Maximum likelihood tree of the *B2M* gene. The phylogeny is based on the JTT model, 500 bootstraps, derived from a protein alignment of all detected *B2M* sequences.**

#### 5.5.7. *CD8A/B* – *Syngnathus* and *Hippocampus* only have *CD8A*

We found *CD8A* and *CD8B* in all species except in in *Hippocampus* and *Syngnathus* where only *CD8A* was found. For *Fistularia tabacaria*, both *CD8A* and *CD8B* was found in the unitigs and not in the scaffolds. Similarly, for *Dactylopterus volitans*, *CD8A* was found in the unitigs. All obtained *CD8* sequences cluster into two well-defined clades in the phylogenetic tree, either *CD8A* or *CD8B* (SI Appendix Figure S8, SI Appendix Data Set 1: 23CD8\_clean\_with\_ensembl & 24CD8\_clean & 25CD8\_clean\_compactsection).

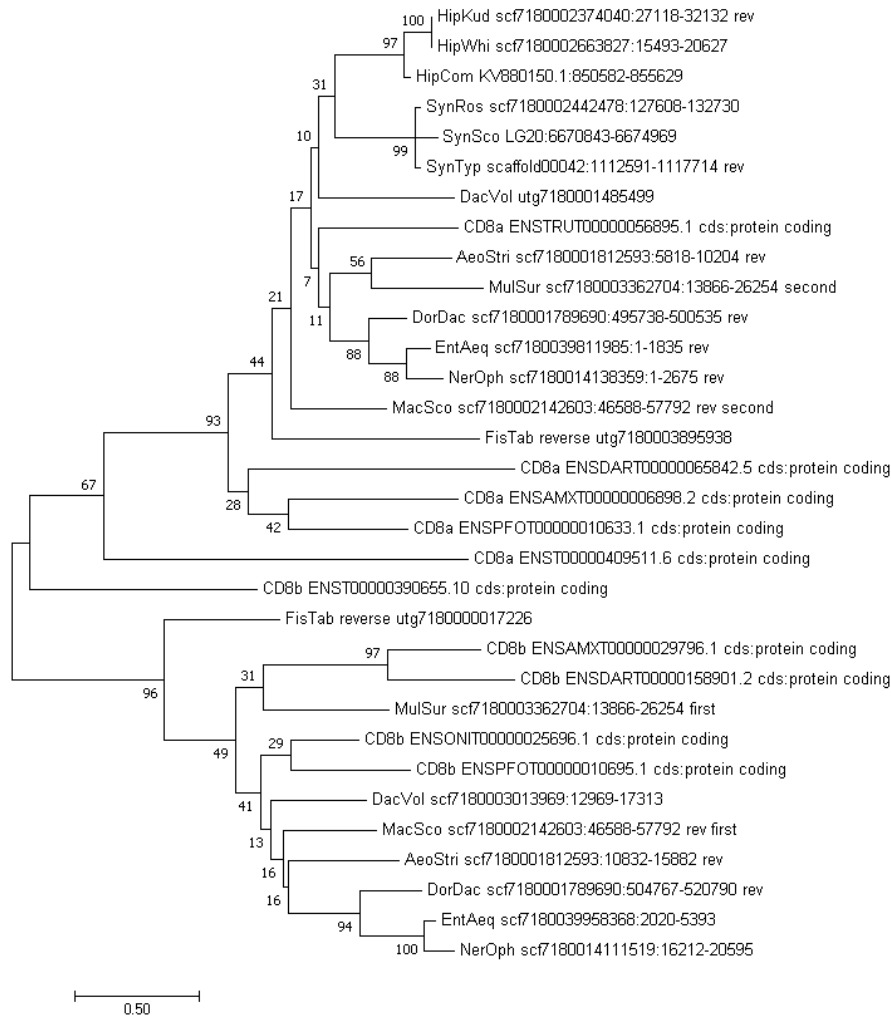

**SI Appendix Figure S8: Maximum likelihood tree of the *CD8A/B* gene, JTT model, 500 bootstrap of the *CD8A/B* protein alignment including reference sequences from Ensembl: human (ENST), zebrafish (ENSDAR), cave fish (ENSAMX), tilapia (ENSONI) and Amazon molly (ENSPFO).**

#### 5.5.8. Major Histocompatibility Complex I (*MHC I*)

The expansion of *MHC I* diversity in cod was suggested as a functional compensation for the loss of *MHC II* (52). We aimed to identify whether in Syngnathiformes *MHC I* coevolved with male pregnancy and the loss of a functional *MHC II* pathway. Number of detected *MHC I* exon fragments were highly variable within and among species, in line with previous PCR based reports in many fish species. *A. strigatus* and *F. tabacaria* had very low numbers of both *MHC I* exon 2 and exon 3, in contrast to all syngnathids but also *M. surmuletus* and *M. scolopax*. *M. surmuletus* and *N. ophidion* had particularly high numbers of exon 2 and exon 3 fragments. While in the hypervariable exon 2 and exon 3, no phylogenetic pattern of *MHC I* evolution in Syngnathiformes could be detected, using the most conservative exon 4 of the *MHC I* gene, we found that the copy number of *MHC I* was high in all Syngnathiformes species with male pregnancy (the *Nerophinae* with external

male pregnancy (27-42 copies), *Hippocampus* (20-36 copies) and *Syngnathus* (24–44 copies, *Syngnathus scovelli* excluded) with internal male pregnancy) compared to the species without male pregnancy (5-10 copies) (Figure 2; SI Appendix Table S9). The number of *MHC I* fragments in *Syngnathus scovelli* has to be treated with caution, as from this published genome(3) unitigs, from which the search for the other genomes was done, were not available.

We examined the relatedness of Syngnathiformes *MHC I* sequences to homologous sequences in other, well-curated fish species (SI Appendix Data 1: 26MHCI\_exon2 & 27MHCI\_exon3 & 28MHCI\_exon4). The resulting tree topologies of two phylogenies obtained by either a long portion of the exon 4 (SI Appendix Figure S9) or the second half of the exon 4 (SI Appendix Figure S10), respectively, revealed that the *MHC I* variants group into two very divergent clades, which are partially distinct from all other *MHC I* types distributed among other fish families. While these sequences are part of the *MHC I* U lineage clade in the gene tree(53), the distinct cluster of syngnathid *MHC I* sequences supports a potential coevolution of *MHC I* with male pregnancy (SI Appendix Figure S9-S10). These lineage-specific *MHC I* variants likely increase the ligand repertoire and suggest a possible function within the cross-presentation pathway, similar to Atlantic cod.

**SI Appendix Table S9: Number of detected *MHC I* fragments in the different assemblies. Fragment number does not directly reflect *MHC I* gene number as fragments may overlap. Fragment number is given per exon. Further analyses were done with exon 4. \* previously published genome where unitigs were not available, results have to be treated with caution. \*\* large fragmented genomes.**

| Species                          | Exon 2 | Exon 3 | Exon 4 |
|----------------------------------|--------|--------|--------|
| <i>Mullus surmuletus</i>         | 72     | 81     | 9      |
| <i>Dactylopterus volitans</i>    | 12     | 13     | 11     |
| <i>Macroramphorus scolopax</i>   | 47     | 30     | 5      |
| <i>Aeoliscus strigatus</i>       | 5      | 8      | 5      |
| <i>Fistularia tabacaria</i>      | 6      | 8      | 10     |
| <i>Doryramphus dactylophorus</i> | 33     | 23     | 27     |
| <i>Entelurus aequoreus</i> **    | 88     | 140    | 42     |
| <i>Nerophis ophidion</i> **      | 50     | 36     | 37     |
| <i>Hippocampus comes</i> *       | 32     | 27     | 36     |
| <i>Hippocampus kuda</i>          | 34     | 30     | 20     |
| <i>Hippocampus whitei</i>        | 37     | 29     | 29     |
| <i>Syngnathus scovelli</i> *     | 11     | 11     | 10     |
| <i>Syngnathus typhle</i>         | 28     | 26     | 24     |
| <i>Syngnathus rostellatus</i>    | 53     | 66     | 44     |

#### 5.5.9. Major Histocompatibility Complex II (*MHC II*)

We were unable to identify *MHC II alpha* and *beta* genes in all three *Syngnathus* species in contrast to all other investigated species. In *M. scolopax* we detected an extreme amount

of *beta* fragments compared to the other investigated species. *M. surmuletus* had a similar trend, but not as significant. We also observed that the *MHC II* fragments found in *Hippocampus* looked different compared to the other investigated species. We examined the relatedness of Syngnathiformes *MHC II beta* sequences to homologous sequences in other, well-curated fish species (SI Appendix Data Set 1: 29MHCII\_beta\_complete & 30MHCII\_beta\_1-86aa & 31MHCII\_beta\_91-184aa). The resulting tree topologies of two phylogenies obtained by the first and second portion of the gene, respectively, revealed that the *MHC II beta* variants group into two very divergent clades, which are partially distinct from all other *MHC II beta*-types distributed among other major fish families such as salmonids, flatfishes, carp-like fishes and perches (SI Appendix Figure S11-S12). In particular, the phylogeny based on the more conserved second section of the gene (exon 3, 4) supports the distinct status of those clades from all other Actinopterygii by high bootstrap values (>99%). In contrast, the phylogeny on the first section of the gene under strong positive selection shows two distinct types only, one of which shows several syngnathid species intermingled with other Actinopterygii species. Note that in the more informative second-section phylogeny, aside from genus *Hippocampus*, only *Dactylopterus volitans* as a sister species to the syngnathids possess one gene variant belonging to both distinct sequence groups. Interestingly, only the sequence lineage without two 2 bp deletions within peptide binding exon 2 (SI Appendix Data Set 1: 29MHCII\_beta\_complete & 30MHCII\_beta\_1-86aa & 31MHCII\_beta\_91-184aa) is populated by most of the other sequenced syngnathid taxa including those with external egg carrying (i.e. *Entelurus aequoreus*, *Nerophis ophidion*, *Doryrhamphus dactylophorus*).

#### 5.5.10. MHC class IIB analysis in *Hippocampus*

While the genus *Syngnathus* has no detectable genes or pseudogenized remains of both *MHC II* genes (*alpha* and *beta*) in their genomes, the genus *Hippocampus* as second genus with full pregnancy was reported to possess *MHC II alpha* and *beta* sequences(54), which we can confirm in this study. *Hippocampus*-sequences in one of the 2 distinct sequence clades are characterized by two 2-aa indels within the alpha 2 domain (=exon 2, peptide binding region, SI Appendix Data Set 1: 29MHCII\_beta\_complete & 30MHCII\_beta\_1-86aa & 31MHCII\_beta\_91-184aa) with unknown but presumably critical effects on functionality. In *Hippocampus*, in two sequences where the completeness of the *MHC II beta* sequence permits a test for disulfide bridges (one each for *H. comes* and *H. rano*) we found that critical di-sulfide (cystein) bridges within exon 2 and 3 are absent. These are

required for the appropriate tertiary structure of the *MHC II* molecules to form the peptide-binding groove(45, 46). None of the *Hippocampus comes* *MHC II beta* sequences tested is predicted to form the required disulfide bonds between cystein-residues located in exons 2 and 3, respectively, which stabilize the peptide-binding pocket(45, 46). Since the cystein residues themselves are still present (see aa positions 29 - 94; and 132 - 188), this is probably due to major re-arrangements in the secondary structure of the *MHC II beta* molecule. In contrast, with high likelihood, DISULFIND identified two di-sulfide bridges in the *MHC II beta* molecules of all three "control" species. Along with the finding that both major *MHC II beta* sequence variants in *Hippocampus* spp. were very divergent to other homologous Actinopterygii genes (SI Appendix Figure S11-S12), it is doubtful whether *Hippocampus MHC II* molecules can form and be functional, leaving aside other genes required for the MHC class II pathway.

**SI Appendix Table S10: *MHC II* fragments detected in the genome assemblies of the different Syngnathiformes species. Fragment number does not directly reflect *MHC II* gene number as fragments may overlap. \* deep sequenced genomes. \*\* large fragmented genomes.**

| Species                          | MHC class II Alpha fragments | MHC class II Beta fragments |
|----------------------------------|------------------------------|-----------------------------|
| <i>Mullus surmuletus</i>         | 9                            | 15                          |
| <i>Dactylopterus volitans</i>    | 4                            | 4                           |
| <i>Macroramphorus scolopax</i>   | 4                            | 43                          |
| <i>Aeoliscus strigatus</i>       | 3                            | 4                           |
| <i>Fistularia tabacaria</i>      | 2                            | 3                           |
| <i>Doryramphus dactylophorus</i> | 3                            | 4                           |
| <i>Entelurus aequoreus</i> **    | 1                            | 1                           |
| <i>Nerophis ophidion</i> **      | 1                            | 1                           |
| <i>Hippocampus comes</i> *       | 6                            | 6                           |
| <i>Hippocampus kuda</i>          | 5                            | 9                           |
| <i>Hippocampus whitei</i>        | 5                            | 7                           |
| <i>Syngnathus scovelli</i>       | 0                            | 0                           |
| <i>Syngnathus typhle</i> *       | 0                            | 0                           |
| <i>Syngnathus rostellatus</i>    | 0                            | 0                           |

**SI Appendix Figure S9: Maximum likelihood phylogeny of exon 4 of the *MHC I* gene in the Syngnathiformes and other fish species using sequences spanning the entire exon. Alignment was performed with MUSCLE and subsequent manual editing.**

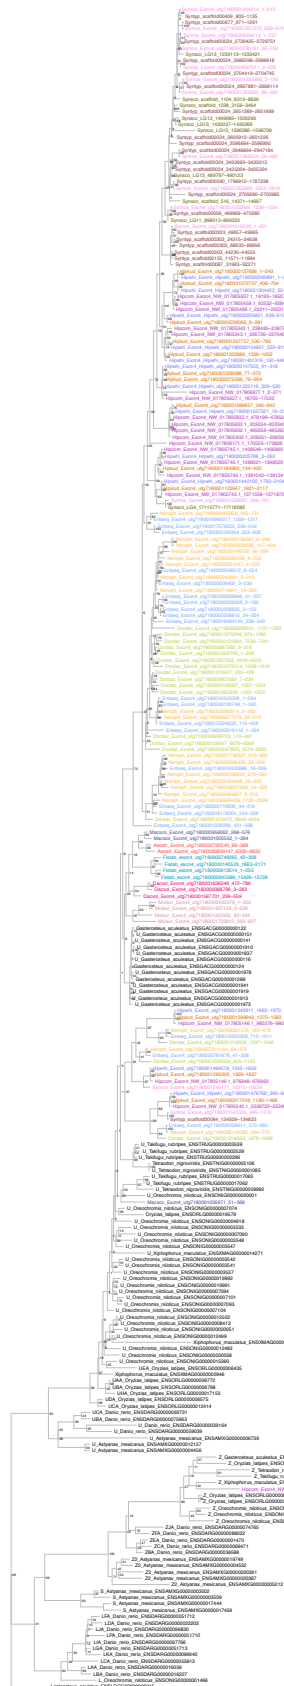

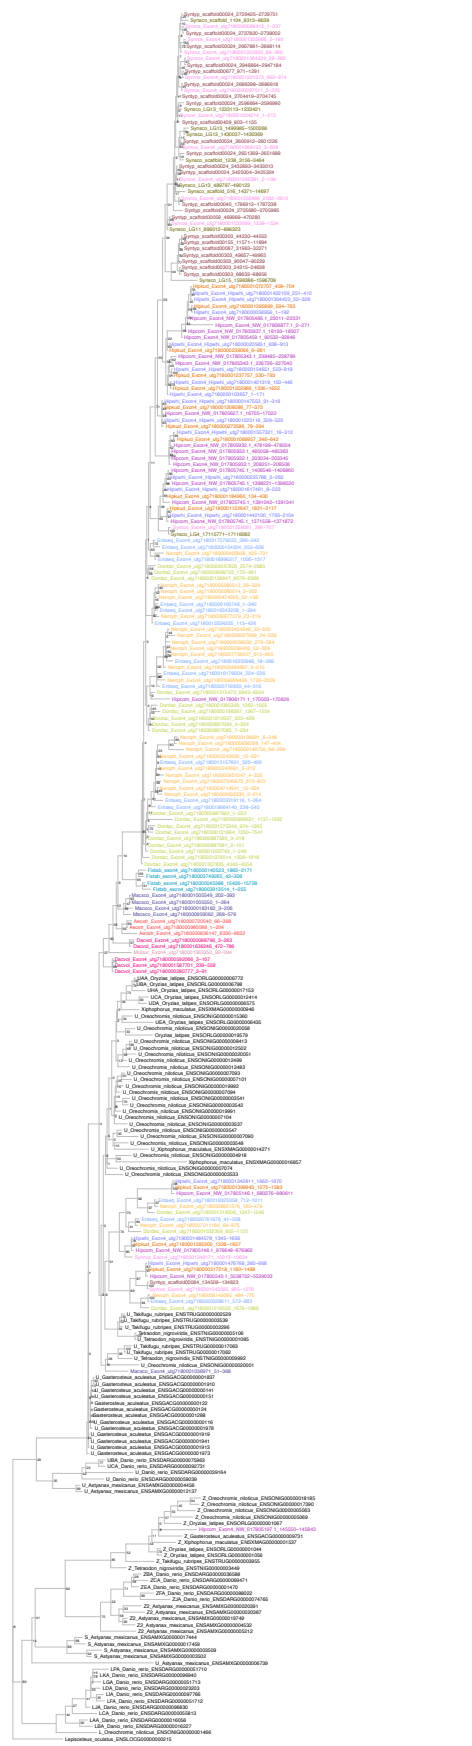

**SI Appendix Figure S10: Maximum likelihood phylogeny of exon 4 of the *MHC I* gene in the Syngnathiformes and other fish species using sequences spanning the second half of the exon. Alignment was performed with MUSCLE and subsequent manual editing.**

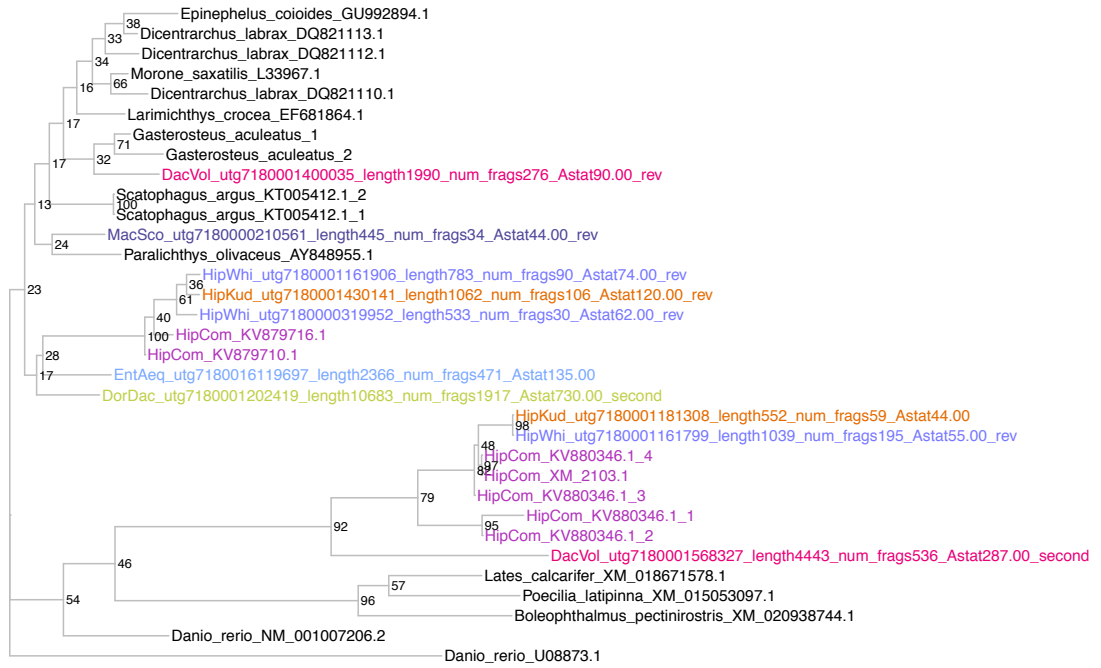

**SI Appendix Figure S11: Maximum likelihood phylogeny of exon 4 of the *MHC II* gene in the Syngnathiformes and other fish species using sequences spanning the first half of the exon. Alignment was performed manually.**

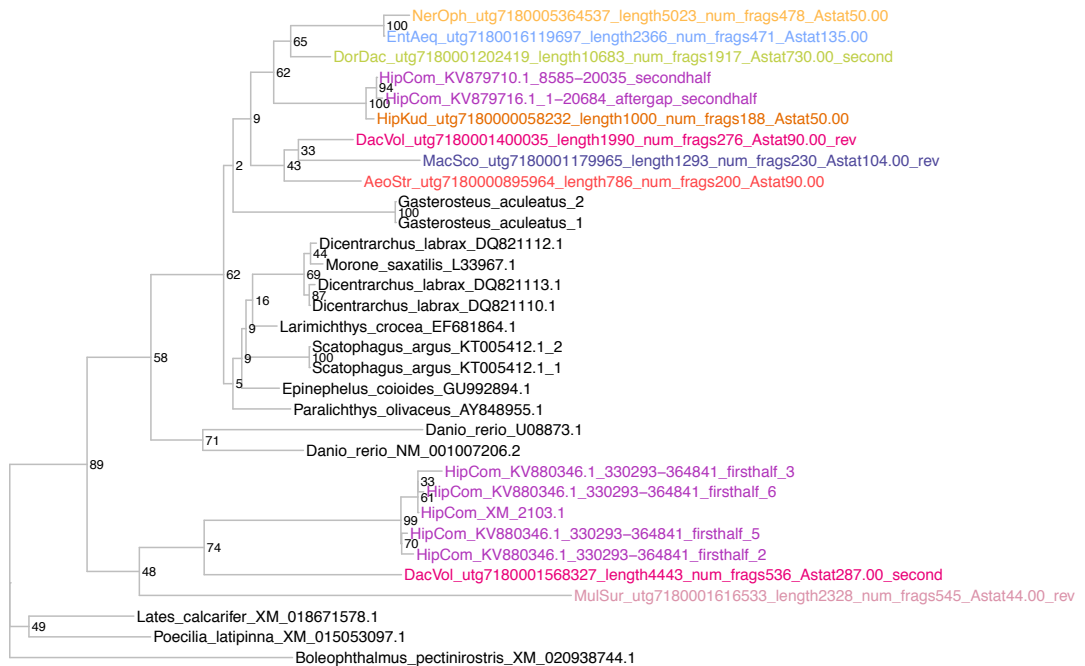

**SI Appendix Figure S12: Maximum likelihood phylogeny of exon 4 of the *MHC II* gene in the Syngnathiformes and other fish species using sequences spanning the second half of the exon. Alignment was performed manually.**



### 5.5.11. MHC II synteny

To obtain safer conclusions upon the loss of the *MHC II*, synteny was characterized. *MHC II* regions are only available in sufficient quality for three reference species; Stickleback, zebrafish and fugu from the Ensembl database. It is exceedingly difficult to assemble *MHC* regions due to recent gene duplications in combination with rampant and ongoing gene conversion(55). The regions were detected using the Ensembl TBLASTN tool with the *MHC II* query sequences listed above. All hit regions were subjected to a reciprocal blast using the NCBI blast tool with default parameters. Regions determined to contain *MHC II* were noted and protein sequences of flanking genes downloaded from Ensembl. These flanking gene protein sequences were used in a TBLASTN towards all Syngnathiformes assemblies together with *MHC II* sequences. In each of the Ensembl reference species, Stickleback, zebrafish and fugu, we detected 6, 3 and 4 *MHC II* regions, respectively. The regions appear to be poorly assembled, but contain some common flanking genes. Synteny was mainly investigated in the high-coverage genomes of *Syngnathus typhle* and *Hippocampus comes*. In *Hippocampus comes* we found 3 putative *MHC II* regions and in *Syngnathus typhle* we investigated local gene synteny in 6 putative *MHC II*-loss regions (SI Appendix Figure S13).

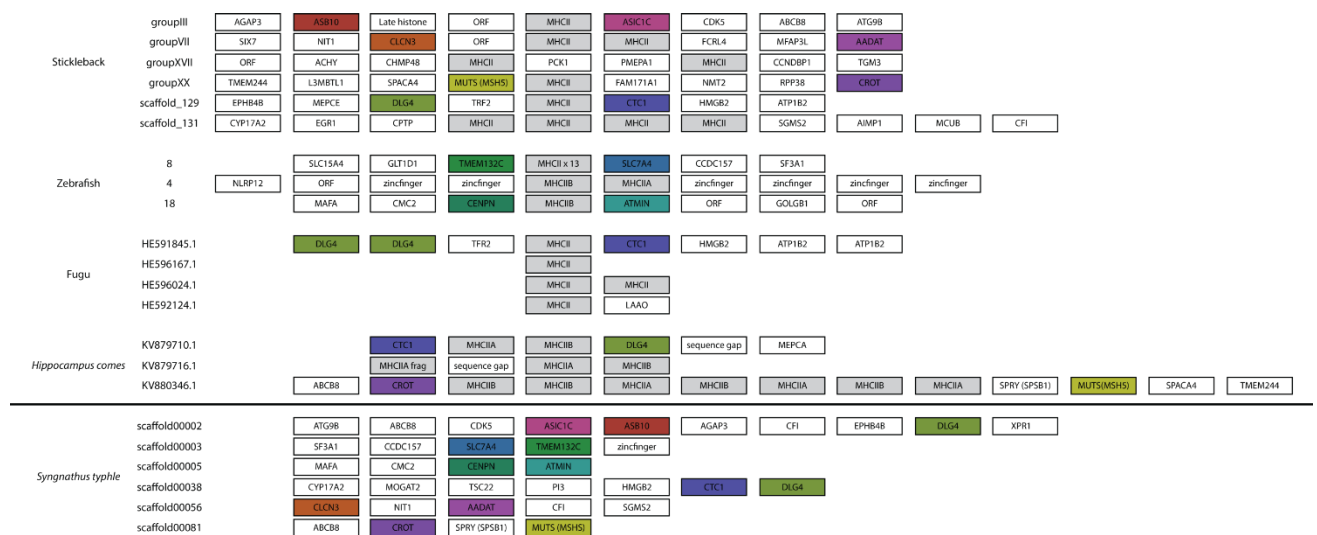

SI Appendix Figure S13: *MHC II* synteny

### 5.5.12. Recombination activating gene 1 and 2 (*RAG1* and *RAG2*)

*RAG1* and *RAG2* facilitate V(D)J recombination. Both *RAG1* and *RAG2* genes appear well conserved in all investigated species, *RAG2* more so than *RAG1*. For *RAG1* there is some

length variation in the first 120 aa, more specifically between aa 46 and aa 92. AA 12 – 310 is likely to interact with importin alpha (SI Appendix Data Set 1: 32RAG1 &33RAG2).

#### 5.5.13. Transporter 1 and 2 ATP binding cassette subfamily B member (*TAP1* and *TAP2*)

*TAP1* and *TAP2* function as heterodimers in the transport of antigens(56). We found either two or three *TAP*-like genes in all investigated species with the exception of 5 fragments in *Entelurus aequoreus* collectively likely representing 3 different genes, and 4 in *Dactylopterus volitans* of which two were identical. The genes from 3 well supported phylogenetic clades, all *TAP1* genes together and two clades with *TAP2* (SI Appendix Data Set 1: 34TAPS\_clean).

## 6. Detection of positive selection across Syngnathiformes

### 6.1. Assess positive selection in pregnancy and immune genes

The large changes in genetic regulation that the evolution of pregnancy requires in developmental and immunological processes can be expected to reflect signs of positive selection on genes as they are recruited to perform novel functions in pregnancy and changed functions in immunity. To assess this, we aimed to detect positive selection in the candidate gene alignments across the Syngnathiformes.

Orthologues of coding sequences for the candidate genes were curated manually as described above and aligned at the codon level. Due to fragmented draft genome sequences, some alignments do not represent the full gene. The bases analyzed are given as a percentage of the zebrafish reference gene in SI Appendix Table S11. For genes that are present in most genomes in two copies, the copies have also been analyzed separately and denoted by numbers, see also gene trees in SI Appendix Data Set 3.

Site-specific, positive selection was assessed using the HYPHY package(57). Gene wide selection was tested using the BUSTED method, a likelihood ratio test that compares a model that allows selection in a chosen foreground branch against a null model without selection. We tested for positive selection across the whole tree and additionally with the syngnathids as the foreground branches, for the latter the Datamonkey web service was employed due to the convenience of foreground branch selection(58). Selection in specific branches was assessed using the adaptive branch-site random effects likelihood (aBSREL) method(59). The gene tree for use in the aBSREL analysis was calculated using

RAxML (ver. 8.2.10) with the GTRCAT model. Selection on specific codons was evaluated with the Mixed Effects Model of Evolution (MEME) method(60). We used a p-value cutoff of 0.05 for all methods.

**SI Appendix Table S11: Summary of the results of the tests for positive selection. Shown are the p-values for the BUSTED test over all sequences, the BUSTED test using the syngnathid sequences as foreground branches, and the sites identified by the MEME test. Bold p-values are significant. In cases where the gene alignment had to be truncated due to missing data the percentage of the gene analyzed is shown for the Zebrafish ortholog as reference, the EnsEBML gene ID for this gene is given.**

| gene                  | function       | p-val BUSTED | p-val LRT BUSTED syn foreground | aBSREL significant branches           | MEME significant sites                                                                                                        | % analyzed zebrafish gene | zebrafish gene ID   |
|-----------------------|----------------|--------------|---------------------------------|---------------------------------------|-------------------------------------------------------------------------------------------------------------------------------|---------------------------|---------------------|
| <i>B2M</i>            | MHC I pathway  | 0.0003       | 0.01                            | Node13                                | 1; 44; 68; 72; 85; 91                                                                                                         | 80,34                     | ENSDARG00000053136  |
| <i>B2M copy 1</i>     | MHC I pathway  | 0.007        | 0.041                           | -                                     | -                                                                                                                             | 80,34                     | ENSDARG00000053136  |
| <i>B2M copy 2</i>     | MHC I pathway  | 0.2511       | 0.155                           | Node14                                | 19; 42; 64; 73; 92                                                                                                            | 80,34                     | ENSDARG00000053136  |
| <i>CD8</i>            | MHC I pathway  | 0            | 0                               | MacSco2, NerOph1, Node26, FisTab1     | 32; 34; 40; 65; 70; 90; 92; 98; 103; 108; 112; 117; 124; 133; 135; 144; 164; 201; 207; 257; 260; 265; 308; 325; 330; 355; 365 | 100,00                    | ENSDARG00000044797  |
| <i>CD8 alpha</i>      | MHC I pathway  | 0            | 0                               | Node5, Node4                          | 16; 18; 28; 32; 36; 43; 54; 56; 114; 116; 122; 123; 125; 129; 142                                                             |                           | ENSDARG00000044798  |
| <i>TAPs</i>           | MHC I pathway  | 0            | 0                               | HipCom1, AeoSr3                       | 16; 141; 171; 208; 277; 325; 422; 452                                                                                         | 70,21                     | ENSDARG00000036787  |
| <i>TAPs copy 1</i>    | MHC I pathway  | 0            | 0                               | HipCom                                | 22; 105; 141; 175; 242; 277; 439                                                                                              | 70,21                     | ENSDARG00000036787  |
| <i>TAPs copy 2</i>    | MHC I pathway  | 0.014        | 0.098                           | aeostr_1_1                            | 14; 49; 85; 96; 101; 124; 130; 164; 189; 208; 283; 325; 412; 432; 443; 499                                                    | 70,21                     | ENSDARG00000036787  |
| <i>AICDA (AID)</i>    | MHC II pathway | 0.4763       | 0.841                           | DorDac                                | 31; 194                                                                                                                       | 97,16                     | ENSDARG00000015734  |
| <i>AIRE</i>           | MHC II pathway | 0            | 0                               | Node10, HipCom, Node20, Node22, Node1 | 5; 76; 109; 119; 128; 137; 139; 150; 158; 161; 277; 305; 336                                                                  | 67,32                     | ENSDARG00000056784  |
| <i>CD4</i>            | MHC II pathway | 0            | 0                               | Node10                                | 2; 39; 46; 60; 66; 99; 105; 110; 145; 160; 161; 210; 211; 222; 254; 301; 345; 372; 388; 428; 445; 457                         | 97,19                     | ENSDARG000000115309 |
| <i>CD74</i>           | MHC II pathway | 0            | 0.071                           | -                                     | 66; 69; 103; 104; 121                                                                                                         | 67,65                     | ENSDARG00000009087  |
| <i>CIITA</i>          | MHC II pathway | 0.0093       | 0.011                           | Node12, HipWhi                        | 4; 14; 26; 28; 37; 59; 111; 116; 177; 312; 385; 389; 397; 400; 409; 489; 537; 543; 585; 602; 609; 615; 668; 723; 739          | 75,39                     | ENSDARG00000090851  |
| <i>RAG1</i>           | MHC II pathway | 0.0005       | 0                               | Node16, Node20                        | 3; 38; 64; 71; 74; 88; 95; 149; 150; 160; 190; 229; 239; 430; 499; 630; 662; 766; 1084; 1088                                  | 100,00                    | ENSDARG00000052122  |
| <i>RAG2</i>           | MHC II pathway | 0.2885       | 0.952                           | -                                     | 213; 455; 476                                                                                                                 | 97,17                     | ENSDARG00000052121  |
| <i>APOA1</i>          | Pregnancy      | 0            | 0                               | Node19                                | 64; 69; 75; 76; 143; 151; 170; 192; 218; 239; 251                                                                             | 100,00                    | ENSDARG00000012076  |
| <i>ATF3</i>           | Pregnancy      | 0.0054       | 0.212                           | -                                     | 93; 99; 125                                                                                                                   | 100,00                    | ENSDARG00000007823  |
| <i>CA4</i>            | Pregnancy      | 0.657        | 0.247                           | -                                     | -                                                                                                                             | 93,79                     | ENSDARG00000043589  |
| <i>CEBPB</i>          | Pregnancy      | 0.1835       | 0.682                           | -                                     | 53; 109; 140                                                                                                                  | 100,00                    | ENSDARG00000042725  |
| <i>DLX3b cluster1</i> | Pregnancy      | 0.4015       | 1                               | -                                     | -                                                                                                                             | 100,00                    | ENSDARG00000014626  |
| <i>DLX3b cluster2</i> | Pregnancy      | 0            | 0                               | Node10                                | 15; 41; 75; 105; 240; 241; 242; 245; 247; 248; 255; 263; 268; 271; 276                                                        | 100,00                    | ENSDARG00000014626  |
| <i>JUNB</i>           | Pregnancy      | 1            | 0.927                           | -                                     | 204                                                                                                                           | 100,00                    | ENSDARG00000074378  |
| <i>JUNB copy 1</i>    | Pregnancy      | 0.0301       | 0.372                           | -                                     | 128; 200                                                                                                                      | 100,00                    | ENSDARG00000074378  |
| <i>JUNB copy 2</i>    | Pregnancy      | 1            | 1                               | -                                     | 201                                                                                                                           | 100,00                    | ENSDARG00000074378  |
| <i>PRKCD</i>          | Pregnancy      | 0.0444       | 0.008                           | Node31, MulSur1                       | 167; 173; 184; 186; 196; 203; 305; 312; 328; 438                                                                              | 81,46                     | ENSDARG00000070651  |

|                           |            |        |       |                               |                                                                                                                                 |        |                    |
|---------------------------|------------|--------|-------|-------------------------------|---------------------------------------------------------------------------------------------------------------------------------|--------|--------------------|
| <b>PRKCD copy 1</b>       | Pregnancy  | 0.0317 | 0.026 | -                             | 53; 179; 185; 212; 218; 219; 225                                                                                                | 81,46  | ENSDARG00000070651 |
| <b>PRKCD copy 2</b>       | Pregnancy  | 0.5162 | 0.749 | -                             | 13; 498                                                                                                                         | 81,46  | ENSDARG00000070651 |
| <b>PTGFRN</b>             | Pregnancy  | 0      | 0     | SynRos                        | 101; 111; 273; 403; 405; 416; 449                                                                                               | 98,15  | ENSDARG00000075505 |
| <b>RHAG</b>               | Pregnancy  | 1      | 0.932 | -                             | 47; 48                                                                                                                          | 45,87  | ENSDARG00000019253 |
| <b>TF</b>                 | Pregnancy  | 0      | 0     | Node5, HipCom, AeoStr, FisTab | 5; 8; 15; 76; 95; 124; 155; 158; 162; 165; 203; 205;<br>261; 284; 332; 339; 366; 470; 488; 531; 538; 580;<br>628; 629; 633; 637 | 96,14  | ENSDARG00000016771 |
| <b>hemoglobin beta</b>    | Hemoglobin | 0      | 0     | synsco                        | 30; 91                                                                                                                          | 100,00 | ENSDARG00000109554 |
| <b>hemoglobin alpha 1</b> | Hemoglobin | 0.0266 | 1     | -                             | 20; 30; 78                                                                                                                      | 57,75  | ENSDARG00000110250 |
| <b>hemoglobin alpha 2</b> | Hemoglobin | 0      | 0     | dacvol_1_1_1, dacvol_1_1      | 3; 6; 20; 21; 85                                                                                                                | 100,00 | ENSDARG00000079305 |
| <b>hemoglobin alpha 3</b> | Hemoglobin | 0      | 0.003 | -                             | 5; 20; 45; 53; 73                                                                                                               | 41,03  | ENSDARG00000079078 |

## 6.2. Signs of positive selection on immune system genes in syngnathids

We have identified major re-arrangements in the repertoire of immune genes that are considered standard for gnathostome immunity and now examined whether or not this is also associated with accelerated evolution in some of the important target genes. To begin with, *AICDA* (*AID*), responsible for the unique receptor diversity in B-cells, was lost in *Syngnathus*, but is retained in the *Hippocampus* species. We find no signs of positive selection with the BUSTED method with *Hippocampus* species as the foreground branch, however, aBSREL identifies possible positive selection in *Doryrhamphus dactylophorus* belonging to the *Nerophinae*. The *AIRE* gene, involved in negative selection of T-cells, is present in all Syngnathiformes and shows signs of positive selection in syngnathids (BUSTED likelihood ratio test). The aBSREL method indicates selection in multiple branches of the gene tree, specifically in *Hippocampus*, however, not in *Syngnathus*. This was expected given that *AIRE* is not expressed in *S. typhle*. *CD4*, absent in *Syngnathus*, shows significant positive selection overall, and aBSREL suggests that selection occurs in the branch leading to two seahorse species, *H. kuda*, and *H. comes*. Also absent in *Syngnathus*, the MHC II activator *CIITA* is positively selected in *Hippocampus*, as shown by BUSTED with the three *Hippocampus* species as the foreground branch, and aBSREL. This indicates that upon the loss of exons in *CD74* and the potentially resulting non-functional MHC II response in *Hippocampus* and *Syngnathus*, *CIITA* and *CD4* may have acquired a novel function in the seahorses. The products of the recombination-activating genes *RAG1* and *RAG2* facilitate V(D)J recombination in vertebrates. BUSTED detected selection in *RAG1*, but not *RAG2*. This is localized by aBSREL to *H. kuda* and *H. whitey*, and also *N. ophidion* and *E. aequoreus*, but not *Syngnathus*. *CD74* is lacking functional domains in *Syngnathus* and *Hippocampus*. When testing the whole gene tree with BUSTED, the LRT test shows significant selection, but not so when only the syngnathids were used as the foreground branch.

The gene encoding  $\beta$ 2-Microglobulin, *B2M*, exists in two or three paralogs in the genomes analysed, named *B2M-1* and *B2M-2* in SI Appendix Table S11. It is a component of MHC I, and the BUSTED test finds evidence for selection only in *B2M-1*, however, the aBSREL test does not. Conversely, the BUSTED p-value is not significant for *B2M-2*, but the aBSREL methods shows selection in the syngnathids (Node 12, SI Appendix Table S11). For the *CD8* gene, *Syngnathus* and *Hippocampus* have lost the *beta* chain, however, the *alpha* chain

shows traces of positive selection in the syngnathids according to the BUSTED test. *TAP1* and *TAP2* function as a heterodimer in transport of antigens. The BUSTED test indicates positive selection in both genes, also with the syngnathids as foreground. The aBSREL test, however, identified selection in *H. comes* for *TAP1* only, and in *A. strigosus* for *TAP2*, this test has less power than BUSTED.

Generally, we find strong signs of positive selection in the candidate genes involved in immunity that were selected for analysis in contrast to randomly selected genes (SI Appendix Table S11). This suggests that the immune system is coevolving with male pregnancy in the Syngnathiformes and supports our results of major immune system rearrangement in the syngnathids.

### 6.3. Pregnancy genes and signs of positive selection

To identify genes with a function in male pregnancy, candidate genes known to be involved in female pregnancy that are also differentially expressed during pipefish pregnancy, were analysed for signs of positive selection across the Syngnathiformes but also specifically within syngnathids.

Apolipoprotein A-I, produced by the *APOA1* gene, is a cholesterol transporter involved in hormone production in the corpus luteum. BUSTED indicates positive selection in the species we tested, and also specifically in the syngnathids. The aBSREL test, however, only detected selection in the branches leading to species without male pregnancy.

The *ATF3* gene produces a transcription factor that is involved in corpus luteum development and regression. While the BUSTED test is significant for positive selection overall, the results for BUSTED with the syngnathids as foreground shows that the selection impacted species other than the syngnathids.

Carbonic anhydrase 4 (*CA4*) is an enzyme involved in a large number of metabolic processes, among them putatively the paternal-embryonal transport of CO<sub>2</sub> and ammonia. We find no positive selection in the species tested using the BUSTED method.

*CEBPB* produces a transcription factor important in regulating immune genes, especially in early embryogenesis. We find no indication of positive selection on this gene in our species set.

The transcription factor coding gene *JUNB* is involved in several pathways, including the estrogen pathway. It is present in two copies in most of the genomes analysed here, positive selection was detected in neither copy.

The protein kinase encoded by *PRKCD* is present in two copies and has been shown to be involved in the sperm acrosome and embryo implantation. The first *PRKCD* copy is detected as having undergone positive selection in the syngnathids by the BUSTED test, but there is no significant result for aBSREL.

*PTGFRN* codes for a protein involved in the prostaglandin pathway, and is positively selected in the syngnathids as shown with the BUSTED test, aBSREL identifies the *S. rostellatus* branch as having experienced positive selection, specifically.

The gene Rh associated glycoprotein *RHAG* gene, responsible for ammonium transport in mammals, does not seem to be under positive selection from our tests.

Only in *PRKCD* and *PTGFRN* seem to be under positive selection within the syngnathids. We could thus only find limited support that selection acts on these genes that are potentially involved in syngnathid male pregnancy.

#### 6.4. Oxygen transport and Hemoglobin genes (*Hb*)

Oxygen transport from parent to the embryo is a key requirement for a successful pregnancy. To assess evolution of oxygen transport with male pregnancy in syngnathids, hemoglobin genes were analysed. While teleosts usually have a wide diversity of hemoglobin genes (*Hbs*) to cope with different environments and different life stages(61-63), Syngnathiformes feature only one *beta*-globin gene, except *M. surmuletus* having two copies (SI Appendix Figure S14-16). Syngnathiformes, such as most teleost species, possess a swimbladder filled with oxygen due to a highly specialized *Hb* isoform that can deliver oxygen against a concentration gradient, a phenomenon known as the Root effect(64, 65). Although the molecular mechanisms responsible for the Root effect are still not completely understood, it has been hypothesized that substitutions on one copy of the *beta*-globin is responsible, while the other *beta*-globin(s) have a normal oxygen affinity to allow efficient gas exchange in the remainder of the body(65). However, as most of the Syngnathiformes have only one *beta*-globin gene, this points to a different gene being responsible for the Root effect, possibly the *alpha*-globin gene. All of the Syngnathiformes species investigated had several copies of *alpha*-globin, with *alpha 3* and *alpha 4* being shared between all species (SI Appendix Figure S14 and S16). Further analyses into the function of these genes could shed light on the evolution of the Root effect in teleosts.

We also discovered a notable difference in the *Hb* repertoire of Syngnathiformes species with an inverted (*Syngnathus*) or sealed (*Hippocampus*) brood pouch being the only



species to have *alpha 1* and *alpha 2*, with an apparent loss of *alpha 2* in *H. kuda* and *H. whitei* (SI Appendix Figure S14). Furthermore, *Hippocampus* and *Syngnathus* species do not have the *Hb* variants *alpha 5* and *alpha 6*, suggesting that species with full male pregnancy have a unique *Hb* repertoire. We can only speculate on the functional implications. In mammals, *Hb* isoforms with a higher oxygen affinity due to specific *beta*-globin genes are expressed at the embryonic and fetal life stages(66). Examining the gene expression results from various life stages in *S. typhle* shows that only *alpha 4* is expressed in embryos and larvae, whereas adults express several types including *alpha 4* and *alpha 2* at high levels and some *alpha 1* and *alpha 3*. At this stage, we lack sufficient experimental replication to further analyse expression differences at various life stages. However, it is important to note that in Syngnathiformes pregnancy adaptation might involve switching between *alpha*-globins. This is in contrast to mammals where a switch occurs between *beta*-globins as an adaptation to pregnancy.

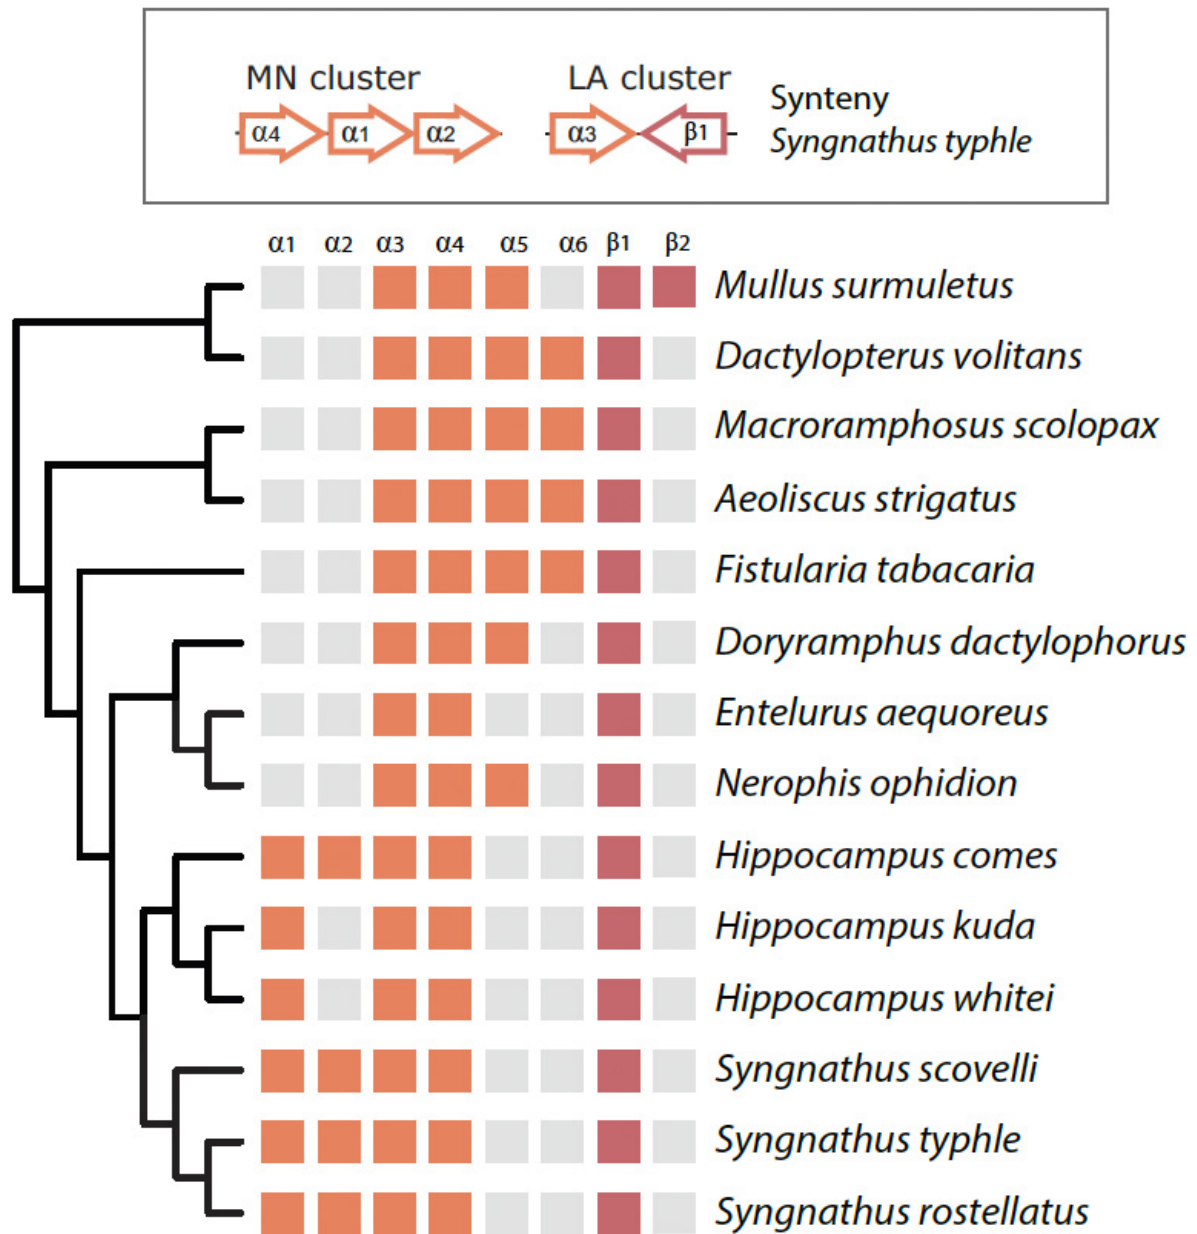

**SI Appendix Figure S14: Overview of hemoglobin repertoire in Syngnathiformes.** Top panel shows syntenic gene clusters for the *Hb* gene clusters MN and LA in *S. typhle*. The lower panel shows *Hb* genes mapped on a phylogenetic species tree, with *alpha*-globins in orange and *beta*-globins in red and grey indicating absence.

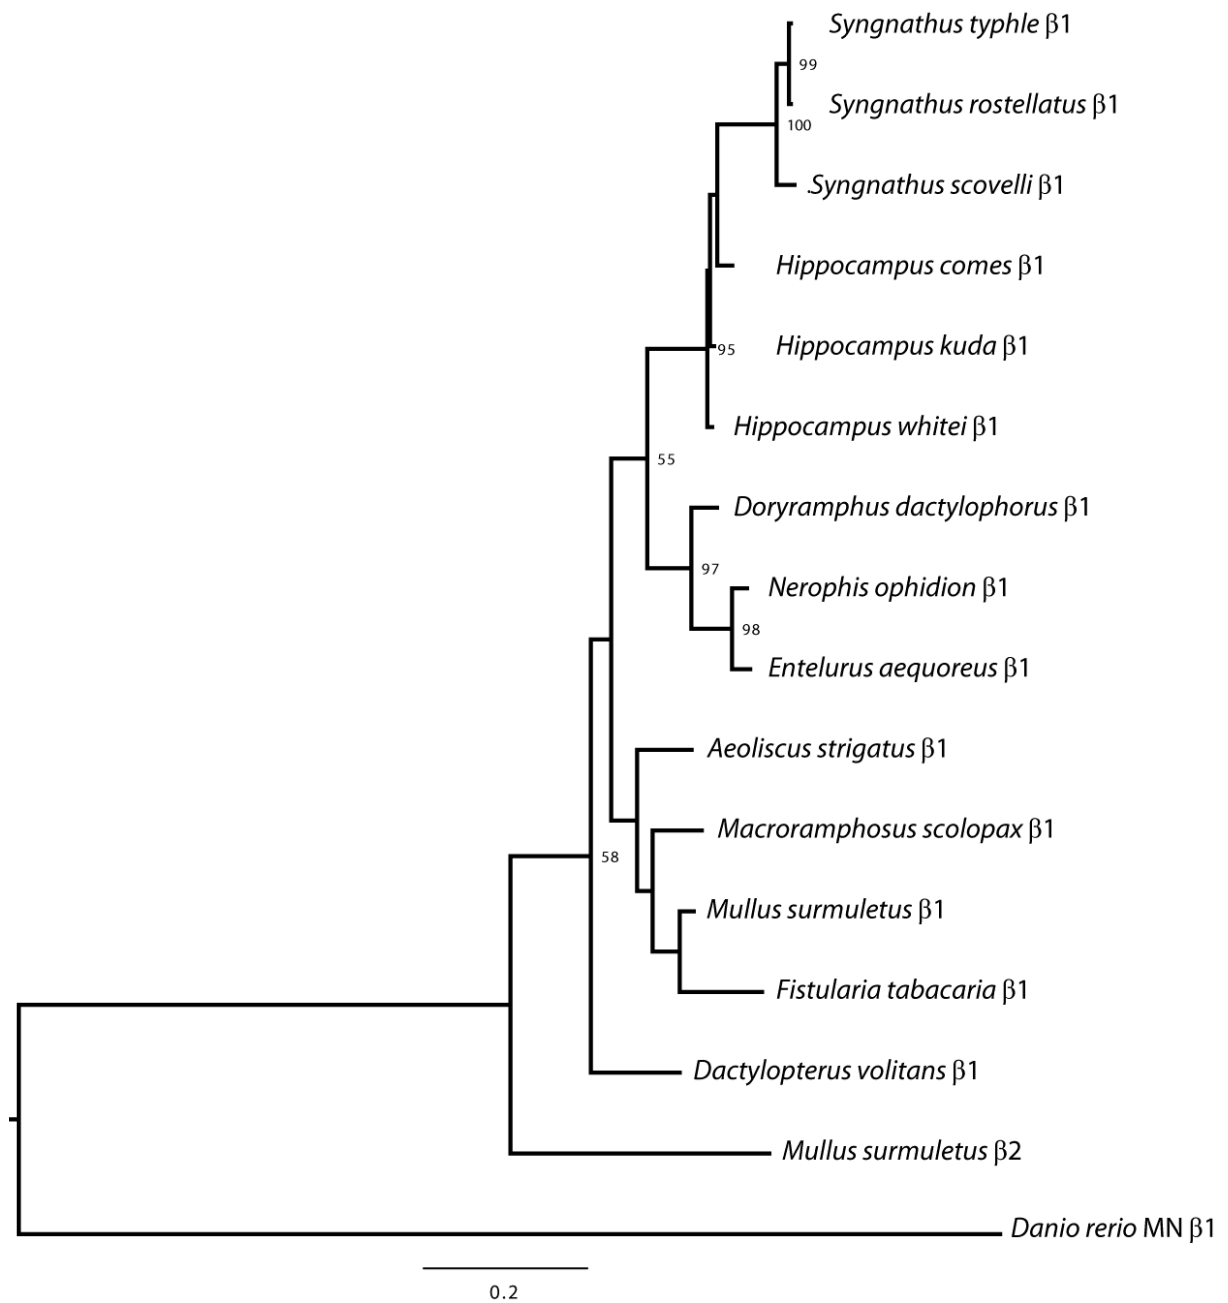

**SI Appendix Figure S15: Phylogenetic tree of *beta-globin* genes constructed using ML with 1000 bootstrap replicates. Numbers at nodes show percentage bootstrap values >50.**

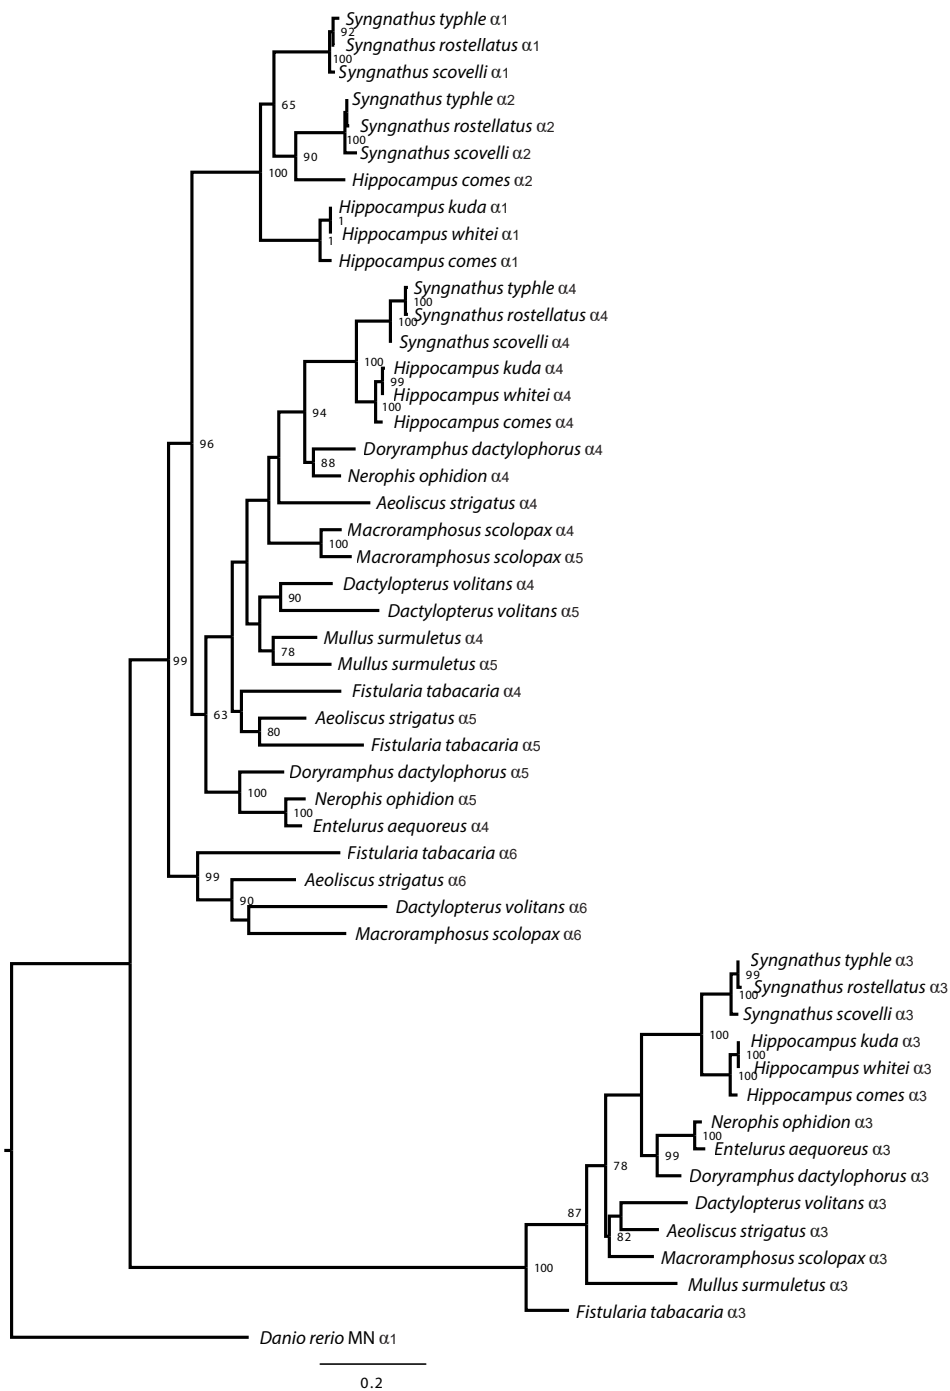

**SI Appendix Figure S16: Phylogenetic tree of *alpha-globin* genes constructed using ML with 1000 bootstrap replicates. Numbers at nodes show percentage bootstrap values >50.**

## 7. Differential gene expression (transcriptome sequencing) in *S. typhle*

### 7.1. Sampling and experimental design, RNA extraction, Sequencing

In order to assess which genes are differentially expressed during male pregnancy and during the development of the brood pouch tissue, we sequenced the transcriptome (RNAseq) of the pipefish *Syngnathus typhle* in the following tissue types (i) brood pouch tissue of males with an undeveloped brood pouch, (ii) a developed pouch, (iii) the pouch tissue at early pregnancy and (iv) the pouch tissue at late pregnancy. For this purpose, *S. typhle* males were kept in our laboratories in groups of 10 individuals. Fish with undeveloped brood pouches, developed pouches, those in early pregnancy stage and those in late pregnancy stage were dissected upon killing fish in a water bath with an overdose of MS22. From all fishes, pouch tissue was dissected and stored in RNA later upon further processing. All samples were taken at the same day, five replicates per developmental stage. These libraries were also used as reference transcriptomes for the *S. typhle* genome annotation.

Total RNA was extracted using the Machery-Nagel NucleoSpin 96 RNA kit following the manufacturer's protocol, and RNA quality was checked with an Experion Automated Electrophoresis system (Bio-Rad). Samples were prepared for sequencing using the Illumina TruSeq RNA sample preparation Kit, according to the standard protocol. Quality control and quantification of libraries was examined by using the LapChip GX (Caliper) and the HT DNA High Sensitivity Kit. For sequencing, indexed libraries were diluted to 2nmol/ L and pooled. To control quality of the sequencing run, a 1% PhiX control library (PhiX Control Kit v3, Illumina) was added to each lane. cDNA libraries were paired-end sequenced on the Illumina HiScan SQ platform for 2\*101 bp. We sequenced 20 indexed samples (as part of a 96 sample setup) distributed over one flowcell. Raw image data were transformed and de-multiplexed using CASAVA 1.8 software.

### 7.2. Differential gene expression analysis *Syngnathus typhle*

For the expression analysis the “Tuxedo” suite of tools were used(67). Raw RNA reads were mapped against the genome assembly using TopHat2 (v2.0.12) (ref(68)), with an average mapping rate of 74% across samples. The mapping data was used by Cufflinks (v2.2.1) to calculate splice sites and generate transcripts for each sample separately. The transcripts were then merged into a unified transcriptome by Cuffmerge. Expression was

calculated using Cuffdiff (v2.2.1) with a FDR-corrected p-value of < 0.05 (ref(67)), plots and lists of differentially expressed genes were generated with the CummeRbund R package (v2.24.0) (ref(69)).

Differential gene expression was calculated pairwise against the undeveloped pouch as reference tissue. All differentially expressed genes were searched for potential functions via homology, using reported functions in female pregnancy of mammals, in the squamate reptile *Chalcides ocellatus* (70) and in male pregnancy of *S. scovelli* (3) and *H. abdominalis* (71). These homologous genes are in the following displayed in ***bold italics***. Gene expression data were compared in more detail to RNAseq data collected during male pregnancy of the pipefish *Syngnathus scovelli* (3).

### 7.3. Convergent evolution of female and male pregnancy

A total of 73M reads were sequenced, with an average of 3.6M reads per sample. In total we identified 116 genes that were differentially expressed in male pregnancy in *S. typhle*, which also are reported to display a function in female pregnancy in reptiles and mammals (SI Appendix Figure S12).

In mammals, trophoblast interferon (*IFNT*) is key in initiating early pregnancy. *IFNT* disrupts the uterine release of prostaglandin that inhibits luteolysis and maintains a critical progesterone/estrogen level(72) required for the survival of the developing embryo. An inflammation response was suggested to be important for successful implantation in mammalian pregnancy (73). The key genes mediating this specific inflammation at implantation in mammals, ***IL6R (M/P)***, ***TNF (M)*** and ***PTGS2 (M)*** (73, 74), were upregulated during pouch development in pipefish. The implantation of the eggs further takes place via activation of the mTOR pathway. To initiate the maternal pregnancy, *IFNT* induces downstream signal transducers and further transcription activators such as *STAT1*, *STAT2*, *IRF1*(75, 76). The enhanced *IRF1* transcription, in particular, has substantial immune-modulating effects mediating embryo tolerance and preventing its rejection. *IRF1* induces the expression of *IL-4*, reduces the lymphocyte proliferation in response to *IL-2*(77) and changes *MHC I* expression on trophoblasts by silencing classical *MHC I* expression and enhancing the non-classical *MHC I* expression on trophoblasts over the JAK /STAT pathway via *IRF2* and *CASP3*. The *MHC II* expression is silenced on trophoblasts via the *PSMB* gene. In addition, mammalian pregnancy involves a shift from Th1 (proinflammatory, tissue damage: *IFN-gamma*) towards a Th2 immunological environment (IgE promotion, anti-inflammation and eosinophilic

responses: *IL-4, IL-5, IL-13, IL-10*). This shift was shown to reduce inflammation (cytotoxic T-cells and proinflammatory interleukins (*IL-1a, IL-2, IL-6*)) in favour of B-cell activation (78).

### 7.3.1. Genes of the immune system

During the development of the brood pouch and during male pregnancy several genes of *Syngnathus typhle* were differentially expressed that modulate the maternal immune system during mammalian pregnancy. The critical shift from Th1 towards Th2 immune response during mammalian pregnancy, i.e. the suppression of inflammatory responses, was also identified in pipefish male pregnancy. ***Epx*** with its dual function in mammalian placenta development and in eosinophil activation was upregulated during pouch development in *S. typhle* and remained so during pregnancy(79). The same pattern was apparent for ***TNF***, involved in cytokine production (Th1) but also in uterine receptivity and placental development(80). Moreover, ***IL-6*** was upregulated during pouch development but not during pregnancy, in mammals the ***IL-6*** downregulation during pregnancy is essential for placental functioning and the immunological tolerance of the embryo(81). ***CLCF1, KLF4*** and ***CEBPB*** that are all involved in inflammation response were upregulated during pipefish pregnancy(82). ***CEBPB*** that represses *MHC* expression but facilitates Th2 immune responses was consistently upregulated in both pipefish species and the seahorse(71), which is in line with the shift towards Th2 type immune response. In mammals ***KLF4*** is key for the maintenance of gestation(83), and ***CEBPB*** for the regulation of decidual gene expression(84). Consistent with mammalian pregnancy, the proinflammatory interleukins ***IL1*** and ***IL2*** were downregulated during pouch development, and the latter gene also during pregnancy. In mammals ***IL1*** induces ***CLCF1*** expression that mediates the onset of labours at term, a mechanism that resembles an inflammation(82). Also ***RPL18A***, responsible for T-cell proliferation (Th1) and known to be downregulated in lizard pregnancy(70) is downregulated during pipefish pregnancy. Three genes involved in Th2 immune response are downregulated in pipefish tissues, ***MEF2C*** (maturation of lymphocytes and important in mammalian embryo development by transcribing Bisphenol A)(85) is downregulated during pouch development, in the seahorse ***MEF2C*** was upregulated after pregnancy during parturition(71). Expression of Interleukin secretion genes ***S100A13*** and ***IL20RB*** is lowered during pipefish pouch development (***S100A13***) and pregnancy (***S100A13, IL20RB***), which is consistent with seahorse pregnancy(71) but in contrast to reptile pregnancy(70). The transcriptional repressor ***PRDM1*** (lymphocyte maturation and proliferation (Th2)) defines in mammals

a lineage-restricted progenitor cell population contributing to placental growth and morphogenesis(86) and is upregulated in pipefish brood pouch development, while **MEF2C** that enhanced lymphocyte maturation (85) was downregulated. Gelsolin (**GSN**) that is present in midtrimester amniotic fluid, that binds to LPS and inhibits the induction of **TNF** (87), was upregulated during pipefish pouch development.

Similar to mammals, during pipefish pregnancy **CASP3** was upregulated, while we find a downregulation of **STAT1** and **IRF1**. In mammals, binding of trophoblast interferon (**IFNT**) activates **STAT1** that via **IRF1**, **IRF2** and **CASP3** modifies the MHC class I pathway(88, 89) to maintain immunological tolerance. **CASP3** is a progesterone responsible for the uterine quiescence necessary during pregnancy. At the onset of labors, **CASP3** levels decrease in mammals(90). In pipefish a series of putative homologous genes to mammals involved in antigen recognition, presentation and processing are differentially expressed during pregnancy such as the *Class I histocompatibility antigen* **F10**, **TAP1**, **H2-K1** (two orthologues), **IRF1**, **IRF8**, **MR1** (4 orthologues). In mammals during early pregnancy, **TAP1** is increasingly expressed on placenta-specific trophoblasts, and plays an important role in the prevention of the embryos from maternal immune attacks(91). As a barrier between the mother and the embryo trophoblasts build a layer of tissue in the placenta. They only express non-classical **MHCI** that does not induce a non-self-reaction against the embryo. Most other genes involved in adaptive immune defence (*Class I histocompatibility antigen* **F10**, **H2-K1** (two orthologues), **IRF1**, **IRF8**, **MR1** (4 orthologues), **FUT9**) are silenced during mammalian pregnancy to protect the embryonal allograft(92, 93). Also in pipefish the expression of those genes is downregulated during early pregnancy, which also holds true for other genes with a function in antigen processing (**Ig kappa chain V**, **Ig mu chain C**, **IGLC1**, **FUT9**). All those genes are involved in the MHC I pathway. The only gene with an original function in antigen processing that was upregulated during pipefish pregnancy is the MHC II invariant chain **CD74**. However, due to the ambiguous sequence of CLIP, **CD74** cannot function as invariant chain of MHC II. In humans, the silencing of **CD74** during pregnancy is key for maintaining the acceptance of the semi-allogenic embryo(94).



### 7.3.2. Expression patterns of prostaglandin, progesterone, and the estrogen pathway

A shift in the expression of genes involved in the biosynthesis of prostaglandin (PTG) is well established in mammalian menstrual cycle and pregnancy. The activity of these genes prevents the degradation of the corpus luteum at the onset of pregnancy. These genes were also differentially regulated in the pipefish pouch development and pregnancy. ***PTGFRN***, ***PTGIS*** and ***PTGS2*** that are all involved in the biosynthesis of prostaglandin with a role in mammalian pregnancy are upregulated during pouch development. In mammals ***PTGFRN*** is upregulated during early pregnancy(95), similar to ***PTGIS*** that converts prostaglandin to a functional form during pregnancy(96), in contrast to ***PTGS2*** that is increased at luteolysis, but suppressed during pregnancy(97). ***PTGFR*** is downregulated during pipefish pouch development, but upregulated during early pregnancy. Also ***PTGS1*** is upregulated during early pipefish pregnancy, while ***PTGDR2*** and ***PTGER4*** are downregulated during pipefish late pregnancy. In mammals ***PTGFR*** is high during luteolysis but suppressed later in pregnancy(97), while ***PTGS1*** is also upregulated during mammalian pregnancy(97).

***APOA1*** is a key gene for the corpus luteum development. ***APOA1*** expression decreases over the corpus luteum regression in menstrual cycle but is highly expressed in the early corpus luteum at the time of embryo implantation and post-implantation(98). In contrast, ***ATF3*** is only involved in the regression of the corpus luteum(99). In line with these expectations from mammals, in all three syngnathids examined (*Syngnathus typhle*, *Syngnathus scovelli* and *Hippocampus abdominalis*), ***APOA1*** and ***ATF3*** (the latter only in *S. typhle* and *S. scovelli*) expression was upregulated during early and late pregnancy(3, 71).

An upward shift in progesterone level is critical for the survival of the developing embryo. Two key transcription factors of the estrogen pathway (***JUN*** and ***JUNB***)(100) were upregulated during *S. typhle* pregnancy, the latter one (***JUNB***) was also upregulated during *S. scovelli* pregnancy(3). Various genes regulated by progesterone are suggested to be involved in mammalian pregnancy. ***DKK2*** as an antagonist of WNT signaling, mediating reproductive events, is downregulated during pouch development and early pregnancy(97). ***NFATC4*** that can block pregnancy-induced cardiac hypertrophy in humans(101) was downregulated both during pouch development and early pregnancy in pipefish. ***HAVCR1*** expression can induce preeclampsia and increase inflammation(102)

in mammals, in pipefish it was downregulated during pouch development and pregnancy. Triggered by the shift of mammalian estrogen levels, **RCN3** expression is induced in the endometrium in mammals(103), consistent with a constant upregulation during pouch development and pregnancy in pipefish. The action of the insulin-like growth factors (IGF) important for tissue homeostasis, regulation of cell proliferation, differentiation and survival during embryonic development(104) are mediated by six secreted high-affinity binding proteins (*IGFBPs*) that, however, also have an independent function(105). Two *IGFBPs* were upregulated during pouch development (**IGFBP6**) or pregnancy (**IGFBP1**). **HSD11B1** and **HSD11B2** convert cortisol into cortisone and are inhibited by progesterone(106). **HSD11B1** was upregulated during pouch development, while **HSD11B2** was downregulated during late pregnancy, the opposite pattern was observed in seahorse pregnancy(71).

### 7.3.3. Parent – fetus transport

For the development of the embryo, the transport of nutrients and oxygen from the pregnant parent to offspring is essential. The two transport genes **SLC2A1** and **SLC4A1** are susceptible to a shift in progesterone level. In mammalian pregnancy they have a dual function, mediating the maternal-fetal transport (**SLC2A1**: glucose(107); **SLC4A1**: CO<sub>2</sub> transport and bicarbonate balance(108)), as well as activating targets of the mTOR pathway that stimulates proliferation, migration, gene expression and mRNA translation by the conceptus(109, 110). While **SLC2A1** was upregulated during pouch development, **SLC4A1** was downregulated during pouch development and pregnancy.

Two putative homologs to mammalian transport genes were upregulated during pouch development and early pipefish pregnancy: **HK2**, involved in glycolytic and glycerol lipid biosynthesis(111) and **AQP**, responsible for water homeostasis in reproductive cells, an impairment of its function can result in attenuated male and female fertility(112). Other genes with a putative function in transport were already previously described to being differentially expressed during seahorse pregnancy: **GLT8D** that could be involved in membrane transport, **MAT2A** as well as **CALR**, suggested to play a role in paternal-embryonal transport, were significantly upregulated during pipefish pouch development and both pipefish and seahorse pregnancy, similar to **CA4** that is involved in CO<sub>2</sub> and ammonia transport(71). Key candidates representing convergent pregnancy evolution are the fatty acid binding proteins encoded by *FABP* genes. In mammals they are supposed

to be involved in fatty acid delivery to the fetus, and potentially play a role in fetal protection from hypoxia and are under control of the hypoxia inducible factor (HIF)(113). In pregnant reptiles and seahorses, they are differentially regulated as well. In *S. typhle* **FABP3** is upregulated during pouch development and early pregnancy, **FABP1** is upregulated during pregnancy, while **FABP6** is downregulated during late pregnancy. During pipefish pregnancy, **TF**, a gene that is known to be involved in transport to the fetus in mammals(114) and **RHAG** involved in ammonium transport in mammals were upregulated. **CLDN5** belonging to human tight junctions factors is downregulated during pipefish late pregnancy(115).

#### 7.3.4. mTor pathway and implantation

In mammals, the mTOR pathway regulates the expression of genes responsible for implantation. Three genes homologous to the mammalian counterparts of the mTOR pathway were downregulated either during pouch development (**DDIT4**) or during pipefish pregnancy (**TSC1**). In mammals, **DDIT4** downregulation activates the mTOR signaling pathway, its downregulation during pregnancy enhances fetal growth(116). **TSC1** was suggested to mediate conceptus growth over the mTOR pathway(117). Already during pouch development, we observed a downregulation of **LGALS3**. As a member of the galectins, **LGALS3** was in mammals suggested to play a role in uterine receptivity and implantation by modulating the maternal immune response and to be receptive to progesterone(118). All other genes with a known function in implantation of mammals were upregulated in pouch development, such as **PRKCD** that is in male sperm important to penetrate the zona pellucida, in females it supports the embryo implantation(119). Also **DAG1** was upregulated during pouch development. **DAG1** is a target for evolutionary host-pathogen interactions at the maternal-fetal interface. As such, it is important for implantation but also serves as a receptor for viral recognition that can cause placental infections(120). Further, **RAC1** & **RHOA** (the invasion of the maternal decidua by trophoblasts requires those two genes for the establishment of a normal placenta), **COL5A1** & **COL6A3** (involved in the implantation of the egg and the muscle development of the embryo(121, 122)) and **IST1** (affects cell cycle and differentiation during pre-implantation phase(123)) were upregulated during pouch development. During pipefish early pregnancy, however, **PLAU** (involved in signal transduction(124)) and **RHOA** expression decrease, while **COL5A1** and **COL6A3** remain upregulated, as well as **COL12A1** (involved in progesterone pathway that maintains the myometrical quiescence and

blocks myometrical contractility(125)). During late pregnancy, **PRKCD** and **DAG1** were again upregulated, as well as **RAC1** and **COL5A1**.

#### 7.3.5. Endometrium and placenta development

Many of the hypothetically homologous genes with a role in placenta and endometrium development in mammals were differentially expressed in the development of the pouch and during male pregnancy of *S. typhle*. Several placenta-specific genes were upregulated during pouch development, such as **AHNAK**(126), **FURIN** (important for the invasion and migration of trophoblast cells during early mammalian pregnancy(127)), **FN1** (involved in proliferation of trophoblastic cells and the tissue organization of the placenta(128)) and **TNFRSF21** (role in placental immune defence(129)). The latter remains upregulated during early pregnancy in *S. typhle*, as well as **DLX3B**, a regulator of mammalian placental growth and **EPAS1** (involved in placental blood flow), which is also differentially expressed during reptile pregnancy and seahorse male pregnancy(70, 71, 130). In late pipefish pregnancy, in addition to **DLXB** and **TNFRSF21**, also **PRDM1** (a transcriptional repressor that defines a lineage-restricted progenitor cell population contributing to placental growth and morphogenesis(86)), and **FRRS1** (involved in potential placental abruption(131)) were upregulated, while **BNIP3** was downregulated.

#### 7.4. Gene co-option for male pregnancy in *Syngnathus typhle*

We compared differential gene expression during pouch development and male pregnancy (early and late pregnancy) from RNA isolated in brood pouch tissue against tissue of undeveloped pouches in order to study which genes were co-opted for male pregnancy. We only considered genes with a clear expression change (2fold) in at least one of the possible 3 comparisons, in total 220 genes (SI Appendix Table S13). Genes in *italics* have not been shown to have a function also in female pregnancy. Genes in **bold italics** have known functions in female pregnancy and have already been discussed in the section 7.3.

All differentially expressed genes were assigned to categories. Immune system (29), developmental processes (59), apoptosis (7), cell differentiation (14), gene expression (8), membrane (132), metabolic process (12), protein modification (132), stress regulation (16), signaling (5), transport (7), sensory reaction (27), or another/ unknown function (24).

#### 7.4.1. Genes of the immune system

We identified 14 innate immune system genes that were differentially expressed during pouch development or male pregnancy. During pouch development, we find a downregulation of *ADSSL1C* (involved in antimicrobial peptide synthesis) and the antimicrobial peptide *PLE3*, the pro-inflammatory cytokine *MIF*, *FHL2* (inflammation response), *S100A13* (responsible for stress-induced export of IL1a), *JUND* (involved in LPS response) and *Gal lectin* that mobilizes neutrophils. *PIA2G4A* and *IL17REL* (both inflammation response), *EPX* that is involved in bacterial fragmentation and lysing over eosinophil activity, *TNF* & *GREM2* (both cytokines), and *TNFAIP8L1* are upregulated during pouch development. *PLE3* and *S100A13* remained downregulated throughout pregnancy while *FHL2* shifted towards downregulation during pregnancy. *C6* (complement component C6) and *JUND* were upregulated during early and *EPX* and *TNF* during late pregnancy.

15 genes with putative function in the adaptive immune system were differentially expressed during pouch development or pregnancy. Three genes involved in antigen binding were downregulated during pregnancy (*IGLC1*, *IGkappa*, *IgMu*), the latter two also during pouch development. In contrast, *FUT9* and *CD74* both also involved in antigen processing are upregulated during pouch development. The invariable chain of the MHC II *CD74* remained consistently upregulated during pregnancy. However, as stated above, *CD74* cannot be functional due to losses of exons and very divergent sequences. During pouch development, one other gene of the adaptive immune system, *CHIA* was downregulated, lowering T-cell proliferation. Three genes involved in lymphocyte response were upregulated during pouch development: *PRDM1* (B-cell maturation), *CLCF1* (B-cell stimulation) and *GIMAP4* (lymphocyte apoptosis), as well as *TNFRSF21* with a function in T-cell proliferation. One gene enhancing B-cell development, *FCRL5* was lowered during early pregnancy, while *CLCF1* remained upregulated over pregnancy. During late pregnancy also *GPR97* and *MFNG* (both responsible for B-cell differentiation) were downregulated as well as *NFATC4* and *HAVCR1* (T-cell development). This suggests that both antigen processing and lymphocyte responses were affected by male pregnancy.

#### 7.4.2. Genes involved in developmental processes

The majority of differentially expressed genes during pregnancy are involved in developmental processes (89 genes). Among those, genes can be divided into sub-categories, corresponding to putative functions in fertilization and pregnancy (18 genes), digestive system (2 genes), bone development (8 genes), brain development (5 genes), embryo/ organism development (20), muscle development (5 genes), cardiovascular system (5 genes) and muscle contraction (21 genes).

Among the genes involved in pregnancy and fertilization **NOXO1** (angiotensin induced enlargement of the uterus), **ADAMTS1** (female fertilization, ureteropelvic junction), **RAPGEF3** (sperm development), **ADM2** (trophoblast invasion and migration), **MKK** (male gonad development), **PRELP** (gonad development), **SRC** (regulation of increased heart rate during pregnancy), **PTGS2** (in mammals prevents corpus luteum degradation over prostaglandin pathway), **HSD11B1L** (uterine receptivity), **CUZD1** and **IGFBP6** (both important for initiation of labors) were upregulated during pouch development compared to undeveloped pouch tissue. **CUZD1** and **ADAMTS1** remained upregulated also during pregnancy. Induced gene expression was also observed in **KLF9** and **FAM64A**, two genes important for endometrium development, and **APOA1**, which prevents the corpus luteum from degradation at the onset of a pregnancy.

Only **DKK2** (anterior-posterior axis development, an antagonist of WNT signalling, mediating reproductive events) and two copies of **Tropomyosin alpha-1 chain** (important for in utero development) were downregulated during pouch development. **DKK2** remained downregulated also during pregnancy, as well as **CLDN5** (responsible for tight junction). **PLAC8** (mammalian placenta development), **PTGFR** (in mammals prevents corpus luteum degradation over prostaglandin pathway) and **Klf9** mediating inflammation during pregnancy.

Among the 8 genes playing a role in bone formation, 4 were downregulated during pregnancy (**PDLIM7**, **PDLIM3**, **SMAD9**, **KLHL41**), and 2 were upregulated (**COL11A1**, **COL2A1** (all collagen alpha chain)). During pregnancy **SOST**, **COL11A1** and **COL10A1** were upregulated. This most likely suggests an important function of those genes during pregnancy rather than during pouch development.

Genes mediating heart development were consistently downregulated either during pouch development (*HEY1, SMYD1, SMYD2B*) or during pregnancy (*HEY1, ANKRD1*) suggesting an important function for the development of the cardiovascular system during pouch development and pregnancy. The only gene involved in digestive system development was in one copy highly downregulated during pouch development but then in the other copy upregulated during pregnancy (*BHMT*).

Among genes with a putative function in embryonal development, *HCEA* (egg hatching), *GPX4* (embryogenesis), *ARG8, CKM* (tissue energy transduction), *EPGN* (EPGF response) were downregulated during pouch development. In contrast, *ALDH1A2, TGFA, STX2, TMEM79, MSCX, ENAH, SEMA3G, SOX7* and *ZNF513* were upregulated in the same treatment. During early pregnancy *ALDH1A2, CRABP2* and *BGLAP* were upregulated and not a single embryogenesis gene was downregulated, while during late pregnancy the only downregulated embryogenesis gene was *TTC36* (otolith morphogenesis). During late pregnancy *ALDH1A2, MSXS* (ear morphogenesis), *NMRK2* (myoblast differentiation), *MEF2D* (transcription factor). *MYL2* and *BGLAP* were upregulated.

*REG1B, KCNN2* and *CDKN3* were the three genes involved in brain development that had a higher expression during pouch development. In contrast, *DCHS1* (neuronal cell differentiation) was downregulated. During pregnancy *SERPINI1* (nervous system organization) was highly upregulated and *PLDX1* (spinal cord development) was downregulated. The two genes with a function in keratinization were upregulated either during pouch development (*CNFN-B*) or during pregnancy (*ALOX8*).

All but one gene (*SMTNL2*) involved in muscle development showed a decreased expression during pouch development (*JPH2, TNNI2, ENO3, MURC*), while during pregnancy no change in expression could be observed.

Genes mediating muscle contraction were highly lowered in their expression during pouch development (*MYLPF, ACTC1, TTN, MYOM2, TRDN, MYOSIN H, MYOM2, ACTA1, TNNC, ACTC, CASQ1, MYLPF, MYOLCHS, MYOLCHC*). During early pregnancy *CASQ2, MYLPF* and *ACTC* were still downregulated, while during late pregnancy *MYOLCHC* was upregulated. This suggests a decreased muscle activity during pouch development.

**SI Appendix Table S12: Genes with a function in mammalian (M), reptile (R) or seahorse (S) pregnancy that were differentially expressed during pipefish brood pouch development or pipefish pregnancy. Comparison was: developed pouch against undeveloped brood pouch tissue, early pregnant pouch tissue against undeveloped brood pouch tissue and late pregnant pouch tissue against undeveloped pouch tissue. Positive values indicate upregulation in undeveloped pouch tissues.**

| Gene name          | full gene name                                                | Function category              | homologous | id                                             | devel_vs_undev | e-preg_vs_undev | l-preg_vs_undev | ref   |
|--------------------|---------------------------------------------------------------|--------------------------------|------------|------------------------------------------------|----------------|-----------------|-----------------|-------|
| <i>CD74</i>        | H-2 class histocompatibility antigen gamma chain              | immune                         | M/ R       | maker-scaffold00049-augustus-gene-8.11-        | -2,0334        | -2,7864         | -3,2362         | (94)  |
| <i>CEBPB</i>       | CCAAT/ enhancer-binding protein beta                          | immune                         | M/ S       | snap_masked-scaffold00001-processed-gene-82.40 | 0,0000         | -1,1242         | -0,9878         | (84)  |
| <i>F3</i>          | Tissue Factor                                                 | immune                         | M/ S       | maker-scaffold00002-augustus-gene-85.35        | 0,0000         | 0,0000          | 1,7166          | (133) |
| <i>GSN</i>         | Gelsolin                                                      | immune                         | M/ R       | genemark-scaffold00022-processed-gene-1.11-    | -0,9516        | 0,0000          | 0,0000          | (87)  |
| <i>H2-K1</i>       | H-2 class I histocompatibility antigen, K-Q alpha chain       | immune                         | M          | genemark-scaffold00040-processed-gene-18.19-   | 0,0000         | 0,9503          | 0,0000          | (92)  |
| <i>H2-K1</i>       | H-2 class I histocompatibility antigen, K-Q alpha chain       | immune                         | M          | genemark-scaffold00303-processed-gene-0.11-    | 0,0000         | 0,8641          | 0,0000          | (92)  |
| <i>I hist anti</i> | Class I histocompatibility antigen                            | immune                         | M          | maker-scaffold00303-augustus-gene-0.46-        | 0,0000         | 1,0500          | 0,0000          | (134) |
| <i>IL1B</i>        | Interleukin-1 beta                                            | immune                         | M          | maker-scaffold00023-augustus-gene-34.52-       | 1,1526         | 0,0000          | 0,0000          | (75)  |
| <i>IL20RB</i>      | Interleukin-20 receptor subunit beta                          | immune                         | R/ S       | maker-scaffold00002-snap-gene-44.66            | 0,0000         | 0,8893          | 0,0000          | (71)  |
| <i>IL2RG</i>       | Cytokine receptor common subunit gamma                        | immune                         | M          | maker-scaffold00008-augustus-gene-47.57        | 1,4007         | 1,6468          | 1,3735          | (75)  |
| <i>IL6R</i>        | Interleukin-6 receptor subunit alpha                          | immune                         | M          | maker-scaffold00081-augustus-gene-3.57         | -0,9301        | 0,0000          | 0,0000          | (75)  |
| <i>Klf4</i>        | Kruppel-like factor 4                                         | immune / embryonal development | M/ S       | snap_masked-scaffold00048-processed-gene-11.20 | 0,0000         | -2,0034         | -2,4307         | (83)  |
| <i>MEF2C</i>       | Myocyte-specific enhancer factor 2C                           | immune                         | M/ S       | maker-scaffold00050-augustus-gene-14.90        | 1,3723         | 0,0000          | 0,0000          | (85)  |
| <i>MEF2D</i>       | Myocyte-specific enhancer factor 2D                           | immune                         | M          | maker-scaffold00058-snap-gene-5.52-            | -1,7967        | 0,0000          | -2,1529         | (135) |
| <i>MR1</i>         | Major histocompatibility complex class I-related gene protein | immune                         | M          | maker-scaffold00024-augustus-gene-22.54-       | 0,9626         | 1,4606          | 1,9281          | (93)  |
| <i>MR1</i>         | Major histocompatibility complex class I-related gene protein | immune                         | M          | maker-scaffold00040-augustus-gene-18.60-       | -1,1531        | 0,0000          | 0,0000          | (93)  |
| <i>MR1</i>         | Major histocompatibility complex class I-related gene protein | immune                         | M          | maker-scaffold00303-augustus-gene-0.47-        | 0,0000         | 0,8694          | 0,0000          | (93)  |
| <i>MR1</i>         | Major histocompatibility complex class I-related gene protein | immune                         | M          | maker-scaffold00303-augustus-gene-0.48-        | 0,0000         | 1,2369          | 0,0000          | (93)  |
| <i>NFATC4</i>      | Nuclear factor of activate T cells, cytoplasmic 4             | immune                         | M          | maker-scaffold00002-augustus-gene-71.51-       | 1,0427         | 1,4050          | 2,2371          | (101) |
| <i>RPL18A</i>      | 60S ribosomal protein L18a                                    | immune                         | R          | maker-scaffold00064-augustus-gene-12.94-       | 0,0000         | 0,0000          | 0,8577          | (70)  |
| <i>TAP1</i>        | Antigen peptie transporter 1                                  | immune                         | M          | maker-scaffold00058-snap-gene-12.59-           | 0,0000         | 0,9055          | 0,0000          |       |
| <i>TNFRSF21</i>    | Tumor necrosis factor receptor superfamily member 21          | immune / placenta              | M          | maker-scaffold00058-augustus-gene-13.61-       | -2,8935        | 0,0000          | -3,0368         | (136) |
| <i>STAT1</i>       | Signal transducer and activator of transcription 1-alpha/beta | immune / in utero development  | M          | genemark-scaffold00127-processed-gene-3.25-    | 0,0000         | 0,9079          | 0,0000          | (88)  |
| <i>HAVCR1</i>      | Hepatitis A virus cellular receptor 1 homolog                 | immune / progesterone          | M          | genemark-scaffold00008-processed-gene-22.3-    | 1,2544         | 1,9961          | 2,3375          | (102) |



|                     |                                                                     |                                           |      |                                                     |         |         |         |                        |
|---------------------|---------------------------------------------------------------------|-------------------------------------------|------|-----------------------------------------------------|---------|---------|---------|------------------------|
| <b>IRF1</b>         | Interferon regulatory factor 1                                      | immune/<br>estrogen                       | M    | maker-scaffold00008-augustus-gene-12.49-            | 0,0000  | 0,9705  | 0,0000  | (88)                   |
| <b>IRF8</b>         | Interferon regulatory factor 8                                      | immune/<br>estrogen                       | M    | maker-scaffold00005-augustus-gene-14.34-            | 0,0000  | 1,0972  | 1,5468  | (56)                   |
| <b>FUT9</b>         | Alpha-(1,3)-fucosyltransferase 9                                    | immune/<br>implantation                   | M    | maker-scaffold00010-snap-gene-27.42-                | -3,0834 | 0,0000  | 0,0000  | (137)                  |
| <b>STAT1</b>        | Signal transducer and activator of transcription 1-<br>alpha/beta   | immune/ in<br>utero<br>development        | M/ M | maker-scaffold00067-augustus-gene-4.51-             | 0,0000  | 1,0695  | 1,3682  | (88)                   |
| <b>CLCF1</b>        | Cardiotrophin-like cytokine factor 1                                | immune/ labor                             | M    | maker-scaffold00013-snap-gene-49.40-                | -2,8488 | -3,2282 | -3,3566 | (82)                   |
| <b>EPX</b>          | Eosinophil peroxidase                                               | immune/<br>placenta                       | M    | maker-scaffold00022-augustus-gene-39.76-            | -4,0782 | -1,5275 | -2,1218 | (Knud<br>sen,<br>1997) |
| <b>BTG1</b>         | B-cell translocation gene 1 protein                                 | conceptus<br>growth                       | M    | maker-scaffold00112-augustus-gene-2.23-             | -0,9321 | 0,0000  | 0,0000  | (138)                  |
| <b>DUSP5</b>        | Dual specificity protein phosphatase 5                              | conceptus<br>growth                       | S    | maker-scaffold00033-augustus-gene-1.29              | 0,0000  | -1,2488 | 0,0000  | (139)                  |
| <b>MAPK3</b>        | Mitogen-activated protein kinase 3                                  | conceptus<br>growth                       | M    | maker-scaffold00004-snap-gene-59.75-                | -1,3088 | 0,0000  | -1,1125 | (140)                  |
| <b>ODC1</b>         | Ornithine decarboxylase                                             | conceptus<br>growth                       | M    | genemark-scaffold00010-processed-gene-6.8-          | 0,0000  | 0,0000  | -0,8851 | (141)                  |
| <b>TSC1</b>         | Hamartin                                                            | conceptus<br>growth                       | M    | genemark-scaffold00027-processed-gene-1.45-         | 1,1008  | 0,8962  | 1,3468  | (117)                  |
| <b>TSPAN1</b>       | Tetraspanin-1                                                       | conceptus<br>growth                       | M    | maker-scaffold00045-augustus-gene-11.30-            | 0,0000  | 0,0000  | -4,9276 | (142)                  |
| <b>CDKN3</b>        | Cyclin-dependent kinase inhibitor 3                                 | embryonal<br>development                  | M    | augustus_masked-scaffold00010-processed-gene-17.38- | -2,1323 | 0,0000  | 0,0000  | (143)                  |
| <b>ENPP1</b>        | Ectonucleotide pyrophosphatase                                      | embryonal<br>development                  | M/ S | maker-scaffold00060-snap-gene-13.81                 | 0,0000  | 0,0000  | 0,8806  | (144)                  |
| <b>FAM20C</b>       | Family with sequence similarity 20                                  | embryonal<br>development                  | M/ S | maker-scaffold00004-snap-gene-8.38                  | 0,0000  | 0,0000  | 0,9938  | (145)                  |
| <b>FKBP10</b>       | Peptidyl-prolyl cis-trans isomerase FKBP1A                          | embryonal<br>development                  | M    | maker-scaffold00051-augustus-gene-10.63-            | -0,8530 | 0,0000  | 0,0000  | (146)                  |
| <b>FAM64A</b>       | Family with sequence similarity 64                                  | endometrium                               | M    | maker-scaffold00008-snap-gene-21.86-                | 0,0000  | -2,4650 | 0,0000  | (147)                  |
| <b>KLF9</b>         | Kruppel-like factor 9                                               | endometrium                               | M    | maker-scaffold00027-augustus-gene-13.35-            | 0,0000  | 2,3370  | 1,6691  | (148)                  |
| <b>RCN3</b>         | Reticulocalbin-3                                                    | endometrium /<br>progesterone             | M    | augustus_masked-scaffold00047-processed-gene-6.11-  | -1,9337 | -2,0191 | -2,1853 | (103)                  |
| <b>DKK2</b>         | Dickkopf-related protein 2                                          | endometrium/<br>progesterone              | M    | maker-scaffold00034-augustus-gene-5.34-             | 3,2396  | 1,2866  | 2,8916  | (97)                   |
| <b>JUN</b>          | Transcription factor AP-1                                           | estrogen                                  | M    | augustus_masked-scaffold00011-processed-gene-21.36- | 0,0000  | -1,3252 | 0,0000  | (100)                  |
| <b>JUNB</b>         | Transcription factor jun-B                                          | estrogen                                  | M/ S | augustus_masked-scaffold00053-processed-gene-9.6    | 0,0000  | -1,7124 | -1,4201 | (100)                  |
| <b>ADAMTS<br/>1</b> | A disintegrin and metalloproteinase with<br>thrombospondin motifs 1 | female<br>fertilization                   | M    | maker-scaffold00039-snap-gene-14.31-                | -2,1682 | 0,0000  | -3,0538 | (149)                  |
| <b>PCK2</b>         | Phosphoenolpyruvate carboxykinase (GTP)                             | gene expression<br>/ metabolic<br>process | M/ R | genemark-scaffold00018-processed-gene-38.2-         | -2,8818 | -1,8954 | -2,6371 | (150)                  |

|                  |                                                     |                                     |         |                                              |         |         |         |       |
|------------------|-----------------------------------------------------|-------------------------------------|---------|----------------------------------------------|---------|---------|---------|-------|
| <b>RPLP2</b>     | 60S acidic ribosomal protein P2                     | gene expression                     | R       | maker-scaffold00102-augustus-gene-2.35-      | 0,0000  | 0,0000  | 0,9219  | (70)  |
| <b>PRELP</b>     | Prolargin                                           | gonad development                   | M       | maker-scaffold00042-snap-gene-17.52-         | -2,2768 | 0,0000  | 0,0000  | (151) |
| <b>SRC</b>       | Proto-oncogene tyrosine-protein kinase Src          | heart rate regulation               | M       | maker-scaffold00025-snap-gene-8.40-          | -2,7005 | 0,0000  | 0,0000  | (152) |
| <b>FOS</b>       | Proto-oncogene c-FOS                                | implantation                        | M       | genemark-scaffold00077-processed-gene-7.22-  | 0,0000  | -3,0759 | -2,4711 | (153) |
| <b>LGALS3</b>    | Galectin-3                                          | implantation                        | M       | maker-scaffold00205-snap-gene-0.72-          | 0,8557  | 0,0000  | 0,0000  | (118) |
| <b>PLAU</b>      | Urokinase-type plasminogen activator                | implantation                        | M/S     | maker-scaffold00015-augustus-gene-48.136     | 0,0000  | 1,0030  | 0,0000  | (154) |
| <b>PRKCD</b>     | Protein kinase C delta type                         | implantation                        | M/ S    | genemark-scaffold00062-processed-gene-2.8-   | -1,6277 | 0,0000  | -1,2271 | (119) |
| <b>RAC1</b>      | Ras-related protein Rac1                            | implantation                        | M       | maker-scaffold00015-augustus-gene-6.53-      | -1,8460 | 0,0000  | -1,4744 | (117) |
| <b>RHOA</b>      | Transforming protein RhoA                           | implantation                        | M       | maker-scaffold00020-augustus-gene-5.50-      | 0,0000  | 0,7965  | 1,0854  | (117) |
| <b>RHOA</b>      | Transforming protein RhoA                           | implantation                        | M       | maker-scaffold00123-augustus-gene-3.70-      | -0,8305 | 0,0000  | 0,0000  | (117) |
| <b>DAG1</b>      | Dystroglycan                                        | implantation / immune               | M/ S    | maker-scaffold00001-augustus-gene-94.19      | -1,7515 | 0,0000  | -1,3516 | (120) |
| <b>IST1</b>      | IST1 homolog                                        | implantation/ cell cycle            | M/ S    | maker-scaffold00102-augustus-gene-2.32       | -1,8704 | 0,0000  | 0,0000  | (123) |
| <b>COL12A1</b>   | Collagen alpha-1 (XII) chain                        | implantation/ muscle development    | M/ R    | maker-scaffold00046-augustus-gene-18.81-     | 0,0000  | -1,0186 | 0,0000  | (125) |
| <b>COL5A1</b>    | Collagen alpha-1 (V) chain                          | implantation/ muscle development    | M       | maker-scaffold00050-snap-gene-3.39-          | -1,2435 | -1,2225 | -0,9425 | (121) |
| <b>COL6A3</b>    | Collagen alpha-3 (VI) chain                         | implantation/ muscle development    | M/ R    | maker-scaffold00014-snap-gene-12.69-         | -1,2294 | -1,0016 | 0,0000  | (122) |
| <b>BTF3</b>      | Transcription factor BTF3                           | in utero development                | M/ R    | maker-scaffold00050-augustus-gene-7.45-      | 0,0000  | 0,0000  | 0,9253  | (155) |
| <b>DDIT4</b>     | DNA damage-inducible transcript 4 protein           | in utero development                | M/ R/ S | maker-scaffold00015-augustus-gene-12.55      | 1,6882  | 0,0000  | 0,0000  |       |
| <b>PGR</b>       | Progesterone receptor                               | in utero development                | M/ R    | genemark-scaffold00009-processed-gene-58.22- | 0,0000  | -1,0004 | 0,0000  | (117) |
| <b>APOA1</b>     | Apolipoprotein A-I                                  | in utero development / progesterone | M/ R/ S | genemark-scaffold00009-processed-gene-42.17- | 0,0000  | -4,6493 | -5,4239 | (98)  |
| <b>ATF3</b>      | Cyclic AMP-dependent transcription factor ATF-3     | in utero development / progesterone | M/ S    | maker-scaffold00046-augustus-gene-16.69      | 0,0000  | -1,5039 | -1,6576 | (99)  |
| <b>CASP3</b>     | Caspase-3                                           | in utero development / progesterone | M/ S    | maker-scaffold00012-snap-gene-37.32          | -1,1179 | 0,0000  | 0,0000  | (90)  |
| <b>HSD11B1 L</b> | Hydroxysteroid 11-beta-dehydrogenase 1-like protein | in utero development / progesterone | M       | maker-scaffold00011-augustus-gene-7.29-      | -2,4510 | 0,0000  | 0,0000  | (106) |
| <b>HSD11B2</b>   | Corticosterod 11-beta-dehydrogenase isozyme 2       | in utero development / progesterone | M/ S    | maker-scaffold00036-snap-gene-1.71           | 0,0000  | 0,0000  | 1,1837  | (106) |

|                 |                                                             |                                     |         |                                                    |         |         |         |       |
|-----------------|-------------------------------------------------------------|-------------------------------------|---------|----------------------------------------------------|---------|---------|---------|-------|
| <b>IGFBP1</b>   | Insulin-like growth factor-binding protein 1                | in utero development / progesterone | M       | maker-scaffold00090-augustus-gene-1.37-            | 0,0000  | -1,1028 | -0,9644 | (156) |
| <b>IGFBP6</b>   | Insulin-like growth factor-binding protein 6                | in utero development / progesterone | M       | maker-scaffold00001-augustus-gene-86.42-           | -3,5975 | 0,0000  | 0,0000  | (157) |
| <b>SH3D19</b>   | SH3 domain-containing protein 19                            | labor                               | M/ S    | maker-scaffold00038-augustus-gene-18.55            | 0,0000  | 0,0000  | 1,2053  | (158) |
| <b>TGFB3</b>    | Transforming growth factor beta-3 proprotein                | labor                               | M       | maker-scaffold00010-augustus-gene-54.34-           | -1,7547 | 0,0000  | -1,2334 | (157) |
| <b>PDE4B</b>    | Phosphodiesterase                                           | labor / uterus relaxant             | S       | maker-scaffold00002-snap-gene-49.81                | -1,3441 | 0,0000  | -1,1591 | (159) |
| <b>ACTA</b>     | Actin                                                       | placenta                            | M/ R/ S | augustus_masked-scaffold00199-processed-gene-0.56  | 0,0000  | -1,8485 | 0,0000  | (130) |
| <b>ADM2</b>     | Adrenomedullin                                              | placenta                            | M       | maker-scaffold00029-augustus-gene-25.43-           | -3,0992 | -1,8960 | -2,5006 | (160) |
| <b>AHNAK</b>    | Neuroblast differentiation-associated protein AHNAK         | placenta                            | M/ R    | maker-scaffold00013-snap-gene-47.40-               | -1,9331 | 0,0000  | 0,0000  | (126) |
| <b>BNIP3</b>    | BCL2-interacting protein 3                                  | placenta                            | M       | maker-scaffold00043-augustus-gene-19.80-           | 1,6160  | 2,0576  | 2,5098  | (161) |
| <b>CREBL2</b>   | cAMP-responsive element-binding protein-like 2              | placenta                            | M       | maker-scaffold00064-augustus-gene-13.135-          | 0,9927  | 1,1813  | 1,0872  | (162) |
| <b>DLX3B</b>    | Homeobox protein Dlx3b                                      | placenta                            | M/ S    | maker-scaffold00015-augustus-gene-4.41             | 0,0000  | -0,7628 | -0,8589 | (71)  |
| <b>FRRS1</b>    | Ferric-chelate reductase 1                                  | placenta                            | M/ S    | genemark-scaffold00002-processed-gene-68.36        | -2,3810 | 0,0000  | -1,9142 | (131) |
| <b>FURIN</b>    | Furin                                                       | placenta                            | M       | maker-scaffold00005-augustus-gene-17.32-           | -0,9000 | 0,0000  | 0,0000  | (127) |
| <b>GHR</b>      | Growth hormone receptor                                     | placenta                            | M       | maker-scaffold00063-snap-gene-13.80-               | 0,0000  | 0,9393  | 0,0000  | (163) |
| <b>GPX4</b>     | Phospholipid hydroperoxide glutathione peroxidase           | placenta                            | M/ R    | maker-scaffold00011-augustus-gene-14.50-           | 2,2665  | 0,0000  | 0,0000  | (164) |
| <b>PLAC8</b>    | Placenta-specific gene 8 protein                            | placenta                            | M       | maker-scaffold00050-augustus-gene-0.51-            | 0,0000  | 1,8074  | 2,1520  | (165) |
| <b>PRDM1</b>    | PR domain zinc finger protein 1                             | immune/ placenta                    | M       | augustus_masked-scaffold00058-processed-gene-3.7-  | -3,2592 | 0,0000  | -2,1695 | (86)  |
| <b>FN1</b>      | Fibronectin                                                 | placenta                            | M/ S    | snap_masked-scaffold00014-processed-gene-18.32-    | -1,2274 | 0,0000  | 0,0000  | (128) |
| <b>TNFRSF21</b> | Tumor necrosis factor receptor superfamily member 21        | immune / placenta                   | M       | genemark-scaffold00135-processed-gene-1.14-        | -2,2489 | -1,2337 | -1,5501 | (129) |
| <b>SLC9A1</b>   | Sodium/ hydrogen exchanger 1                                | regulation                          | M/ S    | genemark-scaffold00035-processed-gene-13.8         | -0,9568 | 0,0000  | 0,0000  | (166) |
| <b>NR4A3</b>    | Nuclear receptor subfamily 4 group A member 3               | sperm                               | M/ S    | maker-scaffold00081-augustus-gene-6.41             | -3,4252 | 0,0000  | 0,0000  | (167) |
| <b>CALCOCO1</b> | Calcium-binding and coiled-coil domain-containing protein 1 | transcriptional activator           | S       | maker-scaffold00067-snap-gene-9.48                 | 0,0000  | 2,4180  | 0,0000  | (71)  |
| <b>AQP3</b>     | Aquaporin-3                                                 | transport                           | M/ S    | maker-scaffold00027-augustus-gene-21.29            | -0,9670 | 0,0000  | 0,0000  | (112) |
| <b>CA4</b>      | Carbonic anhydrase 4                                        | transport                           | S       | maker-scaffold00008-augustus-gene-25.70            | 0,0000  | -1,6192 | -1,9324 | (71)  |
| <b>CALR</b>     | Calreticulin                                                | transport                           | S       | maker-scaffold00159-augustus-gene-1.75             | -1,0409 | 0,0000  | -1,5459 | (71)  |
| <b>CLDN5</b>    | Claudin-5                                                   | transport                           | M/ R    | augustus_masked-scaffold00027-processed-gene-3.10- | 0,0000  | 0,0000  | 2,1372  | (115) |
| <b>FABP1</b>    | Fatty acid-binding protein, liver                           | transport                           | M/ R/ S | maker-scaffold00030-augustus-gene-13.52            | 0,0000  | -2,0520 | -3,1418 | (113) |
| <b>FABP3</b>    | Fatty acid-binding protein, heart                           | transport                           | M/ R/ S | augustus_masked-scaffold00165-processed-gene-0.29  | -1,6310 | -1,3859 | 0,0000  | (113) |
| <b>FABP6</b>    | Fatty acid-binding protein, ileal (gastrotropin)            | transport                           | M/ R/ S | maker-scaffold00012-snap-gene-35.32-               | 0,0000  | 0,0000  | 1,1277  | (113) |
| <b>GLT8D2</b>   | Glycosyltransferase 8 domain-containing protein 2           | transport                           | S       | maker-scaffold00029-augustus-gene-25.49            | -1,5780 | 0,0000  | 0,0000  | (71)  |
| <b>HK2</b>      | Hexokinase-2                                                | transport                           | M       | maker-scaffold00003-augustus-gene-56.20-           | -0,8645 | 0,0000  | 0,0000  | (111) |
| <b>MAT2A</b>    | S-adenosylmethionine synthase isoform type-2                | transport                           | S       | maker-scaffold00022-augustus-gene-39.77            | -0,9045 | 0,0000  | 0,0000  | (71)  |
| <b>RHAG</b>     | Ammonium transporter Rh type A                              | transport                           | M/ S    | maker-scaffold00046-augustus-gene-3.64             | 0,0000  | 0,0000  | -1,3216 | (168) |
| <b>SLC2A1</b>   | Solute carrier family 2                                     | transport                           | M       | maker-scaffold00025-augustus-gene-15.30-           | -0,9338 | 0,0000  | 0,0000  | (107) |
| <b>SLC4A1</b>   | Anion exchange protein                                      | transport                           | M/ S    | genemark-scaffold00015-processed-gene-35.30        | 1,3207  | 0,9607  | 1,3026  | (169) |
| <b>TF</b>       | Serotransferrin                                             | transport                           | M/ S    | maker-scaffold00096-augustus-gene-3.52             | 0,0000  | -2,5512 | -1,7603 | (114) |

|               |                                       |                                           |      |                                             |         |         |        |       |
|---------------|---------------------------------------|-------------------------------------------|------|---------------------------------------------|---------|---------|--------|-------|
| <b>NOXO1</b>  | NADPH oxidase 1                       | uterine<br>receptivity                    | M    | genemark-scaffold00004-processed-gene-7.16- | -1,0101 | 0,0000  | 0,0000 | (170) |
| <b>NOXO1</b>  | NADPH oxidase 1                       | uterine<br>receptivity                    | M    | maker-scaffold00051-augustus-gene-13.52-    | -2,5288 | 0,0000  | 0,0000 | (170) |
| <b>PTGDR2</b> | Prostaglandin D2 receptor 2           | uterine<br>receptivity /<br>prostaglandin | M    | genemark-scaffold00055-processed-gene-8.7-  | 0,0000  | 0,0000  | 1,3894 | (97)  |
| <b>PTGER4</b> | Prostaglandin E2 receptor EP4 subtype | uterine<br>receptivity /<br>prostaglandin | M    | maker-scaffold00050-augustus-gene-11.64-    | 0,0000  | 0,0000  | 0,9639 | (97)  |
| <b>PTGFR</b>  | Prostaglandin F2-alpha receptor       | uterine<br>receptivity /<br>prostaglandin | M    | maker-scaffold00011-augustus-gene-20.61-    | 3,0461  | -1,1214 | 0,0000 | (97)  |
| <b>PTGFRN</b> | Prostaglandin F2 receptor inhibitor   | uterine<br>receptivity /<br>prostaglandin | M    | maker-scaffold00079-snap-gene-5.50-         | -1,6674 | 0,0000  | 0,0000 | (97)  |
| <b>PTGIS</b>  | Prostaglandin synthase                | uterine<br>receptivity /<br>prostaglandin | M/ R | maker-scaffold00020-augustus-gene-1.27-     | -1,5772 | 0,0000  | 0,0000 | (97)  |
| <b>PTGS1</b>  | Prostaglandin G/H synthase 1          | uterine<br>receptivity /<br>prostaglandin | M    | maker-scaffold00022-augustus-gene-21.56-    | 0,0000  | -0,8775 | 0,0000 | (97)  |
| <b>PTGS2</b>  | Prostaglandin G/H synthase 2          | uterine<br>receptivity /<br>prostaglandin | M    | maker-scaffold00011-augustus-gene-46.41-    | -2,2945 | 0,0000  | 0,0000 | (97)  |

**SI Appendix Table S13: The genes with most expression changes during pipefish brood pouch development or pipefish pregnancy. Comparison was: developed pouch against undeveloped brood pouch tissue, early pregnant pouch tissue against undeveloped brood pouch tissue and late pregnant pouch tissue against undeveloped pouch tissue. Positive values indicate upregulation in undeveloped pouch tissues.**

| Gene name               | full gene name                                                         | process                 | function              | id                                                 | dev_vs_un dev | e- preg_vs_ undev | l- preg_vs_u ndev |
|-------------------------|------------------------------------------------------------------------|-------------------------|-----------------------|----------------------------------------------------|---------------|-------------------|-------------------|
| <b>CD74</b>             | H-2 class II histocompatibility antigen gamma chain                    | adaptive immune defence | antigen processing    | maker-scaffold00049-augustus-gene-8.11-            | -2,0334       | -2,78642          | -3,23619          |
| <b>FUT9</b>             | Alpha-(1,3)-fucosyltransferase 9                                       | adaptive immune defence | antigen processing    | maker-scaffold00010-snap-gene-27.42-               | -3,08337      | 0                 | 0                 |
| <b>IG KAPPA CHAIN V</b> | Ig kappa chain V-V region MOPC 21                                      | adaptive immune defence | antigen processing    | augustus_masked-scaffold00089-processed-gene-7.36- | 2,24574       | 2,36928           | 0                 |
| <b>IGLC1</b>            | Ig lambda-1 chain C regions                                            | adaptive immune defence | antigen processing    | augustus_masked-scaffold00089-processed-gene-7.39- | 0             | 2,90306           | 0                 |
| <b>IGMU</b>             | Ig mu chain C region membrane-bound form                               | adaptive immune defence | antigen processing    | genemark-scaffold00036-processed-gene-9.27-        | 3,02107       | 2,77106           | 3,54336           |
| <b>CLCF1</b>            | Cardiotrophin-like cytokine factor 1                                   | adaptive immune defence | B cell maturation     | maker-scaffold00013-snap-gene-49.40-               | -2,84877      | -3,22815          | -3,35656          |
| <b>FCRL5</b>            | Fc receptor-like protein 5                                             | adaptive immune defence | B cell maturation     | maker-scaffold00021-augustus-gene-18.49-           | 0             | 2,3117            | 2,52554           |
| <b>GPR97</b>            | Probable G-protein coupled receptor 97                                 | adaptive immune defence | B cell maturation     | maker-scaffold00036-augustus-gene-9.58-            | 1,71716       | 1,44545           | 2,23253           |
| <b>MFNG</b>             | Similar to mfng: Beta-1,3-N-acetylglucosaminyltransferase manic fringe | adaptive immune defence | B cell maturation     | maker-scaffold00091-augustus-gene-4.55-            | 1,84666       | 0                 | 2,04404           |
| <b>PRDM1</b>            | PR domain zinc finger protein 1                                        | adaptive immune defence | B cell maturation     | augustus_masked-scaffold00058-processed-gene-3.7-  | -3,25921      | 0                 | -2,1695           |
| <b>GIMAP4</b>           | GTPase IMAP family member 4                                            | adaptive immune defence | T / B cell maturation | snap_masked-scaffold00861-processed-gene-0.1-      | -2,74912      | 0                 | -1,90482          |
| <b>CHIA</b>             | Acidic mammalian chitinase                                             | adaptive immune defence | T cell maturation     | maker-scaffold00135-snap-gene-0.29-                | 3,30331       | 0                 | 0                 |
| <b>HAVCR1</b>           | Hepatitis A virus cellular receptor 1 homolog                          | adaptive immune defence | T cell maturation     | genemark-scaffold00008-processed-gene-22.3-        | 1,25439       | 1,9961            | 2,33745           |
| <b>NFATC4</b>           | Nuclear factor of activated T-cells, cytoplasmic 4                     | adaptive immune defence | T cell maturation     | maker-scaffold00002-augustus-gene-71.51-           | 1,04269       | 1,40499           | 2,23711           |
| <b>TNFRSF21</b>         | Tumor necrosis factor receptor superfamily member 21                   | adaptive immune defence | T cell maturation     | genemark-scaffold00135-processed-gene-1.14-        | -2,24893      | -1,23367          | -1,55011          |
| <b>IL17REL</b>          | Putative interleukin-17 receptor E-like                                | innate immune defence   | inflammation          | maker-scaffold00029-augustus-gene-28.42-           | -2,0652       | 0                 | -1,86166          |
| <b>NLRP6</b>            | NACHT, LRR and PYD domains-containing protein 6                        | innate immune defence   | inflammation          | maker-scaffold00064-snap-gene-8.117-               | 0             | 2,16319           | 2,88737           |
| <b>PLA2G4A</b>          | Cytosolic phospholipase A2                                             | innate immune defence   | inflammation          | maker-scaffold00011-augustus-gene-46.33-           | -2,80696      | 0                 | 0                 |
| <b>ADSSL1C</b>          | Adenylosuccinate synthetase isozyme 1 C                                | innate immune defence   | innate immune defence | maker-scaffold00044-augustus-gene-0.31-            | 3,80359       | 0                 | 0                 |
| <b>C6</b>               | Complement component C6                                                | innate immune defence   | innate immune defence | maker-scaffold00063-snap-gene-13.81-               | 0             | -2,30338          | 0                 |
| <b>EPX</b>              | Eosinophil peroxidase                                                  | innate immune defence   | innate immune defence | maker-scaffold00022-augustus-gene-39.76-           | -4,07819      | -1,52751          | -2,12184          |
| <b>GAL LECTIN</b>       | Galactose-specific lectin natterctin                                   | innate immune defence   | innate immune defence | maker-scaffold00399-augustus-gene-0.5-             | 3,41083       | 0                 | 0                 |

|                  |                                                              |                       |                            |                                                     |          |          |          |
|------------------|--------------------------------------------------------------|-----------------------|----------------------------|-----------------------------------------------------|----------|----------|----------|
| <i>GREM2</i>     | Gremlin-2                                                    | innate immune defence | innate immune defence      | genemark-scaffold00019-processed-gene-12.2-         | -3,02402 | 0        | -1,50035 |
| <i>JUND</i>      | Transcription factor jun-D                                   | innate immune defence | innate immune defence      | augustus_masked-scaffold00088-processed-gene-6.31-  | 0        | -2,47438 | -1,86318 |
| <i>MIF</i>       | Macrophage migration inhibitory factor                       | innate immune defence | innate immune defence      | maker-scaffold00219-augustus-gene-0.52-             | 2,13754  | 0        | 0        |
| <i>PLE3</i>      | Pleurocidin-like peptide WF3                                 | innate immune defence | innate immune defence      | maker-scaffold00046-augustus-gene-11.64-            | 4,52164  | 3,51947  | 2,43555  |
| <i>S100A13</i>   | Protein S100-A13                                             | innate immune defence | innate immune defence      | augustus_masked-scaffold00024-processed-gene-19.8-  | 4,06137  | 2,78926  | 1,93793  |
| <i>TNF</i>       | Tumor necrosis factor                                        | innate immune defence | innate immune defence      | maker-scaffold00058-augustus-gene-13.61-            | -2,89354 | 0        | -3,03681 |
| <i>TNFAIP8L1</i> | Tumor necrosis factor alpha-induced protein 8-like protein 1 | innate immune defence | innate immune defence      | augustus_masked-scaffold00037-processed-gene-23.37- | -2,12959 | 0        | -1,32696 |
| <i>RAPGEF3</i>   | Rap guanine nucleotide exchange factor 3                     | developmental process | angiogenesis               | maker-scaffold00001-augustus-gene-28.24-            | -2,07274 | 0        | 0        |
| <i>COL10A1</i>   | Collagen alpha-1(X) chain                                    | developmental process | bone development           | maker-scaffold00010-augustus-gene-27.38-            | -1,24964 | 0        | -2,5573  |
| <i>COL11A1</i>   | Collagen alpha-1(XI) chain                                   | developmental process | bone development           | genemark-scaffold00002-processed-gene-59.6-         | -3,32668 | -2,88118 | -3,34878 |
| <i>COL2A1</i>    | Collagen alpha-1(27) chain                                   | developmental process | bone development           | maker-scaffold00003-snap-gene-14.44-                | -2,31012 | -1,32123 | 0        |
| <i>KLHL41</i>    | Kelch-like protein 41                                        | developmental process | bone development           | maker-scaffold00066-augustus-gene-7.29-             | 2,06188  | 0        | 0        |
| <i>PDLIM3</i>    | PDZ and LIM domain protein 3                                 | developmental process | bone development           | maker-scaffold00034-augustus-gene-21.35-            | 4,66674  | 0        | 0        |
| <i>PDLIM7</i>    | PDZ and LIM domain protein 7                                 | developmental process | bone development           | maker-scaffold00027-snap-gene-28.44-                | 2,84204  | 0        | 0        |
| <i>SMAD9</i>     | Mothers against decapentaplegic homolog 9                    | developmental process | bone development           | maker-scaffold00008-augustus-gene-12.43-            | 3,08407  | 0        | 0        |
| <i>SOST</i>      | Sclerostin                                                   | developmental process | bone development           | maker-scaffold00015-augustus-gene-14.39-            | 0        | -2,08699 | 0        |
| <i>ANKRD1</i>    | Ankyrin repeat domain-containing protein 1                   | developmental process | cardiovascular development | maker-scaffold00145-augustus-gene-0.39-             | 0        | 3,6418   | 3,69306  |
| <i>HEY1</i>      | Hairy/enhancer-of-split related with YRPW motif protein 1    | developmental process | cardiovascular development | maker-scaffold00026-augustus-gene-31.86-            | 2,07784  | 1,43095  | 2,95744  |
| <i>SMYD1</i>     | Histone-lysine N-methyltransferase Smyd1                     | developmental process | cardiovascular development | maker-scaffold00054-augustus-gene-2.37-             | 3,12441  | 0        | 0        |
| <i>SMYD1</i>     | Histone-lysine N-methyltransferase SMYD1                     | developmental process | cardiovascular development | maker-scaffold00030-augustus-gene-13.62-            | 3,45469  | 1,28781  | 0        |
| <i>SMYD2B</i>    | N-lysine methyltransferase SMYD2-B                           | developmental process | cardiovascular development | augustus_masked-scaffold00077-processed-gene-3.32-  | 3,45326  | 0        | 0        |
| <i>BHMT</i>      | Betaine-homocysteine S-methyltransferase 1                   | developmental process | digestive system           | maker-scaffold00050-augustus-gene-5.58-             | 5,10341  | 0        | 0        |
| <i>BHMT</i>      | Betaine-homocysteine S-methyltransferase 1                   | developmental process | digestive system           | maker-scaffold00030-augustus-gene-10.33-            | 0        | -2,66341 | -3,19067 |
| <i>ALDH1A2</i>   | Retinal dehydrogenase 2                                      | developmental process | embryonal development      | maker-scaffold00005-augustus-gene-21.23-            | -3,17177 | -2,18398 | -2,42251 |
| <i>ARG 8</i>     | [Arg8]-vasotocin receptor                                    | developmental process | embryonal development      | augustus_masked-scaffold00017-processed-gene-0.2-   | 2,04437  | 0        | 0        |
| <i>CRABP2</i>    | Cellular retinoic acid-binding protein 2                     | developmental process | embryonal development      | maker-scaffold00101-snap-gene-6.79-                 | -1,96219 | -2,13417 | -1,92426 |

|                 |                                                                  |                       |                              |                                                     |          |          |          |
|-----------------|------------------------------------------------------------------|-----------------------|------------------------------|-----------------------------------------------------|----------|----------|----------|
| <i>HCEA</i>     | High choriolytic enzyme 1                                        | developmental process | embryonal development        | maker-scaffold00102-augustus-gene-1.33-             | 2,76964  | 0        | 0        |
| <i>KLF4</i>     | Krueppel-like factor 4                                           | developmental process | embryonal development        | snap_masked-scaffold00048-processed-gene-11.20-     | 0        | -2,00339 | -2,43069 |
| <i>KLF9</i>     | Krueppel-like factor 9                                           | developmental process | endometrium                  | maker-scaffold00027-augustus-gene-13.35-            | 0        | 2,33702  | 1,66913  |
| <i>DKK2</i>     | Dickkopf-related protein 2                                       | developmental process | endometrium/<br>progesterone | maker-scaffold00034-augustus-gene-5.34-             | 3,23958  | 1,28659  | 2,89159  |
| <i>CKM</i>      | Creatine kinase M-type                                           | developmental process | energy transduction          | maker-scaffold00074-snap-gene-2.47-                 | 4,43949  | 0        | 0        |
| <i>EPGN</i>     | Epigen                                                           | developmental process | EPGF response                | maker-scaffold00027-augustus-gene-2.67-             | 2,12098  | 0        | 1,29576  |
| <i>TGFA</i>     | Protransforming growth factor alpha (Fragment)                   | developmental process | EPGF response                | maker-scaffold00020-augustus-gene-9.47-             | -3,723   | 0        | 0        |
| <i>STX2</i>     | Syntaxin-2                                                       | developmental process | epithelial morphogenesis     | maker-scaffold00003-augustus-gene-38.26-            | -5,23102 | 0        | 0        |
| <i>TMEM79</i>   | Transmembrane protein 79                                         | developmental process | epithelial morphogenesis     | genemark-scaffold00167-processed-gene-0.4-          | -2,35773 | 0        | 0        |
| <i>ADAMTS1</i>  | A disintegrin and metalloproteinase with thrombospondin motifs 1 | developmental process | female fertilization         | maker-scaffold00039-snap-gene-14.31-                | -2,16821 | 0        | -3,05377 |
| <i>CUZD1</i>    | CUB and zona pellucida-like domain-containing protein 1          | developmental process | in utero development         | maker-scaffold00126-snap-gene-3.81-                 | -4,82703 | 0        | -2,87368 |
| <i>TPM1</i>     | Tropomyosin alpha-1 chain                                        | developmental process | in utero development         | maker-scaffold00017-snap-gene-28.74-                | 4,60837  | 0        | 0        |
| <i>TPM1</i>     | Tropomyosin alpha-1 chain                                        | developmental process | in utero development         | maker-scaffold00094-snap-gene-4.43-                 | 2,15154  | 0        | -1,51268 |
| <i>ALOX9</i>    | Arachidonate 8S-lipoxygenase                                     | developmental process | keratinization               | snap_masked-scaffold00034-processed-gene-6.31-      | 0        | -2,02663 | 0        |
| <i>CNFN-B</i>   | Cornifelin homolog B                                             | developmental process | keratinization               | maker-scaffold00074-augustus-gene-7.58-             | -2,53543 | -1,75197 | -1,8148  |
| <i>ENO3</i>     | Beta-enolase                                                     | developmental process | muscle development           | genemark-scaffold00038-processed-gene-4.5-          | 4,76423  | 0        | 0        |
| <i>JPH2</i>     | Junctophilin-2                                                   | developmental process | muscle development           | maker-scaffold00001-augustus-gene-92.25-            | 3,79542  | 0        | 0        |
| <i>MURC</i>     | Muscle-related coiled-coil protein                               | developmental process | muscle development           | augustus_masked-scaffold00065-processed-gene-8.5-   | 2,89224  | 0        | 0        |
| <i>SMTNL2</i>   | Smoothelin-like protein 2                                        | developmental process | muscle development           | genemark-scaffold00009-processed-gene-29.24-        | -2,19152 | 0        | 0        |
| <i>TNNI2</i>    | Troponin I, fast skeletal muscle                                 | developmental process | muscle development           | augustus_masked-scaffold00017-processed-gene-40.18- | 4,58781  | 0        | 0        |
| <i>DCHS1</i>    | Protocadherin-16                                                 | developmental process | neuronal development         | maker-scaffold00034-snap-gene-20.67-                | 2,07693  | 0        | 0        |
| <i>KCNN2</i>    | Small conductance calcium-activated potassium channel protein 2  | developmental process | neuronal development         | augustus_masked-scaffold00026-processed-gene-22.6-  | -3,62704 | 0        | 0        |
| <i>REG1B</i>    | Lithostathine-1-beta                                             | developmental process | neuronal development         | maker-scaffold00006-augustus-gene-61.44-            | -3,03354 | 0        | 0        |
| <i>SERPINI1</i> | Neuroserpin                                                      | developmental process | neuronal development         | maker-scaffold00116-augustus-gene-2.25-             | 0        | -4,97898 | 0        |
| <i>BGLAP</i>    | Osteocalcin                                                      | developmental process | organism tissue development  | maker-scaffold00004-augustus-gene-64.40-            | 0        | -3,04357 | -2,03638 |

|                |                                                                         |                       |                               |                                                    |          |              |          |
|----------------|-------------------------------------------------------------------------|-----------------------|-------------------------------|----------------------------------------------------|----------|--------------|----------|
| <i>ENAH</i>    | Protein enabled homolog                                                 | developmental process | organism tissue development   | maker-scaffold00061-augustus-gene-14.38-           | -2,6377  | 0            | 0        |
| <i>MSXC</i>    | Homeobox protein MSH-C                                                  | developmental process | organism tissue development   | maker-scaffold00023-augustus-gene-21.40-           | -4,62086 | 0            | -3,76791 |
| <i>MYL2</i>    | Myosin regulatory light chain 2, ventricular/cardiac muscle isoform     | developmental process | organism tissue development   | maker-scaffold00042-augustus-gene-7.44-            | 0        | 0            | -2,25899 |
| <i>SEMA3G</i>  | Semaphorin-3G                                                           | developmental process | organism tissue development   | maker-scaffold00001-augustus-gene-22.27-           | -2,3677  | 0            | 0        |
| <i>SOX7</i>    | Transcription factor Sox-7                                              | developmental process | organism tissue development   | maker-scaffold00077-snap-gene-5.92-                | -2,10665 | 0,96652<br>4 | -1,5667  |
| <i>TTC36</i>   | Tetratricopeptide repeat protein 36                                     | developmental process | organism tissue development   | maker-scaffold00021-augustus-gene-40.55-           | 1,7581   | 1,8393       | 2,57374  |
| <i>Znf513</i>  | Zinc finger protein 513                                                 | developmental process | organism tissue development   | maker-scaffold00079-augustus-gene-1.28-            | -2,03022 | 0            | 0        |
| <i>Adm2</i>    | Adrenomedullin                                                          | developmental process | placenta                      | maker-scaffold00029-augustus-gene-25.43-           | -3,09917 | -1,89595     | -2,5006  |
| <i>GPX4</i>    | Phospholipid hydroperoxide glutathione peroxidase 2C mitochondrial      | developmental process | placenta                      | maker-scaffold00011-augustus-gene-14.50-           | 2,26651  | 0            | 0        |
| <i>PLAC8</i>   | Placenta-specific gene 8 protein                                        | developmental process | placenta                      | maker-scaffold00050-augustus-gene-0.51-            | 0        | 1,80736      | 2,15204  |
| <i>NR4A3</i>   | Nuclear receptor subfamily 4 group A member 3                           | developmental process | sperm                         | maker-scaffold00081-augustus-gene-6.41-            | -3,42519 | 0            | 0        |
| <i>PLDXC1</i>  | Plexin domain-containing protein 1                                      | developmental process | spinal cord development       | maker-scaffold00015-augustus-gene-15.54-           | 2,37789  | 1,81104      | 3,0739   |
| <i>FABP6</i>   | Gastrotropin                                                            | developmental process | transport / apoptosis         | augustus_masked-scaffold00012-processed-gene-35.1- | -2,11932 | -2,36517     | -2,07423 |
| <i>CLDN5</i>   | Claudin-5                                                               | developmental process | transport / tight junctions   | augustus_masked-scaffold00027-processed-gene-3.10- | 0        | 0            | 2,13715  |
| <i>NOXO1</i>   | NADPH oxidase organizer 1                                               | developmental process | uterine receptivity           | maker-scaffold00051-augustus-gene-13.52-           | -2,52875 | 0            | 0        |
| <i>BNIP3</i>   | BCL2/adenovirus E1B 19 kDa protein-interacting protein 3 (Homo sapiens) | apoptosis             | apoptosis                     | maker-scaffold00043-augustus-gene-19.80-           | 1,61604  | 2,05762      | 2,50975  |
| <i>FHL2</i>    | Four and a half LIM domains protein 2                                   | apoptosis             | apoptosis                     | augustus_masked-scaffold00014-processed-gene-24.1- | 0        | -2,57293     | -2,67605 |
| <i>FHL2</i>    | Four and a half LIM domains protein 2                                   | apoptosis             | apoptosis                     | maker-scaffold00010-augustus-gene-27.35-           | 3,2775   | 0            | -2,21539 |
| <i>PIM3</i>    | Serine/threonine-protein kinase pim-3                                   | apoptosis             | apoptosis                     | maker-scaffold00029-augustus-gene-27.40-           | -1,34117 | -1,66014     | -2,3264  |
| <i>SIX1B</i>   | Homeobox protein six1b                                                  | apoptosis             | apoptosis                     | maker-scaffold00093-augustus-gene-3.28-            | 2,44617  | 0            | 0        |
| <i>SLC25A4</i> | ADP/ATP translocase 1                                                   | apoptosis             | apoptosis                     | augustus_masked-scaffold00045-processed-gene-3.42- | 3,00264  | 0            | 0        |
| <i>VOPP1</i>   | Vesicular, overexpressed in cancer, prosurvival protein 1               | apoptosis             | apoptosis                     | genemark-scaffold00018-processed-gene-19.12-       | 0        | 2,34141      | 0        |
| <i>CAMK1G</i>  | Calcium/calmodulin-dependent protein kinase type 1G                     | binding               | binding                       | maker-scaffold00001-augustus-gene-87.45-           | -2,74046 | 0            | 0        |
| <i>RCN3</i>    | Reticulocalbin-3                                                        | binding               | binding                       | augustus_masked-scaffold00047-processed-gene-6.11- | -1,9337  | -2,01913     | -2,18533 |
| <i>TMOD4</i>   | Tropomodulin-4                                                          | blood                 | blood                         | maker-scaffold00058-snap-gene-2.65-                | 3,85016  | 0            | 0        |
| <i>B3GNT7</i>  | N-acetyllactosaminide beta-13-N-acetylglucosaminyltransferase 7         | cell differentiation  | cell adhesion / proliferation | augustus_masked-scaffold00082-processed-gene-0.1-  | -2,82901 | 0            | -1,86002 |
| <i>BCR</i>     | Breakpoint cluster region protein                                       | cell differentiation  | cell adhesion / proliferation | genemark-scaffold00003-processed-gene-60.11-       | -2,824   | 0            | 0        |



|                 |                                                             |                      |                                    |                                                     |          |          |          |
|-----------------|-------------------------------------------------------------|----------------------|------------------------------------|-----------------------------------------------------|----------|----------|----------|
| <i>CDKN3</i>    | Cyclin-dependent kinase inhibitor 3                         | cell differentiation | cell adhesion / proliferation      | augustus_masked-scaffold00010-processed-gene-17.38- | -2,13229 | 0        | 0        |
| <i>FAM64A</i>   | Protein FAM64A                                              | cell differentiation | cell adhesion / proliferation      | maker-scaffold00008-snap-gene-21.86-                | 0        | -2,46495 | 0        |
| <i>IGFBP6</i>   | Insulin-like growth factor-binding protein 6                | cell differentiation | cell adhesion / proliferation      | maker-scaffold00001-augustus-gene-86.42-            | -3,59747 | 0        | 0        |
| <i>MKX</i>      | Homeobox protein Mohawk                                     | cell differentiation | cell adhesion / proliferation      | maker-scaffold00176-augustus-gene-1.62-             | -2,39185 | 0        | 0        |
| <i>MSLNL</i>    | Mesothelin-like protein                                     | cell differentiation | cell adhesion / proliferation      | maker-scaffold00034-augustus-gene-1.45-             | -2,06612 | 0        | -1,53551 |
| <i>NMRK2</i>    | Nicotinamide riboside kinase 2                              | cell differentiation | cell adhesion / proliferation      | maker-scaffold00037-augustus-gene-23.60-            | 0        | 0        | -2,45289 |
| <i>PRELP</i>    | Prolargin                                                   | cell differentiation | cell adhesion / proliferation      | maker-scaffold00042-snap-gene-17.52-                | -2,27678 | 0        | 0        |
| <i>SRC</i>      | Proto-oncogene tyrosine-protein kinase Src                  | cell differentiation | cell adhesion / proliferation      | maker-scaffold00025-snap-gene-8.40-                 | -2,70049 | 0        | 0        |
| <i>TUBA1A</i>   | Tubulin alpha-1A chain                                      | cell differentiation | cell adhesion / proliferation      | maker-scaffold00001-augustus-gene-30.30-            | 0        | -3,04922 | -2,754   |
| <i>TUBA1B</i>   | Tubulin alpha-1B chain                                      | cell differentiation | cell adhesion / proliferation      | augustus_masked-scaffold00001-processed-gene-30.4-  | 0        | -3,96079 | -3,65919 |
| <i>TUBA1C</i>   | Tubulin alpha-1C chain                                      | cell differentiation | cell adhesion / proliferation      | augustus_masked-scaffold00001-processed-gene-47.16- | 0        | -2,18976 | -1,79009 |
| <i>TSPAN1</i>   | Tetraspanin-1                                               | cell differentiation | conceptus growth / cell adhesion / | maker-scaffold00045-augustus-gene-11.30-            | 0        | 0        | -4,92762 |
| <i>APOBEC2</i>  | Probable C->U-editing enzyme APOBEC-2                       | gene expression      | epigenetic / gene expression       | maker-scaffold00162-augustus-gene-1.96-             | 3,0827   | 0        | 0        |
| <i>DXO</i>      | Decapping and exoribonuclease protein                       | gene expression      | epigenetic / gene expression       | maker-scaffold00004-snap-gene-3.83-                 | 0        | 2,88047  | 2,8908   |
| <i>DXO</i>      | Decapping and exoribonuclease protein                       | gene expression      | epigenetic / gene expression       | maker-scaffold00004-snap-gene-3.82-                 | 0        | 3,12669  | 2,37762  |
| <i>ERCC4</i>    | DNA repair endonuclease XPF                                 | gene expression      | epigenetic / gene expression       | maker-scaffold00051-snap-gene-11.27-                | -2,09033 | 0        | 0        |
| <i>KLHL31</i>   | Kelch-like protein 31                                       | gene expression      | epigenetic / gene expression       | maker-scaffold00024-augustus-gene-25.46-            | 3,11654  | 0        | 0        |
| <i>MEF2D</i>    | Myocyte-specific enhancer factor 2D homolog                 | gene expression      | epigenetic / gene expression       | maker-scaffold00058-snap-gene-5.52-                 | -1,79673 | 0        | -2,15293 |
| <i>PABPC4</i>   | Polyadenylate-binding protein 4                             | gene expression      | epigenetic / gene expression       | maker-scaffold00044-snap-gene-14.43-                | 2,07771  | 0        | 0        |
| <i>TRIM55</i>   | Tripartite motif-containing protein 55                      | gene expression      | epigenetic / gene expression       | maker-scaffold00002-augustus-gene-43.71-            | 2,90674  | 1,32087  | 0        |
| <i>APOA1</i>    | Apolipoprotein A-I                                          | hormone              | steroid / hormone                  | genemark-scaffold00009-processed-gene-42.17-        | 0        | -4,64929 | -5,42389 |
| <i>CALCOCO1</i> | Calcium-binding and coiled-coil domain-containing protein 1 | hormone              | steroid / hormone                  | maker-scaffold00067-snap-gene-9.48-                 | 0        | 2,41804  | 0        |
| <i>HSD11B1</i>  | Hydroxysteroid 11-beta-dehydrogenase 1-like protein         | hormone              | steroid / hormone                  | maker-scaffold00011-augustus-gene-7.29-             | -2,45103 | 0        | 0        |
| <i>PTGFR</i>    | Prostaglandin F2-alpha receptor                             | hormone              | steroid / hormone                  | maker-scaffold00011-augustus-gene-20.61-            | 3,04614  | -1,12135 | 0        |

|                 |                                                                            |                   |                               |                                                    |          |          |           |
|-----------------|----------------------------------------------------------------------------|-------------------|-------------------------------|----------------------------------------------------|----------|----------|-----------|
| <b>PTGS2</b>    | Prostaglandin G/H synthase 2                                               | hormone           | steroid / hormone             | maker-scaffold00011-augustus-gene-46.41-           | -2,29452 | 0        | 0         |
| <b>FAM69A</b>   | Protein FAM69A                                                             | membrane          | membrane                      | maker-scaffold00002-snap-gene-19.50-               | -2,20669 | 0        | 0         |
| <b>GANZ</b>     | Guanine nucleotide-binding protein G(z) subunit alpha                      | membrane          | membrane                      | maker-scaffold00022-augustus-gene-38.32-           | 0        | -2,17574 | 0         |
| <b>GPR155</b>   | Integral membrane protein GPR155                                           | membrane          | membrane                      | maker-scaffold00007-augustus-gene-25.36-           | -2,89823 | 0        | -1,59949  |
| <b>SGCG</b>     | Gamma-sarcoglycan                                                          | membrane          | membrane                      | augustus_masked-scaffold00009-processed-gene-3.1-  | 2,535    | 0        | 0         |
| <b>TMEM238</b>  | Transmembrane protein 238                                                  | membrane          | membrane                      | maker-scaffold00015-augustus-gene-42.47-           | -2,20134 | 0        | 0         |
| <b>TMEM38A</b>  | Trimeric intracellular cation channel type A                               | membrane          | membrane                      | maker-scaffold00011-augustus-gene-41.50-           | 3,95238  | 0        | 0         |
| <b>A1AT</b>     | Alpha-1-antitrypsin homolog                                                | metabolic process | metabolic process             | maker-scaffold00075-augustus-gene-9.25-            | 0        | -4,61005 | -3,91652  |
| <b>ALD</b>      | Fructose-bisphosphate aldolase A                                           | metabolic process | metabolic process             | maker-scaffold00015-augustus-gene-17.64-           | 4,6383   | 0        | 0         |
| <b>CYP24A1</b>  | 1,25-dihydroxyvitamin D(3) 24-hydroxylase, mitochondrial                   | metabolic process | metabolic process             | maker-scaffold00025-augustus-gene-8.38-            | 2,22375  | 0        | 1,70951   |
| <b>FAM213A</b>  | Redox-regulatory protein FAM213A                                           | metabolic process | metabolic process             | maker-scaffold00015-augustus-gene-15.56-           | -2,16579 | 0,89920  | -0,867901 |
| <b>HGD</b>      | Homogentisate 1,2-dioxygenase                                              | metabolic process | metabolic process             | maker-scaffold00018-augustus-gene-23.52-           | 1,36034  | 0        | 2,10152   |
| <b>HOMER2</b>   | Homer protein homolog 2                                                    | metabolic process | metabolic process             | maker-scaffold00005-augustus-gene-45.56-           | -2,2788  | 0        | 0         |
| <b>LPL</b>      | Lipoprotein lipase                                                         | metabolic process | metabolic process             | maker-scaffold00011-augustus-gene-3.53-            | 1,25086  | 1,87975  | 2,22114   |
| <b>PCK2</b>     | Phosphoenolpyruvate carboxykinase                                          | metabolic process | metabolic process             | genemark-scaffold00018-processed-gene-38.2-        | -2,88181 | -1,89538 | -2,63708  |
| <b>PFKM</b>     | ATP-dependent 6-phosphofructokinase, muscle type                           | metabolic process | metabolic process             | maker-scaffold00031-augustus-gene-2.23-            | 0        | 2,98092  | 2,8252    |
| <b>PGM1</b>     | Phosphoglucomutase-1                                                       | metabolic process | metabolic process             | maker-scaffold00011-snap-gene-50.32-               | 2,83088  | 0        | 0         |
| <b>TP1B</b>     | Triosephosphate isomerase B                                                | metabolic process | metabolic process             | genemark-scaffold00035-processed-gene-2.14-        | 2,6974   | 0        | 0         |
| <b>FABP1</b>    | Fatty acid-binding protein%2C liver-type                                   | metabolic process | metabolic process / transport | maker-scaffold00030-augustus-gene-13.52-           | 0        | -2,05204 | -3,14184  |
| <b>SH3BGR</b>   | SH3 domain-binding glutamic acid-rich protein                              | mitochondrion     | mitochondrion                 | maker-scaffold00009-augustus-gene-2.28-            | 5,26001  | 0        | 0         |
| <b>MARCH7</b>   | E3 ubiquitin-protein ligase MARCH7                                         | protein           | protein modification          | augustus_masked-scaffold00005-processed-gene-49.1- | -2,10917 | 0        | 0         |
| <b>ANKRD28</b>  | Serine/threonine-protein phosphatase 6 regulatory ankyrin repeat subunit A | protein           | protein modification          | maker-scaffold00028-snap-gene-28.47-               | -2,38827 | 0        | 0         |
| <b>GFPT2</b>    | Glutamine--fructose-6-phosphate aminotransferase [isomerizing] 2           | protein           | protein modification          | maker-scaffold00049-augustus-gene-11.41-           | -2,26512 | 0        | 0         |
| <b>KLHL38</b>   | Kelch-like protein 38                                                      | protein           | protein modification          | maker-scaffold00073-augustus-gene-1.58-            | 2,7606   | 3,77597  | 3,18103   |
| <b>MYOZ2</b>    | Myozenin-2                                                                 | protein           | protein modification          | maker-scaffold00038-augustus-gene-14.29-           | 3,19367  | 1,49046  | 1,63145   |
| <b>RNF144AA</b> | Probable E3 ubiquitin-protein ligase RNF144A-A                             | protein           | protein modification          | maker-scaffold00010-snap-gene-47.34-               | 0        | 1,63057  | 2,02624   |
| <b>FAM177A1</b> | Protein FAM177A1                                                           | protein           | unknown                       | maker-scaffold00075-snap-gene-7.13-                | -2,33533 | 0        | 0         |
| <b>ACTA1</b>    | Actin, alpha skeletal muscle                                               | sensory reaction  | muscle contraction            | augustus_masked-scaffold00005-processed-gene-1.34- | 4,1379   | 0        | 0         |
| <b>ACTC</b>     | Actin, alpha cardiac                                                       | sensory reaction  | muscle contraction            | maker-scaffold00010-augustus-gene-52.35-           | 4,02399  | 0        | 0         |
| <b>ACTC</b>     | Actin, alpha cardiac                                                       | sensory reaction  | muscle contraction            | maker-scaffold00107-augustus-gene-2.53-            | 4,24573  | 3,87088  | 0         |
| <b>ACTC1</b>    | Actin, alpha cardiac muscle 1                                              | sensory reaction  | muscle contraction            | augustus_masked-scaffold00010-processed-gene-29.2- | 2,69478  | 1,94864  | 0         |
| <b>CASQ1</b>    | Calsequestrin-1 (                                                          | sensory reaction  | muscle contraction            | maker-scaffold00038-snap-gene-2.65-                | 4,26665  | 0        | 0         |

|                 |                                                                              |                   |                    |                                                    |          |          |          |
|-----------------|------------------------------------------------------------------------------|-------------------|--------------------|----------------------------------------------------|----------|----------|----------|
| <i>CASQ2</i>    | Calsequestrin-2                                                              | sensory reaction  | muscle contraction | genemark-scaffold00007-processed-gene-59.17-       | 1,43488  | 2,55707  | 1,09615  |
| <i>M-PROT</i>   | M-protein, striated muscle                                                   | sensory reaction  | muscle contraction | maker-scaffold00125-snap-gene-3.146-               | 4,84647  | 0        | 0        |
| <i>MYLPF</i>    | Myosin regulatory light chain, skeletal muscle isoform type 2                | sensory reaction  | muscle contraction | maker-scaffold00047-augustus-gene-13.99-           | 4,41798  | 0        | 0        |
| <i>MYLPF</i>    | Myosin regulatory light chain 2, skeletal muscle isoform                     | sensory reaction  | muscle contraction | maker-scaffold00015-augustus-gene-36.73-           | 2,09656  | 2,65305  | 0        |
| <i>MYOHCH</i>   | Myosin heavy chain, fast skeletal muscle                                     | sensory reaction  | muscle contraction | maker-scaffold00020-snap-gene-8.51-                | 0        | -1,47376 | -2,2916  |
| <i>MYOHCH</i>   | Myosin heavy chain, fast skeletal muscle                                     | sensory reaction  | muscle contraction | maker-scaffold00004-augustus-gene-31.43-           | 0        | 0        | -3,25145 |
| <i>MYOHCH</i>   | Myosin heavy chain, fast skeletal muscle                                     | sensory reaction  | muscle contraction | genemark-scaffold00020-processed-gene-8.10-        | 3,89969  | 0        | 0        |
| <i>MYOLCHC</i>  | Myosin light chain 1, cardiac muscle                                         | sensory reaction  | muscle contraction | augustus_masked-scaffold00027-processed-gene-1.14- | 4,50642  | 2,90846  | 0        |
| <i>MYOLCHS</i>  | Myosin light chain 3, skeletal muscle isoform                                | sensory reaction  | muscle contraction | maker-scaffold00070-augustus-gene-6.38-            | 4,59611  | 0        | 0        |
| <i>MYOM2</i>    | Myomesin-2                                                                   | sensory reaction  | muscle contraction | genemark-scaffold00034-processed-gene-26.31-       | 3,07832  | 0        | 0        |
| <i>MYOM2</i>    | MYOM2: Myomesin-2                                                            | sensory reaction  | muscle contraction | genemark-scaffold00002-processed-gene-18.10-       | 3,56919  | 0        | 0        |
| <i>MYOM2</i>    | MYOM2: Myomesin-2                                                            | sensory reaction  | muscle contraction | maker-scaffold00005-augustus-gene-7.28-            | 3,96532  | 0        | 0        |
| <i>PVALBB2</i>  | Parvalbumin beta-2                                                           | sensory reaction  | muscle contraction | augustus_masked-scaffold00004-processed-gene-9.39- | 6,09956  | 0        | 0        |
| <i>TNNC</i>     | Troponin C, skeletal muscle                                                  | sensory reaction  | muscle contraction | augustus_masked-scaffold00001-processed-gene-23.9- | 4,20496  | 0        | 0        |
| <i>TRDN</i>     | Triadin                                                                      | sensory reaction  | muscle contraction | maker-scaffold00077-augustus-gene-1.98-            | 3,57133  | 1,6103   | 0        |
| <i>TTN</i>      | Titin                                                                        | sensory reaction  | muscle contraction | snap_masked-scaffold00014-processed-gene-1.9-      | 2,85435  | 0        | 0        |
| <i>FAM134P</i>  | Protein FAM134B                                                              | sensory reaction  | sensory reaction   | maker-scaffold00002-augustus-gene-66.64-           | 0        | 2,6039   | 0        |
| <i>FAM222A</i>  | Protein FAM222A                                                              | sensory reaction  | sensory reaction   | maker-scaffold00022-augustus-gene-29.43-           | -2,50465 | 0        | 0        |
| <i>S100P</i>    | Protein S100-P                                                               | sensory reaction  | sensory reaction   | maker-scaffold00155-augustus-gene-2.81-            | 0        | 0        | -2,77289 |
| <i>TMEM150A</i> | Transmembrane protein 150A                                                   | sensory reaction  | sensory reaction   | genemark-scaffold00043-processed-gene-13.31-       | -3,02026 | 0        | -1,94394 |
| <i>VEGP</i>     | Lipocalin                                                                    | sensory reaction  | sensory reaction   | maker-scaffold00018-augustus-gene-27.23-           | 2,55689  | 0        | 0        |
| <i>GMPR</i>     | GMP reductase 1                                                              | sensory reaction  | stress regulation  | snap_masked-scaffold00024-processed-gene-32.60-    | 2,27393  | 0        | 0        |
| <i>CIRL</i>     | Latrophilin Cirl                                                             | signaling         | signaling          | maker-scaffold00023-augustus-gene-32.77-           | 0        | -1,8218  | -2,3406  |
| <i>DHRS7CA</i>  | Dehydrogenase/reductase SDR family member 7C-A                               | signaling         | signaling          | maker-scaffold00015-augustus-gene-45.34-           | 4,1668   | 0        | 0        |
| <i>FOS</i>      | Proto-oncogene c-Fos                                                         | signaling         | signaling          | genemark-scaffold00077-processed-gene-7.22-        | 0        | -3,07587 | -2,47111 |
| <i>LGR6</i>     | Leucine-rich repeat-containing G-protein coupled receptor 6                  | signaling         | signaling          | maker-scaffold00070-augustus-gene-11.61-           | 0        | -3,31032 | 0        |
| <i>RGS3</i>     | Regulator of G-protein signaling 3                                           | signaling         | signaling          | genemark-scaffold00048-processed-gene-4.2-         | -2,37802 | 0        | 0        |
| <i>CILP</i>     | Cartilage intermediate layer protein 1                                       | stress regulation | insulin pathway    | maker-scaffold00121-augustus-gene-4.34-            | 0        | 0        | -5,25234 |
| <i>PK2</i>      | Pyruvate dehydrogenase (acetyl-transferring) kinase isozyme 2, mitochondrial | stress regulation | insulin pathway    | maker-scaffold00004-augustus-gene-49.23-           | 2,31714  | 1,1115   | 1,37197  |
| <i>SIK2</i>     | Similar to SIK2: Serine/threonine-protein kinase SIK2 (Gallus gallus)        | stress regulation | insulin pathway    | maker-scaffold00007-augustus-gene-64.40-           | 0        | 0        | -2,55981 |
| <i>ALAS2</i>    | 5-aminolevulinic synthase, erythroid-specific, mitochondrial                 | stress regulation | stress regulation  | augustus_masked-scaffold00031-processed-gene-16.9- | -1,54571 | 0        | -2,01443 |
| <i>ARRDC3</i>   | Arrestin domain-containing protein 3                                         | stress regulation | stress regulation  | maker-scaffold00050-augustus-gene-14.86-           | 0        | 1,74748  | 2,48304  |
| <i>CAHZ</i>     | Similar to cahz: Carbonic anhydrase (Danio rerio)                            | stress regulation | stress regulation  | maker-scaffold00002-augustus-gene-83.39-           | -1,39043 | 0        | -2,12137 |
| <i>CILP</i>     | Cartilage intermediate layer protein 1                                       | stress regulation | stress regulation  | maker-scaffold00121-snap-gene-3.41-                | 0        | 0        | -7,15441 |
| <i>HSPA8</i>    | Heat shock cognate 71 kDa protein                                            | stress regulation | stress regulation  | maker-scaffold00026-snap-gene-22.59-               | 2,93941  | 0        | 0        |

|                 |                                                        |                   |                   |                                              |          |          |          |
|-----------------|--------------------------------------------------------|-------------------|-------------------|----------------------------------------------|----------|----------|----------|
| <i>HSPB1</i>    | Heat shock protein beta-1                              | stress regulation | stress regulation | maker-scaffold00008-augustus-gene-41.38-     | 2,42169  | 0        | 0        |
| <i>LS-12</i>    | Type-4 ice-structuring protein LS-12                   | stress regulation | stress regulation | maker-scaffold00024-augustus-gene-17.72-     | 0        | -4,58777 | -5,00146 |
| <i>MAP3K7CL</i> | MAP3K7 C-terminal-like protein                         | stress regulation | stress regulation | maker-scaffold00008-snap-gene-20.49-         | 2,19517  | 0        | 0        |
| <i>METRNL</i>   | Meteorin-like protein                                  | stress regulation | stress regulation | genemark-scaffold00053-processed-gene-11.20- | -2,12656 | 0        | 0        |
| <i>MYLK</i>     | Myosin light chain kinase, smooth muscle (Fragment)    | stress regulation | stress regulation | maker-scaffold00051-snap-gene-7.73-          | 2,27832  | 0        | 0        |
| <i>NEOVE</i>    | Neoverrucotoxin subunit alpha ´                        | stress regulation | stress regulation | genemark-scaffold00047-processed-gene-2.8-   | -4,09709 | -3,76871 | -3,92026 |
| <i>PIP4K2A</i>  | Phosphatidylinositol 5-phosphate 4-kinase type-2 alpha | stress regulation | stress regulation | genemark-scaffold00018-processed-gene-26.16- | -2,04972 | 0        | 0        |
| <i>PLCL1</i>    | Inactive phospholipase C-like protein 1                | stress regulation | stress regulation | genemark-scaffold00014-processed-gene-50.6-  | -2,17933 | 0        | 0        |
| <i>FRRS1</i>    | Putative ferric-chelate reductase 1                    | transport         | transport         | genemark-scaffold00002-processed-gene-68.36- | -2,38096 | 0        | -1,91422 |
| <i>NAGLT1</i>   | Sodium-dependent glucose transporter 1                 | transport         | transport         | maker-scaffold00135-augustus-gene-3.51-      | -2,36216 | 0        | 0        |
| <i>SLC43A2</i>  | Large neutral amino acids transporter small subunit 4  | transport         | transport         | maker-scaffold00008-augustus-gene-2.26-      | 3,48693  | 1,4322   | 0        |
| <i>SLC4A1</i>   | Band 3 anion exchange protein                          | transport         | transport         | maker-scaffold00047-snap-gene-15.64-         | 0        | 0        | -2,65229 |
| <i>SRL</i>      | Sarcalumenin                                           | transport         | transport         | maker-scaffold00141-snap-gene-3.61-          | 3,58937  | 0        | 0        |
| <i>TF</i>       | Serotransferrin                                        | transport         | transport         | maker-scaffold00096-augustus-gene-3.52-      | 0        | -2,55122 | -1,76032 |
| <i>TOMM40</i>   | Mitochondrial import receptor subunit TOM40 homolog    | transport         | transport         | maker-scaffold00028-snap-gene-31.109-        | 0        | -4,39196 | -3,10469 |
| <i>unknown</i>  | Protein of unknown function                            | unknown           | unknown           | maker-scaffold00003-augustus-gene-27.38      | 0        | 0        | -2,57625 |
| <i>unknown</i>  | Protein of unknown function                            | unknown           | unknown           | maker-scaffold00015-snap-gene-31.46-         | -3,97258 | 0        | 0        |
| <i>unknown</i>  | Protein of unknown function                            | unknown           | unknown           | maker-scaffold00042-augustus-gene-16.56-     | -2,44314 | 0        | 0        |
| <i>unknown</i>  | Protein of unknown function                            | unknown           | unknown           | maker-scaffold00037-augustus-gene-8.38-      | -2,11303 | 0        | -1,71089 |
| <i>unknown</i>  | Protein of unknown function                            | unknown           | unknown           | maker-scaffold00039-augustus-gene-6.26-      | -1,86397 | -3,2515  | 0        |
| <i>unknown</i>  | Protein of unknown function                            | unknown           | unknown           | maker-scaffold00024-augustus-gene-35.150-    | 0        | -4,75471 | -4,97039 |
| <i>unknown</i>  | Protein of unknown function                            | unknown           | unknown           | maker-scaffold00101-augustus-gene-0.61-      | 0        | -4,44566 | -5,02445 |
| <i>unknown</i>  | Protein of unknown function                            | unknown           | unknown           | maker-scaffold00101-augustus-gene-0.59-      | 0        | -4,25239 | -3,90736 |
| <i>unknown</i>  | Protein of unknown function                            | unknown           | unknown           | genemark-scaffold00002-processed-gene-7.20-  | 0        | 0        | -2,751   |
| <i>unknown</i>  | Protein of unknown function                            | unknown           | unknown           | genemark-scaffold00032-processed-gene-26.8-  | 0        | 0        | 2,09359  |
| <i>unknown</i>  | Protein of unknown function                            | unknown           | unknown           | maker-scaffold00049-augustus-gene-11.39-     | 0        | 2,62214  | 3,62875  |
| <i>unknown</i>  | Protein of unknown function                            | unknown           | unknown           | maker-scaffold00006-augustus-gene-49.46-     | 1,28609  | 1,12395  | 2,02365  |
| <i>unknown</i>  | Protein of unknown function                            | unknown           | unknown           | maker-scaffold00047-snap-gene-2.41-          | 2,39669  | 0        | 0        |
| <i>UPF0501</i>  | Similar to UPF0501 protein KIAA1430 homolog            | unknown           | unknown           | maker-scaffold00045-augustus-gene-3.61-      | 2,39658  | 0        | 0        |

### 7.5. Gene expression during pregnancy, comparison *Syngnathus typhle* vs. *Syngnathus scovelli*

To validate our findings with another independent study, we compared the differentially expressed genes during pregnancy of *S. scovelli*(3) and *S. typhle* (undeveloped pouch vs. early pregnant). We identified 141 genes that are significantly up- or down regulated during male pregnancy in both species (SI Appendix Table S14).

The direction of expression differences in differentially expressed genes correlated between *S. typhle* and *S. scovelli* ( $R^2 = 0.767$ ), implying that the direction of up- or downregulation during pregnancy was mostly consistent in both pipefish species. In particular, this was the case for the four genes with the most extreme upregulation during pregnancy (*MYOC*, *HCEA*, *LS-12*, *APOA1*) and for the two genes that showed the most massive downregulation during pregnancy (*STX2* and *MSXC*).

Several immune genes were overlapping in their expression change in the two species.

**CEBPB** has in mammals an important role in the early embryogenesis due to its antiproliferative effect on T-cells by repressing MHC expression and facilitating the onset of the anti-inflammatory Th2 response upon the identified upregulation, which is supported by its upregulation in both species during pregnancy. Similar to *SOCS3*, which is also upregulated both in *S. typhle* and in *S. scovelli*, it regulates TH2 immune responses including the maintenance of allergic responses over *IL6*. In line with this, **IL6R** was downregulated in both species. *PTX3* (upregulated in *S. typhle*, downregulated in *S. scovelli*) has a dual function in the innate immune system and in female fertility, similar to *ID2* that is responsible for the differentiation of leukocytes and also plays a role in embryonal development). The complement system seems activated in both species during pregnancy, as indicated by the upregulation of *C6* and *CFD* (alternative pathway). In line with the predictions for a successful pregnancy, inflammation responses were downregulated in both species (*PLA2G4A*, *STAP2*). Also adaptive immune responses including B-cell maturation were mostly downregulated when they were not simultaneously involved in embryonal development (**PRDM1**, *CLCF1*, however, the latter was upregulated during pregnancy in *S. typhle*).

On the side of the innate immune system *CXCL9*, a cytokine driving the activation of diverse immune cells is downregulated in *S. typhle* but upregulated in *S. scovelli*. *TLR2-1*,

responsible for cytokine secretion and inflammatory response, was upregulated in both species.

*APP2* that was upregulated in *S. typhle* but downregulated in *S. scovelli*, is involved in the antimicrobial humoral immune responses. *RAC1* involved in phagocytosis was downregulated during pregnancy in both species. Other innate immune genes were *MAP3K5*, which was slightly upregulated in both species, while *ADAMTS1* was upregulated in *S. typhle* but downregulated in *S. scovelli*.

From all genes that were not involved in immune responses, we only discuss those where at least once species had a fold change difference of >2.

Most genes that were differentially expressed both in *S. typhle* and *S. scovelli* during male pregnancy are involved in embryonal development. As such, *STX2* (involved in epithelia morphogenesis), *MSXC* (in humans responsible for the development of the inner ear), *KCNN2* & *ISL3* (neuronal synapses) and *BCR* and *TFGB3* (various functions in embryogenesis) are consistently downregulated during pregnancy in both species.

The opposite pattern could be found for genes involved in osteoblast differentiation and bone formation (*SOST*, *SMAD9*, *MYOC*), egg hatching (*HCEA*, *APOA1*), they were highly upregulated during pregnancy in both species. For some embryonal development genes, however, we found a downregulation in *Syngnathus typhle* and an upregulation in *S. scovelli* (*DKK2*) or the opposite pattern (*MFAP2*, *ALDH1A2*).

*HSD11B1* involved in steroid pathway was downregulated in both species assessed. *IGFBP6*, known from mammalian pregnancy to inhibit labours, is downregulated in *S. typhle* but upregulated in *S. scovelli*. The stress gene *LS-12* was highly upregulated in both species during pregnancy. Several other genes with functions in cell adhesion and transport were also differentially expressed in both species. The full list of differentially expressed genes during pregnancy of both *S. typhle* and *S. scovelli* can be found in SI Appendix Table S13. This suggests that in both species immune and embryonal developmental genes seem to play major roles during male pregnancy and that differentially expressed genes considerably overlap.

**SI Appendix Table S14: Genes with expression changes both during pregnancy of *S. typhle* (1) and *S. scovelli* (SSC)**

| <b>name</b>      | <b>ID STY</b>                                      | <b><i>S. typhle</i> log2FC (undev_epreg)</b> | <b>Gene_ID SSC</b> | <b><i>S. scovelli</i> log2FC</b> | <b>category</b>       | <b>function</b>            |
|------------------|----------------------------------------------------|----------------------------------------------|--------------------|----------------------------------|-----------------------|----------------------------|
| <i>STX2</i>      | maker-scaffold00003-augustus-gene-38.26            | -3,80149                                     | SSCG00000004506    | -2,585547457                     | embryonal development | epithelia morphogenesis    |
| <i>MSXC</i>      | maker-scaffold00023-augustus-gene-21.40            | -3,67628                                     | SSCG00000014649    | -3,343167499                     | embryonal development | ear morphogenesis          |
| <i>KCNN2</i>     | augustus_masked-scaffold00026-processed-gene-22.6  | -3,02652                                     | SSCG00000008660    | -1,066440089                     | embryonal development | synaptic transmission      |
| <i>CAMK1G</i>    | maker-scaffold00001-augustus-gene-87.45            | -2,84637                                     | SSCG00000006897    | -1,248528878                     | other                 | ATP binding                |
| <i>unknown</i>   | maker-scaffold00042-augustus-gene-16.56            | -2,50322                                     | SSCG00000000884    | -1,024166971                     | unknown               | unknown                    |
| <i>TMEM150A</i>  | genemark-scaffold00043-processed-gene-13.31        | -2,41694                                     | SSCG00000000528    | -1,158732973                     | metabolism            | catabolism fasting induced |
| <i>PLA2G4A</i>   | maker-scaffold00011-augustus-gene-46.33            | -2,36275                                     | SSCG000000011782   | -0,728505619                     | immune                | inflammation               |
| <i>PRDM1</i>     | augustus_masked-scaffold00058-processed-gene-3.7   | -2,32956                                     | SSCG00000002979    | -1,981114972                     | immune                | B cell maturation          |
| <i>Mar 07</i>    | augustus_masked-scaffold00005-processed-gene-49.1  | -2,31625                                     | SSCG00000013551    | -1,328816247                     | protein               | protein ubiquitination     |
| <i>unknown</i>   | maker-scaffold00037-augustus-gene-8.38             | -2,2855                                      | SSCG00000005233    | -1,056617348                     | unknown               | unknown                    |
| <i>HSD11B1L</i>  | maker-scaffold00011-augustus-gene-7.29             | -2,20912                                     | SSCG00000008093    | -1,831251973                     | hormone               | steroid pathway            |
| <i>NAGL1</i>     | maker-scaffold00135-augustus-gene-3.51             | -2,19711                                     | SSCG00000000079    | -0,931791631                     | transport             | sodium-ion transport       |
| <i>MSLINL</i>    | maker-scaffold00034-augustus-gene-1.45             | -2,05823                                     | SSCG00000005045    | -1,612759244                     | cell adhesion         | cell adhesion              |
| <i>BCR</i>       | genemark-scaffold00003-processed-gene-60.11        | -2,0315                                      | SSCG00000002754    | -1,241047337                     | embryonal development | embryonal development      |
| <i>FAM69A</i>    | maker-scaffold00002-snap-gene-19.50                | -2,01196                                     | SSCG00000010175    | -1,509702695                     | other                 | membrane component         |
| <i>KLHDC1</i>    | maker-scaffold00015-augustus-gene-15.62            | -1,98957                                     | SSCG00000019315    | -0,834554107                     | other                 | cytoplasm                  |
| <i>TTC36</i>     | maker-scaffold00021-augustus-gene-40.55            | -1,8393                                      | SSCG00000018122    | 1,246676237                      | embryonal development | embryonal development      |
| <i>MSXC</i>      | maker-scaffold00008-augustus-gene-9.39             | -1,83683                                     | SSCG00000001114    | -1,135429194                     | embryonal development | embryonal development      |
| <i>A33</i>       | maker-scaffold00017-augustus-gene-38.36            | -1,81953                                     | SSCG00000019560    | -0,650342488                     | unknown               | unkonwn                    |
| <i>ISLR2</i>     | augustus_masked-scaffold00017-processed-gene-34.5  | -1,76514                                     | SSCG00000015892    | -2,733441317                     | embryonal development | neural development         |
| <i>ZNF513</i>    | maker-scaffold00079-augustus-gene-1.28             | -1,72221                                     | SSCG00000003113    | -1,004574642                     | embryonal development | retina development         |
| <i>MKX</i>       | maker-scaffold00176-augustus-gene-1.62             | -1,67741                                     | SSCG00000008274    | -1,34205988                      | spermatogenesis       | male gonad development     |
| <i>ENAH</i>      | maker-scaffold00061-augustus-gene-14.38            | -1,62648                                     | SSCG00000000062    | -0,828343468                     | embryonal development | filipodia formation        |
| <i>PRKCD</i>     | genemark-scaffold00062-processed-gene-2.8          | -1,56253                                     | SSCG00000001318    | -1,537627077                     | apoptosis             | apoptosis                  |
| <i>FGD5</i>      | maker-scaffold00062-augustus-gene-2.47             | -1,54367                                     | SSCG00000001316    | -1,963972199                     | cell structure        | cell shape organisation    |
| <i>TGFB3</i>     | maker-scaffold00010-augustus-gene-54.34            | -1,53164                                     | SSCG00000015695    | -2,197119068                     | embryonal development | embryogenesis              |
| <i>DGKZ</i>      | maker-scaffold00001-augustus-gene-64.58            | -1,52896                                     | SSCG00000001663    | -0,499073096                     | blood                 | blood coagulation          |
| <i>IST1</i>      | maker-scaffold00102-augustus-gene-2.32             | -1,52575                                     | SSCG00000005977    | -0,596301624                     | cell proliferation    | cell cycle/ cell division  |
| <i>TNFAIP8L1</i> | augustus_masked-scaffold00037-processed-gene-23.37 | -1,51986                                     | SSCG00000015792    | -0,665722321                     | embryonal development | TOR signaling              |
| <i>RORB</i>      | maker-scaffold00011-snap-gene-36.34                | -1,51397                                     | SSCG00000016888    | -1,731705396                     | embryonal development | osteoblast differentiation |
| <i>TTC39A</i>    | maker-scaffold00004-augustus-gene-71.33            | -1,50919                                     | SSCG00000008919    | -0,514041341                     | unknown               | unknown                    |
| <i>CHCHD6</i>    | maker-scaffold00001-snap-gene-8.27                 | -1,45905                                     | SSCG00000010556    | -1,368986749                     | unknown               | unknown                    |

|                  |                                                |          |                 |              |                       |                                                                   |
|------------------|------------------------------------------------|----------|-----------------|--------------|-----------------------|-------------------------------------------------------------------|
| <i>KIAA0922</i>  | genemark-scaffold00034-processed-gene-24.13    | -1,45329 | SSCG00000016784 | -0,842141574 | other                 | membrane component                                                |
| <i>ATP2A3</i>    | maker-scaffold00008-snap-gene-40.40            | -1,43516 | SSCG00000002189 | -0,532445586 | transport             | calcium ion transport                                             |
| <i>GRAMD3</i>    | maker-scaffold00002-snap-gene-55.34            | -1,43461 | SSCG00000010479 | 0,560329335  | other                 | microtubule                                                       |
| <i>HEY1</i>      | maker-scaffold00026-augustus-gene-31.86        | -1,43095 | SSCG00000010880 | 1,484072479  | embryonal development | heart development                                                 |
| <i>RDX</i>       | snap_masked-scaffold00014-processed-gene-20.32 | -1,41713 | SSCG00000014669 | 0,473036595  | cell structure        | regulation of cell structure                                      |
| <i>FM05</i>      | maker-scaffold00011-snap-gene-22.66            | -1,41074 | SSCG00000015973 | 0,633769074  | other                 | NADP binding                                                      |
| <i>EHF</i>       | maker-scaffold00006-augustus-gene-22.22        | -1,36355 | SSCG00000011332 | -0,941628315 | cell proliferation    | cell proliferation                                                |
| <i>RAP1GAP2</i>  | maker-scaffold00009-augustus-gene-38.22        | -1,34857 | SSCG00000009559 | -0,690259582 | embryonal development | neuronal development                                              |
| <i>LRIG1</i>     | maker-scaffold00062-augustus-gene-5.23         | -1,32577 | SSCG00000001327 | -1,164889806 | embryonal development | embryonal development                                             |
| <i>BTBD7</i>     | maker-scaffold00093-snap-gene-5.58             | -1,30115 | SSCG00000015617 | -0,675918772 | embryonal development | embryonal development                                             |
| <i>DKK2</i>      | maker-scaffold00034-augustus-gene-5.34         | -1,28659 | SSCG00000006209 | 2,706555135  | embryonal development | embryonal development                                             |
| <i>FURIN</i>     | maker-scaffold00005-augustus-gene-17.32        | -1,2747  | SSCG00000013367 | -0,831488069 | other                 | membrane component                                                |
| <i>FAM213A</i>   | maker-scaffold00015-augustus-gene-15.56        | -1,26659 | SSCG00000019326 | -1,054638155 | stress                | redox regulation                                                  |
| <i>IGFBP6</i>    | maker-scaffold00001-augustus-gene-86.42        | -1,2641  | SSCG00000006889 | 2,071881685  | in utero development  | uterine function regulation, and inhibited labors                 |
| <i>DNMT3b</i>    | maker-scaffold00120-snap-gene-2.53             | -1,25611 | SSCG00000009469 | -0,940052021 | unknown               | unknown                                                           |
| <i>CHST11</i>    | maker-scaffold00025-snap-gene-30.44            | -1,25114 | SSCG00000013736 | -1,30119718  | embryonal development | embryonal development                                             |
| <i>ZBTB11</i>    | genemark-scaffold00007-processed-gene-60.14    | -1,22536 | SSCG00000010753 | -0,616092414 | transcription         | transcription                                                     |
| <i>SPAG1</i>     | maker-scaffold00041-snap-gene-12.26            | -1,2218  | SSCG00000017172 | -0,506689918 | fertilization         | fertilization                                                     |
| <i>ALDH2</i>     | maker-scaffold00041-augustus-gene-16.41        | -1,21399 | SSCG00000017205 | -0,946325591 | hormone               | response to steroid hormone                                       |
| <i>RAB11FIP2</i> | maker-scaffold00069-augustus-gene-9.30         | -1,20465 | SSCG00000004610 | -0,756704951 | insulin               | insulin pathway                                                   |
| <i>ADM2</i>      | maker-scaffold00029-augustus-gene-25.43        | -1,20322 | SSCG00000007876 | -1,230938333 | in utero development  | trophoblast invasion and migration, angiogenesis (cardiovascular) |
| <i>PITPNA</i>    | maker-scaffold00009-snap-gene-28.27            | -1,12423 | SSCG00000014483 | -0,589303601 | transport             | transport                                                         |
| <i>MAP4K3</i>    | genemark-scaffold00056-processed-gene-9.15     | -1,11779 | SSCG00000007960 | -0,49944484  | stress                | JUN pathway; stress                                               |
| <i>NSMAF</i>     | genemark-scaffold00018-processed-gene-11.5     | -1,10047 | SSCG00000014091 | -1,21647643  | apoptosis             | apoptosis                                                         |
| <i>GMDS</i>      | maker-scaffold00051-snap-gene-0.45             | -1,10005 | SSCG00000005931 | -0,879010674 | transport             | iron-ion transport                                                |
| <i>CXCL9</i>     | maker-scaffold00023-augustus-gene-21.37        | -1,08909 | SSCG00000014646 | 0,89697591   | immune                | cytokine; immune response; activation of immune cells             |
| <i>HSH2D</i>     | snap_masked-scaffold00011-processed-gene-3.23  | -1,0804  | SSCG00000008128 | -0,971320031 | signaling             | tyrosin kinase signaling                                          |
| <i>NPD21</i>     | maker-scaffold00022-augustus-gene-18.53        | -1,0798  | SSCG00000006332 | -0,583638368 | cell proliferation    | neural cell proliferation                                         |
| <i>DAG1</i>      | maker-scaffold00001-augustus-gene-94.19        | -1,07588 | SSCG00000012110 | -0,941749525 | cell proliferation    | cell survival                                                     |
| <i>RAC1</i>      | maker-scaffold00015-augustus-gene-6.53         | -1,0643  | SSCG00000013113 | -0,449310942 | immune                | immune; phagocytosis                                              |
| <i>DDX56</i>     | maker-scaffold00050-augustus-gene-14.91        | -1,04373 | SSCG00000019137 | 0,482487778  | other                 | rRNA processing                                                   |
| <i>THBS2</i>     | maker-scaffold00019-snap-gene-33.37            | -1,03978 | SSCG00000017775 | -1,301736445 | embryonal development | angiogenesis                                                      |
| <i>OPTN</i>      | maker-scaffold00029-augustus-gene-25.39        | -1,03675 | SSCG00000009097 | -0,626096359 | apoptosis             | TNF-alpha; apoptosis                                              |
| <i>GSR</i>       | maker-scaffold00012-snap-gene-9.46             | -1,02414 | SSCG00000020143 | -0,771293376 | stress                | cell redox homeostasis                                            |
| <i>SCGN</i>      | maker-scaffold00026-augustus-gene-13.29        | -1,01562 | SSCG00000012784 | -1,139278181 | transport             | calcium ion binding                                               |
| <i>unknown</i>   | maker-scaffold00035-augustus-gene-8.46         | -1,01289 | SSCG00000018949 | 0,785698511  | other                 |                                                                   |



|                     |                                                   |           |                  |              |                       |                                                                                                                    |
|---------------------|---------------------------------------------------|-----------|------------------|--------------|-----------------------|--------------------------------------------------------------------------------------------------------------------|
| <i>ZNF503</i>       | maker-scaffold00080-augustus-gene-1.23            | -1,01219  | SSCG00000018251  | -1,196293656 | embryonal development | embryonal development                                                                                              |
| <i>B4GALNT1</i>     | maker-scaffold00057-augustus-gene-2.61            | -1,00791  | SSCG00000009983  | 0,646198776  | spermatogenesis       | spermatogenesis                                                                                                    |
| <i>RAB15</i>        | maker-scaffold00010-augustus-gene-40.35           | -0,995149 | SSCG00000001701  | -0,585142975 | cell proliferation    | protein transport                                                                                                  |
| <i>GRINA</i>        | maker-scaffold00026-snap-gene-30.57               | -0,967896 | SSCG00000010850  | -0,482856252 | apoptosis             | apoptosis                                                                                                          |
| <i>STAP2</i>        | maker-scaffold00011-augustus-gene-13.41           | -0,9584   | SSCG000000015086 | -1,6695311   | immune                | inflammation; STAT 3 activity                                                                                      |
| <i>unknown</i>      | maker-scaffold00005-augustus-gene-59.31           | -0,951653 | SSCG00000002767  | -0,835423    | other                 | unknown                                                                                                            |
| <i>MAL2</i>         | maker-scaffold00026-snap-gene-12.18               | -0,948849 | SSCG00000012789  | -0,642548547 | other                 | membrane component                                                                                                 |
| <i>NOB1</i>         | maker-scaffold00036-augustus-gene-0.61            | -0,948241 | SSCG00000018086  | 0,58421508   | other                 | rRNA processing, visual perception                                                                                 |
| <i>ZDHHC9</i>       | maker-scaffold00013-snap-gene-21.27               | -0,947763 | SSCG00000005638  | -0,59721255  | other                 | membrane component                                                                                                 |
| <i>TSG101</i>       | maker-scaffold00006-augustus-gene-25.21           | -0,93006  | SSCG00000011340  | -0,480638358 | cell proliferation    | cell cycle/ cell division                                                                                          |
| <i>PTK7</i>         | maker-scaffold00019-snap-gene-19.41               | -0,905429 | SSCG00000004758  | -1,034793559 | embryonal development | Wnt signaling pathway                                                                                              |
| <b><i>IL6R</i></b>  | maker-scaffold00081-augustus-gene-3.57            | -0,865669 | SSCG00000010964  | -0,454217454 | immune                | receptor for IL6; cytokine receptor; immune                                                                        |
| <i>ETV6</i>         | maker-scaffold00097-augustus-gene-5.67            | -0,852208 | SSCG00000006150  | 0,588871674  | embryonal development | transcriptional repressor, hematopoiesis, neurogenesis, vitellogenesis                                             |
| <i>FAM57A</i>       | maker-scaffold00009-augustus-gene-30.35           | -0,840976 | SSCG00000014478  | -0,742397283 | unknown               | unknown                                                                                                            |
| <i>ATP7A</i>        | maker-scaffold00012-snap-gene-28.61               | -0,840934 | SSCG00000000923  | -0,59260857  | transport             | copper transport                                                                                                   |
| <i>CAP1</i>         | augustus_masked-scaffold00024-processed-gene-0.11 | -0,823277 | SSCG00000018678  | -0,642434836 | embryonal development | embryonal development                                                                                              |
| <i>ANKRD13A</i>     | maker-scaffold00003-augustus-gene-11.40           | -0,8216   | SSCG00000005515  | -0,919749535 | other                 | plasma membrane                                                                                                    |
| <i>AP3M2</i>        | maker-scaffold00003-augustus-gene-55.25           | -0,806796 | SSCG00000002711  | -0,594759908 | transport             | intracellular protein transport                                                                                    |
| <i>GNPTAB</i>       | maker-scaffold00064-snap-gene-6.84                | -0,788319 | SSCG00000015315  | 4,431434331  | transport             | lysosomal enzyme transport                                                                                         |
| <i>ARID5B</i>       | maker-scaffold00022-augustus-gene-0.45            | 0,87321   | SSCG00000007995  | 0,985657959  | embryonal development | liver development                                                                                                  |
| <b><i>PTGS1</i></b> | maker-scaffold00022-augustus-gene-21.56           | 0,877511  | SSCG00000006297  | 0,604683999  | hormone               | prostaglandin synthesis, inflammatory response, blood pressure, cell proliferation                                 |
| <i>SMARCD2</i>      | maker-scaffold00015-augustus-gene-35.59           | 0,88465   | SSCG00000013629  | -0,476408745 | transcription         | transcription regulation                                                                                           |
| <i>CERS4</i>        | genemark-scaffold00037-processed-gene-21.1        | 0,890948  | SSCG00000015805  | 0,858871956  | other                 | sphingolipid production                                                                                            |
| <i>FAM213A</i>      | maker-scaffold00015-augustus-gene-15.56           | 0,899201  | SSCG00000019326  | -1,054638155 | metabolism            | metabolic process                                                                                                  |
| <i>MAP3K5</i>       | genemark-scaffold00073-processed-gene-2.8         | 0,913159  | SSCG00000020032  | 0,709011763  | immune                | innate immune: MAP kinase signaling                                                                                |
| <i>VIT</i>          | maker-scaffold00019-augustus-gene-26.35           | 0,968969  | SSCG00000017805  | -1,212819013 | cell adhesion         | promotes matrix assembly and cell adhesiveness - positive regulation of cell-substrate adhesion                    |
| <i>ABI3BP</i>       | maker-scaffold00001-augustus-gene-72.38           | 0,969748  | SSCG00000017701  | -0,773286116 | blood                 | collagen binding, heparin binding                                                                                  |
| <b><i>PGR</i></b>   | genemark-scaffold00009-processed-gene-58.22       | 1,00038   | SSCG00000018116  | 1,319065897  | hormone               | steroid hormones and receptors involved in eukaryotic gene expression. Cellular proliferation and differentiation. |
| <i>LIMK2</i>        | maker-scaffold00003-augustus-gene-13.19           | 1,00501   | SSCG00000007434  | 0,842158691  | spermatogenesis       | Spermatogenesis                                                                                                    |
| <i>DLX4A</i>        | maker-scaffold00047-augustus-gene-1.30            | 1,03152   | SSCG00000008604  | 0,62294535   | embryonal development | embryonal development                                                                                              |

|                 |                                                   |         |                 |              |                                     |                                                                                                                          |
|-----------------|---------------------------------------------------|---------|-----------------|--------------|-------------------------------------|--------------------------------------------------------------------------------------------------------------------------|
| <i>VEGFAA</i>   | maker-scaffold00060-snap-gene-4.40                | 1,03408 | SSCG00000009790 | 0,826983399  | embryonal development               | angiogenesis; cell proliferation, apoptosis inhibition                                                                   |
| <i>FSTL3</i>    | maker-scaffold00011-augustus-gene-6.39            | 1,03595 | SSCG00000008107 | 1,051651377  | immune; osteoblast; spermatogenesis | inhibits BMP2 induced cellular signaling, osteoblast differentiation, male gonad development, spermatogenesis            |
| <i>ADD3</i>     | maker-scaffold00033-augustus-gene-0.17            | 1,04518 | SSCG00000003279 | -0,641435421 | cell adhesion                       | transmembrane protein, binds to calmodulin                                                                               |
| <i>PODN</i>     | genemark-scaffold00071-processed-gene-7.16        | 1,05692 | SSCG00000007802 | 2,052556461  | cell proliferation                  | cell proliferation                                                                                                       |
| <i>MARCKSL1</i> | maker-scaffold00010-augustus-gene-10.30           | 1,05906 | SSCG00000014536 | 0,682994875  | cell proliferation                  | positive regulation of cell proliferation                                                                                |
| <i>GLUL</i>     | augustus_masked-scaffold00002-processed-gene-23.8 | 1,07209 | SSCG00000010218 | 0,618107399  | embryonal development               | embryonal development                                                                                                    |
| <i>SOX9-B</i>   | genemark-scaffold00004-processed-gene-23.8        | 1,07967 | SSCG00000020573 | 1,153511858  | embryonal development               | embryonal development: ear and neurones                                                                                  |
| <i>TLR-1</i>    | maker-scaffold00058-augustus-gene-3.48            | 1,10002 | SSCG00000002988 | 1,183578784  | immune                              | innate immune response to microbial agents; regulation of cytokine secretion                                             |
| <i>CEBPB</i>    | snap_masked-scaffold00001-processed-gene-82.40    | 1,12416 | SSCG00000003201 | 1,08772866   | immune                              | immune and inflammatory responses; early embryogenesis; antiproliferative effect on T-cells by repressing MHC expression |
| <i>APP</i>      | maker-scaffold00039-augustus-gene-13.22           | 1,14625 | SSCG00000008907 | -0,581190911 | immune                              | antimicrobial humal immune response; innate immune response                                                              |
| <i>C6</i>       | maker-scaffold00063-snap-gene-13.81               | 1,17047 | SSCG00000016399 | 2,866862829  | immune                              | complement system membrane attack complex                                                                                |
| <i>HEYL</i>     | maker-scaffold00024-augustus-gene-11.44           | 1,19457 | SSCG00000011738 | 1,466891982  | embryonal development               | embryonal development ; Notch signaling                                                                                  |
| <i>STK32B</i>   | maker-scaffold00008-augustus-gene-3.41            | 1,2481  | SSCG00000007324 | -1,561114243 | signaling                           | ATP binding, intracellular signaling                                                                                     |
| <i>MFAP2</i>    | maker-scaffold00020-augustus-gene-4.63            | 1,25488 | SSCG00000000663 | -2,017390244 | embryonal development               | embryo eye morphogenesis                                                                                                 |
| <i>RGCC</i>     | maker-scaffold00014-augustus-gene-47.21           | 1,25563 | SSCG00000019682 | 0,871544096  | cell proliferation                  | cell cycle                                                                                                               |
| <i>CFD</i>      | genemark-scaffold00124-processed-gene-1.4         | 1,28116 | SSCG00000003998 | 0,901691371  | immune: complement                  | complement system: alternative pathway                                                                                   |
| <i>EPGN</i>     | maker-scaffold00027-augustus-gene-2.67            | 1,29584 | SSCG00000003546 | 1,766589097  | embryonal development               | EPGF response                                                                                                            |
| <i>FAM53B</i>   | maker-scaffold00069-augustus-gene-2.35            | 1,30305 | SSCG00000014325 | 1,013183687  | unknown                             | unknown                                                                                                                  |
| <i>FSTL3</i>    | maker-scaffold00011-augustus-gene-6.39            | 1,34566 | SSCG00000008107 | 1,051651377  | immune                              | immune; osteoblast; spermatogenesis                                                                                      |
| <i>JUNB</i>     | augustus_masked-scaffold00053-processed-gene-9.6  | 1,41208 | SSCG00000008537 | 1,594511043  | hormone                             | hormone                                                                                                                  |
| <i>SOCS3</i>    | maker-scaffold00004-augustus-gene-37.31           | 1,42842 | SSCG00000014355 | 1,803038185  | immune                              | immune defence; regulates onset and maintenance of allergic responses mediated by T-helper                               |

|                |                                                    |         |                  |              |                       |                                                                                                                                      |
|----------------|----------------------------------------------------|---------|------------------|--------------|-----------------------|--------------------------------------------------------------------------------------------------------------------------------------|
|                |                                                    |         |                  |              |                       | type 2 cells. regulates IL-6 signaling in vivo. : immune system                                                                      |
| <i>ADAMTS</i>  | maker-scaffold00059-augustus-gene-2.37             | 1,43043 | SSCG00000011493  | -1,017376544 | immune                | metalloproteinase                                                                                                                    |
| <i>NET1</i>    | maker-scaffold00029-augustus-gene-26.43            | 1,4505  | SSCG00000007875  | 1,54851508   | apoptosis             | apoptosis                                                                                                                            |
| <i>PTX3</i>    | maker-scaffold00116-augustus-gene-2.31             | 1,48777 | SSCG00000005081  | -1,214684839 | immune                | innate immune system, resistance to pathogens, inflammatory reactions, clearance of self-components and female fertility             |
| <i>TF</i>      | maker-scaffold00096-augustus-gene-3.52             | 1,55518 | SSCG00000001812  | -0,904967042 | transport             | transport- iron                                                                                                                      |
| <i>ID2</i>     | maker-scaffold00010-augustus-gene-46.30            | 1,61915 | SSCG000000015149 | 1,381549857  | immune                | immune response (leukocyt differentiation, NK cell) & embryonal development                                                          |
| <i>CA4</i>     | maker-scaffold00008-augustus-gene-25.70            | 1,61922 | SSCG000000012480 | 1,084144244  | transport             | CO2 and Sodium transport                                                                                                             |
| <i>FOSL2</i>   | genemark-scaffold00010-processed-gene-6.6          | 1,67003 | SSCG000000014514 | 1,654752711  | bone                  | osteoblast survival and size. Activates transcription of LIF and CEBPB together with jun                                             |
| <i>HEPHL1</i>  | maker-scaffold00008-snap-gene-2.32                 | 1,6723  | SSCG00000007326  | 1,644280235  | transport             | copper transport                                                                                                                     |
| <i>SEMASA</i>  | maker-scaffold00018-snap-gene-25.33                | 1,69227 | SSCG00000001240  | -0,916270573 | apoptosis             | increases cell proliferation and migration and inhibits apoptosis, which potentially promotes angiogenesis                           |
| <i>JUNB</i>    | augustus_masked-scaffold00004-processed-gene-67.32 | 1,69312 | SSCG000000020360 | 1,341703143  | hormone               | estrogen pathway, uterine response to estrogen, transcription, gene expression                                                       |
| <i>CXCL12</i>  | maker-scaffold00023-augustus-gene-21.38            | 1,69662 | SSCG000000014643 | 1,005308194  | unknown               | unknown                                                                                                                              |
| <i>SOCS3</i>   | maker-scaffold00004-augustus-gene-37.31            | 1,70321 | SSCG000000014355 | 1,803038185  | immune                | immune                                                                                                                               |
| <i>COL18A1</i> | snap_masked-scaffold00014-processed-gene-8.33      | 1,70373 | SSCG000000009070 | 0,849437876  | embryonal development | angiogenesis, visual perception                                                                                                      |
| <i>ID2</i>     | maker-scaffold00010-augustus-gene-46.30            | 1,7072  | SSCG000000015149 | 1,381549857  | immune                | immune                                                                                                                               |
| <i>JUNB</i>    | augustus_masked-scaffold00053-processed-gene-9.6   | 1,71243 | SSCG000000008537 | 1,594511043  | hormone               | estrogen pathway, uterine response to estrogen, transcription, gene expression                                                       |
| <i>ID1</i>     | maker-scaffold00062-augustus-gene-8.24             | 1,7301  | SSCG000000007259 | 1,088895166  | embryonal development | transcriptional regulator; angiogenesis; clock                                                                                       |
| <i>JUNB</i>    | augustus_masked-scaffold00004-processed-gene-67.32 | 1,75392 | SSCG000000020360 | 1,341703143  | hormone               | hormone                                                                                                                              |
| <i>MYOC</i>    | maker-scaffold00011-snap-gene-21.51                | 1,75578 | SSCG000000015977 | 3,629778253  | bone                  | bone formation, promotes osteoblast differentiation                                                                                  |
| <i>INHBB</i>   | maker-scaffold00020-augustus-gene-28.20            | 1,75731 | SSCG000000014188 | -0,654325889 | hormone               | activates follitropin secretion; gonadal hormone secretion; germ cell development and maturation, embryonal development, bone growth |
| <i>ADM2</i>    | maker-scaffold00029-augustus-gene-25.43            | 1,89595 | SSCG000000007876 | -1,230938333 | pregnancy             | pregnancy                                                                                                                            |
| <i>HEPHL1</i>  | maker-scaffold00008-snap-gene-2.32                 | 2,00396 | SSCG00000007326  | 1,644280235  | transport             | transport                                                                                                                            |
| <i>SOST</i>    | maker-scaffold00015-augustus-gene-14.39            | 2,08699 | SSCG000000019330 | 1,403085855  | bone                  | bone formation                                                                                                                       |

|                |                                                  |         |                 |              |                       |                                                      |
|----------------|--------------------------------------------------|---------|-----------------|--------------|-----------------------|------------------------------------------------------|
| <i>SOST</i>    | maker-scaffold00015-augustus-gene-14.39          | 2,16699 | SSCG00000019330 | 1,403085855  | embryonal development | bone formation                                       |
| <i>ALDH1A2</i> | maker-scaffold00005-augustus-gene-21.23          | 2,18398 | SSCG00000013402 | -1,947742459 | embryonal development | embryonal development                                |
| <i>C6</i>      | maker-scaffold00063-snap-gene-13.81              | 2,30338 | SSCG00000016399 | 2,866862829  | immune                | complement system                                    |
| <i>RASD2</i>   | augustus_masked-scaffold00045-processed-gene-6.2 | 2,52683 | SSCG00000014747 | 2,460472039  | locomotion            | locomotion                                           |
| <i>TF</i>      | maker-scaffold00096-augustus-gene-3.52           | 2,55122 | SSCG00000001812 | -0,904967042 | transport             | iron ion transport                                   |
| <i>TLR2-1</i>  | maker-scaffold00058-augustus-gene-3.48           | 3,03175 | SSCG00000002988 | 1,183578784  | immune                | immune                                               |
| <i>CLCF1</i>   | maker-scaffold00013-snap-gene-49.40              | 3,22815 | SSCG00000005729 | -1,110167551 | immune                | adaptive immune defence, B cell maturation           |
| <i>PRR33</i>   | maker-scaffold00017-snap-gene-40.105             | 3,27326 | SSCG00000019602 | 1,038278575  | unknown               | unknown                                              |
| <i>SMAD9</i>   | maker-scaffold00008-augustus-gene-12.43          | 3,30442 | SSCG00000002651 | 0,7253261    | embryonal development | osteoblast differentiation                           |
| <i>MYOC</i>    | maker-scaffold00011-snap-gene-21.51              | 3,49787 | SSCG00000015977 | 3,629778253  | embryonal development | bone formation                                       |
| <i>HCEA</i>    | maker-scaffold00102-augustus-gene-1.33           | 3,53311 | SSCG00000005974 | 4,395061631  | egg hatching          | egg hatching                                         |
| <i>LS-12</i>   | maker-scaffold00024-augustus-gene-17.72          | 4,58777 | SSCG00000018317 | 2,610053533  | stress                | stress regulation                                    |
| <i>APOA1</i>   | genemark-scaffold00009-processed-gene-42.17      | 4,64929 | SSCG00000009542 | 5,314326365  | hormone               | adrenal gland development, steroid / hormone pathway |
| <i>LS-12</i>   | maker-scaffold00024-augustus-gene-17.72          | 5,36141 | SSCG00000018317 | 2,610053533  | stress                | stress                                               |
| <i>APOA1</i>   | genemark-scaffold00009-processed-gene-42.17      | 5,97501 | SSCG00000009542 | 5,314326365  | embryonal development | adrenal gland development                            |

## 8. SI Appendix Data Set 1

Alignment files in FASTA format.

See SI Appendix data files at figshare: [doi: 10.6084/m9.figshare.11499360](https://doi.org/10.6084/m9.figshare.11499360)

1hemoglobin\_alpha.fas  
2hemoglobin\_beta.fas  
3AID\_clean.fas  
4AID\_clean.fas  
5A\_CD4clean.fas  
5CD4\_clean\_conserved\_block\_no\_frag.fas  
6CD4\_clean\_conserved\_block.fas  
7CIITA\_raw.fas  
8CIITA\_temp\_section\_with\_ensemble.fas  
9CIITA\_temp\_section.fas  
10CD74\_clean.fas  
11CD74\_exon\_loss\_determination\_clean.fas  
12AIRE\_clean\_long.fas  
13AIRE\_exon\_overview.fas  
14AIRE\_redone\_clean\_no\_Sp180\_Sp663\_NerOph.fas  
15AIRE\_redone\_clean\_with\_Hip\_syn\_frag.fas  
16AIRE\_redone\_clean\_with\_Hipcomfrag.fas  
17AIRE\_redone\_clean.fas  
18AIRE\_redone\_with\_ensembl.fas  
19AIRE\_redone.fas  
20B2M\_clean\_trimmed\_nucl.fas  
21B2M\_cean.fas  
22B2M\_raw.fas  
23CD8\_clean\_with\_ensembl.fas  
24CD8\_clean.fas  
25CD8\_clean\_compactsection.fas  
26MHCI\_exon2.fas  
27MHCI\_exon3.fas  
28MHCI\_exon4.fas  
29MHCII\_beta\_complete.fas  
30MHCII\_beta\_1-86aa.fas  
31MHCII\_beta\_91-184aa.fas  
32RAG1.fas  
33RAG2.fas  
34TAPs\_clean.fas

## 9. SI Appendix Data Set 2

Details on the selected taxon set for phylogenetic analyses. Taxonomy follows ref<sup>31</sup> unless indicated otherwise.

### Holostei (Infraclass)

Monophyly support: BS 100% (ref(27))

Possible sister groups: Teleostei (Infraclass)(27).

Diagnostic characters: 13 synapomorphies(171).

Earliest record: †*Acentrophorus varians* Kirkby, 1862 (ref(172)).

Formation: Raisby Formation at Fulwell Hill (Sunderland, UK)(173).

Age: Wuchiapingian (259.8-254.1 Ma).

Used as calibration: Yes.

Sampled species: *Lepisosteus oculatus*.

### Teleostei (Infraclass)

Monophyly support: BS 100% (27, 174)

Possible sister groups: Holostei (Infraclass)(27).

Diagnostic characters: Eleven synapomorphies(175).

Earliest record: †*Malingichthys* spp. Tintori et al., 2015.

Formation: Zhuganpo Member of the Falang Formation at Xingyi City (Guizhou Province, China).

Age: Middle Late Ladinian (239.5-237.0 Ma)(176).

Used as calibration: Yes.

Sampled species: 70 species.

### Elopocephalai (Megacohort)

Monophyly support: BS 100% (ref(27)).

Possible sister groups: Osteoglossomorpha (Supercohort), Clupeocephala (Supercohort)(27).

Diagnostic characters: Five synapomorphies of Elopomorpha, the only cohort of megacohort Elopocephalai(175)

Earliest record: †*Anaethalion zaporum* Arratia, 2000(177).

Formation: Rögling Formation at Schamhaupten (Eichstätt, Germany)(177).

Age: Latest Kimmeridgian (154.7-152.1 Ma)(177).

Used as calibration: Yes.

Sampled species: *Anguilla anguilla*, *Anguilla japonica*.

### Osteoglossomorpha (Supercohort)

Monophyly support: BS 99%(27).

Possible sister groups: Elopocephalai (Megacohort), Clupeocephala (Supercohort)(27).

Diagnostic characters: Four synapomorphies(175).

Earliest record: †*Lycoptera* spp. (Sauvage, 1880).

Formation: Lower Yixian Formation at Jianshangou (China)(178).

Age: 128.4-121.0 Ma(179, 180).

Used as calibration: Yes.

Sampled species: *Scleropages formosus*.

### Clupeocephala (Supercohort)

Monophyly support: BS 100% ref(27).

Possible sister groups: Elopocephalai (Megacohort), Osteoglossomorpha (Supercohort)(27).

Diagnostic characters: Ten synapomorphies(175, 181).

Earliest record: †*Leptolepides sprattiformis* Blainville, 1818 (ref(182)).

Formation: Lithographic limestone of Cerin (Ain, France).

Age: Kimmeridgian (157.3-152.1 Ma)(183).

Used as calibration: Yes.

Sampled species: 67 species.

### **Otomorpha (Cohort)**

Monophyly support: BS 100% (ref(27)).

Possible sister groups: Euteleosteomorpha (Cohort)(27).

Diagnostic characters: Five synapomorphies(175).

Earliest record: †*Tischlingerichthys vlohli* Arratia, 1997. Otomorpha combine subcohorts Clupei, Alepocephali, and Ostariophysii(27). No stem-group fossils are known for Otomorpha and both Clupei and Alepocephali appear in the fossil record later than Ostariophysii(177, 184). Thus, the earliest fossil record of Otomorpha is †*Tischlingerichthys vlohli*, the oldest member of Ostariophysii(177).

Formation: Mörnsheim Formation at Mühlheim (Bavaria, Germany)(177).

Age: 152.1-150.9 Ma(177).

Used as calibration: Yes.

Sampled species: *Clupea harengus*, *Danio rerio*, *Astyanax mexicanus*, *Electrophorus electricus*.

### **Cypriniphysae (Superorder)**

Monophyly support: BS 100% (ref(27)).

Possible sister groups: Characiphysae *sensu*(177). (Superorder).

Diagnostic characters: Nine synapomorphies(175).

Earliest record: cf. Cypriniformes indet(185).

Formation: Tremp Formation at Els Nerets (Spain)(185).

Age: C31r magnetochron (71.5-68.3 Ma)(186).

Used as calibration: Yes.

Sampled species: *Danio rerio*.

### **Characiphysae (Superorder) *sensu* Betancur-R. et al. 2013**

Monophyly support: BS 100% (ref(27)).

Possible sister groups: Cypriniphysae (Superorder)(27).

Diagnostic characters: 13 synapomorphies(175).

Earliest record: †*Santanichthys diasii* (Silva Santos, 1958). According to(27), Characiphysae combine the three orders Gymnotiformes, Characiformes, and Siluriformes(27). No stem-group fossils are known for Characiphysae and both Gymnotiformes and Siluriformes appear in the fossil record later than Characiformes. Thus, the earliest fossil record of Characiphysae is †*Santanichthys diasii*, the oldest member of Characiformes(187-189). Note that in the more recent classification of ref(27), Characiphysae include just the single order Characiformes; however, the monophyly of the clade combining Characiformes, Gymnotiformes, and Siluriformes is not debated.

Formation: Romualdo Member of the Santana Formation in the Araripe Basin (Brazil)(187).

Age: Late Aptian to Early Albian (123.0-110.8 Ma)(190).

Used as calibration: Yes.

Sampled species: *Astyanax mexicanus*, *Electrophorus electricus*.

### **Characiformes (Order)**

Monophyly support: BS 100% (ref<sup>25</sup>) GGI 100% (ref(191)).

Possible sister groups: The clade combining Gymnotiformes (Order) and Siluriformes (Order)(191).

Diagnostic characters: Seven synapomorphies(175).

Earliest record: †*Santanichthys diasii* (Silva Santos, 1958).

Formation: Romualdo Member of the Santana Formation in the Araripe Basin (Brazil)(187).

Age: Late Aptian to Early Albian (123.0-110.8 Ma)(190).

Used as calibration: Yes.

Sampled species: *Astyanax mexicanus*.

### **Euteleosteomorpha (Cohort)**

Monophyly support: BS 100% (ref(27)).

Possible sister groups: Otomorpha (Cohort)(27).

Diagnostic characters: Three synapomorphies(175).

Earliest record: †*Leptolepides sprattiformis* Blainville, 1818 (ref(182)).

Formation: Lithographic limestone of Cerin (Ain, France).

Age: Kimmeridgian (157.3-152.1 Ma)(183).

Used as calibration: Yes.

Sampled species: 63 species.

### **Esociformes (Order)**

Monophyly support: BS 100% (ref(27)).

Possible sister groups: Salmoniformes (Order)(27). The monophyly of a clade combining the two orders Esociformes and Salmoniformes is strongly supported by molecular data(27)(192).

Diagnostic characters: Five synapomorphies(193).

Earliest record: †*Estesesox foxi*(194)

Formation: Milk River Formation (southern Alberta, Canada)(194).

Age: 84.5-83.5 Ma(195).

Used as calibration: Yes.

Sampled species: *Esox lucius*.

### **Salmoniformes (Order)**

Monophyly support: BS 100% (ref(27)).

Possible sister groups: Esociformes (Order)(27). The monophyly of the two orders Esociformes and Salmoniformes, to the exclusion of the orders Galaxiiformes and Argentiniformes, is strongly supported by molecular data(27, 192).

Diagnostic characters: Six synapomorphies(175) given for "Salmonoidei".

Earliest record: †*Eosalmo driftwoodensis* Wilson, 1977.

Formation: Driftwood Creek Formation (British Columbia, Canada)(196).

Age: 52.1-51.4 Ma(197, 198).

Used as calibration: Yes.

Sampled species: *Salmo salar*.

### **Stomiatiiformes (Order)**



Monophyly support: BS 100% (ref(27)).  
Possible sister groups: Osmeriformes (Order)(27).  
Diagnostic characters: Ten synapomorphies(175).  
Earliest record: †*Telepholis* von der Marck and Schlüter, 1868 (ref(199)).  
Formation: Coesfeld Member of the deposits of Sendenhorst in the Münster Basin (Westphalia, Germany)(199).  
Age: Campanian (83.6-72.1 Ma)(199).  
Used as calibration: Yes.  
Sampled species: *Borostomias antarcticus*.

### **Osmeriformes (Order)**

Monophyly support: BS 100% (ref(27)).  
Possible sister groups: Stomiatiformes (Order)(27).  
Diagnostic characters: No synapomorphies are known for the phylogeny-based circumscription of Osmeriformes, combining Osmeridae, Plecoglossidae, Retropinnidae, and Salangidae(27, 31).  
Earliest record: †*Enoplophthalmus schlumbergeri* Sauvage, 1880 (ref(200)).  
Formation: Formation de Campagne-Calavon near Céreste (France)(200).  
Age: Lower Oligocene (33.9-28.1 Ma)(200).  
Used as calibration: No.  
Sampled species: *Osmerus eperlanus*.

### **Neoteleostei (Subcohort)**

Monophyly support: BS 100% (ref(27)).  
Possible sister groups: Stomiatii (Subcohort), the clade combining Stomiatii (Subcohort) and Argentiniformes (Order)(192).  
Diagnostic characters: No synapomorphies are known for the phylogeny-based circumscription of Neoteleostei, combining Ateleopodia and Eurypterygia(27).  
Earliest record: †*Atolvorator longipectoralis* Gallo and Coelho, 2008 (see below, Eurypterygia).  
Formation: Morro do Chaves Member of the Coqueiro Seco Formation in the Sergipe-Alagoas Basin (Brazil)(201).  
Age: Barremian (129.4-125.0)(201).  
Used as calibration: No.  
Sampled species: 59 species.

### **Ateleopodia (Infracohort)**

Monophyly support: BS 100% (ref(27)).  
Possible sister groups: Eurypterygia (Infracohort)(27).  
Diagnostic characters: Seven synapomorphies(175).  
Earliest record: No skeletal fossils are known of Ateleopodia.  
Formation: NA.  
Age: NA.  
Used as calibration: No.  
Sampled species: *Guentherus altivela*.

### **Eurypterygia (Infracohort)**

Monophyly support: BS 96% (ref(27)).  
Possible sister groups: Ateleopodia (Infracohort)(27).  
Diagnostic characters: Five synapomorphies(175).

Earliest record: †*Atolvorator longipectoralis* Gallo and Coelho, 2008. Eurypterygia combine the two sections Cyclosquamata and Ctenosquamata(27). No stem-group fossils are known for Eurypterygia and Ctenosquamata appear in the fossil record later than Cyclosquamata. Thus, the earliest fossil record of Eurypterygia is †*Atolvorator longipectoralis*, the oldest member of Cyclosquamata(184, 201).

Formation: Morro do Chaves Member of the Coqueiro Seco Formation in the Sergipe-Alagoas Basin (Brazil)(201).

Age: Barremian (129.4-125.0)(201).

Used as calibration: Yes.

Sampled species: 58 species.

### **Cyclosquamata (Section)**

Monophyly support: BS 100% (ref(27)).

Possible sister groups: Ctenosquamata (Section)(27).

Diagnostic characters: Seven synapomorphies(175).

Earliest record: †*Atolvorator longipectoralis* Gallo and Coelho, 2008 (ref(184, 201)).

Formation: Morro do Chaves Member of the Coqueiro Seco Formation in the Sergipe-Alagoas Basin (Brazil)(201).

Age: Barremian (129.4-125.0)(201).

Used as calibration: Yes.

Sampled species: *Parasudis fraserbrunneri*, *Synodus synodus*.

### **Ctenosquamata (Section)**

Monophyly support: BS 97% (ref(27)), BPP 1.0 (ref(30)).

Possible sister groups: Cyclosquamata (Section)(27).

Diagnostic characters: Five synapomorphies(175).

Earliest record: †*Xenyllion zonensis* Wilson and Murray, 1996, or †*Plesioberyx maximus* Gayet, 1980, †*Plesioberyx discoides* Gayet, 1980, †*Caproberyx pharsus* Patterson, 1967, †*Stichopteryx lewisi* Davis, 1887, †*Plectocretacicus clarae* Sorbini, 1979, †*Pharmacichthys venenifer* Smith Woodward, 1942, †*Pharmacichthys numismalis* Gayet, 1980a, *Aipichthys minor* (Pictet, 1850), and *Freigichthys elleipsis* Otero, 1997, or †*Pharmacichthys judensis* Gayet, 1980b, or †*Muhichthys cordobai* González-Rodríguez & Fielitz, 2008, †*Handuichthys interopercularis*, †*Pseudomonocentris microspinosus*, and †*Dalgoichthys tropicalis* González-Rodríguez et al. 2013. Ctenosquamata combine the two subsections Myctophata and Acanthomorphata(27). No stem-group fossils are known for Ctenosquamata and Myctophata appear in the fossil record later than Acanthomorphata. Thus, the earliest fossil record of Ctenosquamata is represented by the oldest members of Acanthomorphata.

Formation: Fish Scales Formation in north-western Alberta (Canada)(202), Lithographic Limestone of Haqil (Lebanon)(203, 204), Amminadav Formation at Ein Yabrud (Palestine)(205), and El Doctor Formation in Hidalgo (Mexico)(206, 207).

Age: 113.0-98.0 Ma. Both the Fish Scales Formation and the El Doctor Formation are Albian (113.0-100.5 Ma) to Cenomanian (100.5-93.9 Ma) in age(208) and co-occurrence with *Neogastrolites americanus* gives the minimum age of 97.53 Ma for †*Xenyllion zonensis*(209, 210). The occurrence of *Mantelliceras mantelli* in the Cenomanian Lithographic Limestone of Haqil(177) and the Amminadav Formation(211) indicates an age of at least 98.0 Ma (ref(177)).

Used as calibration: Yes.

Sampled species: 56 species.

### **Myctophata (Subsection)**

Monophyly support: BS 100% (ref(27)).

Possible sister groups: Acanthomorpha (Subsection)(27).

Diagnostic characters: Seven synapomorphies(175).

Earliest record: †*Sardinioides* spp. van der Marck, 1858 (ref(184, 199)).

Formation: Coesfeld Member of the deposits of Sendenhorst in the Münster Basin (Westphalia, Germany)(199).

Age: Campanian (83.6-72.1 Ma)(199).

Used as calibration: Yes.

Sampled species: *Bentosema glaciale*.

### **Acanthomorpha (Subsection)**

Monophyly support: BS 97% (ref(27)), BPP 1.0 (ref(30)).

Possible sister groups: Myctophata (Subsection)(27).

Diagnostic characters: Nine synapomorphies(175).

Earliest record: †*Xenyllion zonensis* Wilson and Murray, 1996, or †*Plesioberyx maximus* Gayet, 1980, †*Plesioberyx discoides* Gayet, 1980, †*Caproberyx pharsus* Patterson, 1967, †*Stichopteryx lewisi* Davis, 1887, †*Plectocretacicus clarae* Sorbini, 1979, †*Pharmacichthys venenifer* Smith Woodward, 1942, †*Pharmacichthys numismalis* Gayet, 1980a, †*Aipichthys minor* (Pictet, 1850), and †*Freigichthys elleipsis* Otero, 1997, or †*Pharmacichthys judensis* Gayet, 1980b, or †*Muhichthys cordobai* González-Rodríguez & Fielitz, 2008, †*Handuichthys interopercularis*, †*Pseudomonocentris microspinosus*, and †*Dalgoichthys tropicalis* González-Rodríguez et al. 2013.

Formation: Fish Scales Formation in north-western Alberta (Canada), Lithographic Limestone of Haqil (Lebanon)(203, 204), Amminadav Formation at Ein Yabrud (Palestine)(205), and El Doctor Formation in Hidalgo (Mexico)(206, 207).

Age: 113.0-98.0 Ma (see above, Ctenosquamata).

Used as calibration: Yes.

Sampled species: 55 species.

### **Polymixiapterygii (Division)**

Monophyly support: BS 100% (ref<sup>25</sup>).

Possible sister groups: Euacanthomorpha (Division), Lamprapterygii (Division), Percopsaria (Series), Zeiogadaria (Series)(27, 30).

Diagnostic characters: Two synapomorphies(175).

Earliest record: †*Homonotichthys rotundus* Smith Woodward, 1902 (ref(29)).

Formation: English Chalk of Malling and Brighton (United Kingdom)(212).

Age: Middle to upper Cenomanian (96.5-93.9 Ma)(29). †*Homonotichthys rotundus* is recorded from the zone of †*Holaster subglobosus*, which can be constrained as middle to upper Cenomanian(211).

Used as calibration: Yes.

Sampled species: *Polymixia japonica*.

### **Percopsaria (Series)**

Monophyly support: BS 100% (ref(27)).

Possible sister groups: Polymixiapterygii (Division), Zeiogadaria (Series)(27).

Diagnostic characters: Two synapomorphies(175).

Earliest record: †*Mcconichthys longipinnis* Grande, 1988 (ref(213, 214)).

Formation: Tullock Formation in eastern Montana(46).

Age: 66.0-65.0 (ref(215)).

Used as calibration: Yes.

Sampled species: *Percopsis transmontana*, *Typhlichthys subterraneus*.

### **Zeiogadaria (Series)**

Monophyly support: BS 98% (ref<sup>25</sup>). BPP 1.0 (ref(30)).

Possible sister groups: Polymixiapterygii (Division), Percopsaria (Series)(27, 30).

Diagnostic characters: No synapomorphies are known for the phylogeny-based circumscription of Zeiogadaria, combining Zeariae and Gadariae(27).

Earliest record: †*Cretazeus rinaldii* Tyler et al., 2000 (ref(216)).

Formation: Calcare di Melissano at Cavetta near Nardò (Italy)(217).

Age: 89.8-82.0 Ma(218, 219).

Used as calibration: No.

Sampled species: *Cyttopsis rosea*, *Zeus faber*, *Stylephorus chordatus*, *Bathygadus melanobranchus*, *Gadus morhua*.

### **Zeariae (Subseries)**

Monophyly support: BS 100% (ref(27)).

Possible sister groups: Gadariae (Subseries)(27, 30).

Diagnostic characters: Twelve synapomorphies(175).

Earliest record: †*Cretazeus rinaldii* Tyler et al., 2000 (ref(216)).

Formation: Calcare di Mellissano near Nardò (Italy)(217).

Age: 89.8-82.0 Ma(218, 219).

Used as calibration: Yes.

Sampled species: *Cyttopsis rosea*, *Zeus faber*.

### **Gadariae (Subseries)**

Monophyly support: BS 100% (ref(27)), BPP 1.0 (ref(30))

Possible sister groups: Zeariae (Subseries)(27, 30).

Diagnostic characters: No synapomorphies are known for the phylogeny-based circumscription of Gadariae, combining Stylephoriformes and Gadiformes<sup>25</sup>.

Earliest record: †"*Protocodus*" sp. (see below, Gadiformes).

Formation: Eqaalulik Formation (Greenland)(30, 220).

Age: 62.8-59.7 Ma(30, 221)

Used as calibration: No.

Sampled species: *Stylephorus chordatus*, *Bathygadus melanobranchus*, *Gadus morhua*.

### **Stylephoriformes (Order)**

Monophyly support: Monotypic.

Possible sister groups: Gadiformes (Order)(27, 30).

Diagnostic characters: All diagnostic characters of *Stylephorus chordatus*.

Earliest record: No fossils are known of Stylephoriformes.

Formation: NA.

Age: NA.

Used as calibration: No.

Sampled species: *Stylephorus chordatus*.

### **Gadiformes (Order)**

Monophyly support: BS 100% (ref(27, 30)).

Possible sister groups: Stylephoriformes (Order)(27, 30).

Diagnostic characters: Five synapomorphies(175).

Earliest record: †"*Protocodus*" sp. While a formal description has never been published, a nearly complete specimen assigned to †"*Protocodus*" at the Mineralogical and Geological Museum of the University of Copenhagen has often been considered the earliest skeletal fossil record of Gadiformes(220, 222-226).

Formation: Eqaalulik Formation (Greenland)(30, 220).

Age: 62.8-59.7 Ma(30, 221).

Used as calibration: Yes.

Sampled species: *Bathygadus melanobranchus*, *Gadus morhus*.

### **Lampripterygii (Division)**

Monophyly support: BS 100% (ref(27)).

Possible sister groups: Euacanthomorphacea (Division), Polymixiacea (Division), Percopsaria (Series), Zeiogadaria (Series)(27, 30).

Diagnostic characters: Five synapomorphies(175).

Earliest record: †*Pharmacichthys venenifer* Smith Woodward, 1942, †*Pharmacichthys numismalis* Gayet, 1980a, †*Pharmacichthys judensis* Gayet, 1980b, †*Aipichthys minor* (Pictet, 1850), †*Freigichthys elleipsis* Otero, 1997. Specimens of these species are recorded from the deposits of Haqil and Ein Yabrud, which predate other occurrences of Lampripterygii(205).

Formation: Lithographic Limestone of Haqil (Lebanon), and Amminadav Formation at Ein Yabrud (Palestine)(204, 205).

Age: 100.5-98.0 Ma.

Used as calibration: Yes.

Sampled species: *Regalecus glesne*, *Lampris guttatus*.

### **Acanthopterygii (Division)**

Monophyly support: BS 99% (ref(27)), BPP 1.0 (ref(30)).

Possible sister groups: Lampripterygii (Division), Polymixiacea (Division), Percopsaria (Series), Zeiogadaria (Series)(27, 30).

Diagnostic characters: Three synapomorphies(227).

Earliest record: †*Plesioberyx maximus* Gayet, 1980, †*Plesioberyx discoides* Gayet, 1980, †*Caproberyx pharsus* Patterson, 1967, †*Stichopteryx lewisi* Davis, 1887, and †*Plectocretacicus clarae* Sorbini, 1979 (ref(29)), or †*Handuichthys interopercularis* and †*Pseudomonocentris microspinosus*(206).

Formation: Lithographic Limestone of Haqil (Lebanon)(203, 204, 228) and El Doctor Formation in Hidalgo (Mexico)(206, 207).

Age: 113.0-98.0 Ma (see above, Ctenosquamata).

Used as calibration: Yes.

Sampled species: 45 species.

### **Trachichthyiformes (Order)**

Monophyly support: BS 100% (ref(27, 229)), BPP 1.0 (ref(24)).

Possible sister groups: Holocentrimorphaceae (Subdivision), Beryciformes (Order), Percomorphaceae (Subdivision)(27).

Diagnostic characters: Three synapomorphies(230).

Earliest record: †*Stichopteryx lewisi* Davis, 1887 (ref(231)).

Formation: Lithographic Limestone of Haqil (Lebanon)(203, 232).

Age: 100.5-98.0 Ma(177).

Used as calibration: Yes.

Sampled species: *Diretmoides pauciradiatus*, *Gephyroberyx darwinii*.

### **Beryciformes (Order)**

Monophyly support: The monophyly of a clade combining Barbourisiidae, Berycidae, Cetomimidae, Megalomycteridae, Melamphaidae, Mirapinnidae, and Rondeletiidae is supported by BS 84 (ref(27)) and corroborated by BPP 1.0 (ref(24)) for the monophyly of the Berycidae, Cetomimidae, Rondeletiidae (other members of the clade were not included). The addition of Stephanoberycidae to this clade is supported by BPP 1.0 (ref(24, 30)).

The inclusion of Gibberichthyidae, Megalomycteridae, Mirapinnidae and Hispidoberycidae in this clade is assumed based on the taxonomic placement of Gibberichthyidae, Megalomycteridae, and Mirapinnidae within superfamily Cetomimoidea(233) and the placement of Hispidoberycidae in superfamily Stephanoberycidae(233).

Possible sister groups: Trachichthyiformes (Order), Holocentrimorphaceae (Subdivision), Percomorphaceae (Subdivision)(27).

Diagnostic characters: No synapomorphies are known for the phylogeny-based circumscription of Beryciformes.

Earliest record: †*Berycomorus firdoussii* Arambourg, 1967 (ref(234)).

Formation: Elam Formation (Iran)(235).

Age: Rupelian (33.9-28.1 Ma).

Used as calibration: No.

Sampled species: *Acanthochaenus luetkenii*, *Beryx splendens*.

### **Holocentrimorphaceae (Subdivision)**

Monophyly support: BS 100% (27), BPP 1.0 (ref(24)).

Possible sister groups: Trachichthyiformes (Order), Beryciformes (Order), Percomorphaceae (Subdivision)(27).

Diagnostic characters: Nine synapomorphies(236).

Earliest record: †*Caproberyx pharsus* Patterson, 1967 (ref(29)).

Formation: Lithographic Limestone of Haqil (Lebanon)(203).

Age: 100.5-98.0 Ma(177).

Used as calibration: Yes.

Sampled species: *Holocentrus rufus*, *Myripristis jacobus*.

### **Percomorphaceae (Subdivision)**

Monophyly support: BS 99% (ref(27)), BPP 1.0.

Possible sister groups: Trachichthyiformes (Order), Beryciformes, Holocentrimorphaceae (Subdivision)(27, 30) (24).

Diagnostic characters: Eight synapomorphies(175) given for "Percomorphaceae".

Earliest record: †*Plectocretacicus clarae* Sorbini, 1979, or †*Cretatriacanthus guidottii*

Tyler and Sorbini, 1996. †*Plectocretacicus clarae* has often been considered to be the earliest record of Tetraodontiformes; however, evidence for the assignment of †*Plectocretacicus clarae* to Tetraodontiformes was based on an assumed close relationship between Tetraodontiformes and Zeiformes(237), which is now known to be incorrect. Similarities between †*Plectocretacicus clarae* and recently discovered Cretaceous "monocentrid-like" acanthomorphs of Mexico(177, 206) suggest that †*Plectocretacicus clarae* may not even be a member of Percomorphaceae. In this case, †*Cretatriacanthus guidottii* would be the oldest reliable record of Percomorphaceae (Santini, priv. comm.).

Formation: Lithographic Limestone of Haqil (Lebanon)(228) and Calcare di Melissano at Canale near Nardò (Italy)(177).

Age: 100.5-98.0 Ma(177) or 89.8-82.0 Ma(218, 219).

Used as calibration: No. Due to the uncertain earliest record of Percomorphaceae, neither †*Plectocretacicus clarae* nor †*Cretatriacanthus guidottii* are used to calibrate the age of Percomorphaceae.

Sampled species: 39 species.

### **Ophidiaria (Series)**

Monophyly support: BS 100% (ref(27)).

Possible sister groups: Batrachoidaria (Series), Gobiaria (Series), Scombrimorpharia *sensu* Betancur-R. et al. 2013, Eupercaria (Series), Carangimorpharia *sensu* Betancur-R. et al. 2013 (ref(27)).

Diagnostic characters: Two probable synapomorphies(238) (239).

Earliest record: †*Pastorius methenyi* Carnevale and Johnson, 2015.

Formation: Liburnica Formation near Trebiciano (Italy)(239).

Age: Late Campanian to early Maastrichtian (76.4-69.8 Ma)(239).

Used as calibration: No.

Sampled species: *Brotula barbata*, *Carapus acus*.

### **Batrachoidaria (Series)**

Monophyly support: BS 100% (ref(27)).

Possible sister groups: Ophidiaria (Series), Gobiaria (Series), Scombrimorpharia *sensu* Betancur-R. et al. 2013, Eupercaria (Series), Carangimorpharia *sensu* Betancur-R. et al. 2013 (ref(27)).

Diagnostic characters: Nine synapomorphies(175).

Earliest record: †*Zappaichthys harzhauseri* Carnevale and Collette, 2014.

Formation: Leitha Limestone of St. Margarethen in Burgenland (Austria)(240).

Age: Late Badenian (13.8-12.8 Ma)(240, 241).

Used as calibration: Yes.

Sampled species: *Chatrabus melanurus*, *Opsanus beta*.

### **Gobiaria (Series)**

Monophyly support: BS 100% (ref(27)).

Possible sister groups: Ophidiaria (Series), Batrachoidaria (Series), Scombrimorpharia *sensu* Betancur-R. et al. 2013, Eupercaria (Series), Carangimorpharia *sensu* Betancur-R. et al. 2013 (ref(27)).

Diagnostic characters: One synapomorphy(27, 242).

Earliest record: †*Carlomonnius quasigobius* Bannikov and Carnevale, 2016,

†*Eosphaeramia margaritae* Sorbini, 1983, †*Eoapogon fraseri*, †*Bolcapogon johnsoni*, and

†*Apogoniscus pauciradiatus* Bannikov, 2005. Gobiaria combine the two orders

Kurtiformes and Gobiiformes. No stem-group fossils are known for Gobiaria.

Kurtiformes and Gobiformes appear simultaneously in the fossil record.

Formation: "Calcari nummulitici" at Monte Bolca near Verona (Italy)(243).

Age: 49.1-48.9. The age of the Monte Bolca deposits can be constrained to the overlap of nannoplankton zone NP 14 and shallow benthic zone SBZ 11.

Used as calibration: Yes.

Sampled species: *Lesueurigobius cf. sanzi*, *Periophthalmodon schlosseri*.

### **Scombrimorpharia *sensu* Betancur-R. et al. 2013**

Monophyly support: BS 97% (ref(27)), BP 1.0 (ref(24)).  
Possible sister groups: Ophidiaria (Series), Batrachoidaria (Series), Gobiaria (Series), Eupercaria (Series), Carangimorpharia *sensu* Betancur-R. et al. 2013 (ref(27)).  
Diagnostic characters: No synapomorphies are known for the phylogeny-based circumscription of Scombrimorpharia *sensu* Betancur-R. et al. 2013, combining Scombriformes and Syngnathiformes(27).  
Earliest record: †*Gasterorhamphosus zuppichinii* Sorbini, 1981. No stem-group fossils are known for Scombrimorpharia *sensu* Betancur-R. et al. 2013 and Scombriformes appear in the fossil record later than Syngnathiformes(244). Thus, the earliest fossil record of Scombrimorpharia *sensu* Betancur-R. et al. 2013 is †*Gasterorhamphosus zuppichinii*, the oldest member of Syngnathiformes(244).  
Formation: Calcare di Melissano at Cavetta near Nardò (Italy)(219).  
Age: 89.8-82.0 Ma(218, 219).  
Used as calibration: No.  
Sampled species: 16 species.

### **Pelagiaria (Series)**

Monophyly support: BS 100% (ref(27)).  
Possible sister groups: Syngnatharia (Series)(27).  
Diagnostic characters: Six synapomorphies(175).  
Earliest record: †*Eutrichiurides opiensis* (Leriche 1906) Casier, 1944, †*Sphyraenodus multidentatus* Darteville and Casier, 1959, †*Ardiodus mariotti* White, 1931 [a detailed discussion of the earliest scombriform records is given in the SI Appendix Material of (ref(29))].  
Formation: "Montian Phosphates, Morocco"(245), Landana Cliffs of the Cabinda enclave (Angola), and Oldhaven Beds near Upnor in Kent (United Kingdom)(29).  
Age: 66.0-56.5 Ma(29).  
Used as calibration: Yes.  
Sampled species: *Thunnus albacares*, *Thunnus orientalis*.

### **Syngnatharia (Series)**

Monophyly support: BS 97% (ref(27)).  
Possible sister groups: Pelagiaria (Series)(27).  
Diagnostic characters: No synapomorphies are known for the phylogeny-based circumscription of Syngnathiformes, combining Aulostomidae, Callionymidae, Centriscidae, Creediidae, Dactylopteridae, Draconettidae, Fistulariidae, Mullidae, Leptoscopidae, Pegasidae, Solenostomidae, and Syngnathidae(27, 246).  
Earliest record: †*Gasterorhamphosus zuppichinii* Sorbini, 1981.  
Formation: Calcare di Melissano at Cavetta near Nardò (Italy)(219).  
Age: 89.8-82.0 Ma(218, 219).  
Used as calibration: No.  
Sampled species: *Dactylopterus volitans*, *Mullus surmuletus*, *Aeoliscus strigatus*, *Macroramphosus scolopax*, *Fistularia tabacaria*, *Doryrhamphus dactyliophorus*, *Entelurus aequoreus*, *Nerophis ophidion*, *Hippocampus comes*, *Hippocampus kuda*, *Hippocampus whitei*, *Syngnathus scovelli*, *Syngnathus rostellatus*, *Syngnathus typhle*.

### **Syngnathinae (Subfamily) *sensu* Hamilton et al. (2017)**

Monophyly support: BS 95%, BPP 1.0 (ref(35)).  
Possible sister groups: Nerophinae (Subfamily)(35).  
Diagnostic characters: Tail-bearing male brood pouch(247).



Earliest record: †*Syngnathus incompletus* Cosmovici, 1887 (ref(247)).  
Formation: IPM2 zone of the Menilite Formation in the outer Carpathian basin (Poland).  
Age: 32.9-29.7 Ma. The IPM2 zone of the Menilite Formation corresponds to nannoplankton zones NP 22 to NP 23 (ref(248)).  
Used as calibration: Yes.  
Sampled species: *Hippocampus comes*, *Hippocampus cuda*, *Hippocampus whitei*, *Syngnathus scovelli*, *Syngnathus rostellatus*, *Syngnathus typhle*.

### **Nerophinae (Subfamily) sensu Hamilton et al. (2017)**

Monophyly support: BS 99%, BPP 1.0 (ref(35)).  
Possible sister groups: Syngnathinae (Subfamily)(35).  
Diagnostic characters: Trunk-bearing male brood pouch(247).  
Earliest record: †*Hipposyngnathus neriticus* Jerzmańska, 1968 (ref(247)).  
Formation: Jamna Dolma Member of the Menilite Formation in the outer Carpathian basin (Poland).  
Age: 32.9-32.0 Ma. The Jalmna Dolma Member of the Menilite Formation is synchronous with nannoplankton zone NP 22 (ref(248)).  
Used as calibration: Yes.  
Sampled species: *Doryrhamphus dactyliophorus*, *Entelurus aequoreus*, *Nerophis ophidion*.

### **Eupercaria (Series)**

Monophyly support: BS 99% (ref(27)).  
Possible sister groups: Ophidiaria (Series), Batrachoidaria (Series), Gobiaria (Series), Scombrimorpharia sensu Betancur-R. et al. 2013, Carangimorpharia sensu Betancur-R. et al. 2013 (ref(27)).  
Diagnostic characters: No synapomorphies are known for the phylogeny-based circumscription of Eupercaria, combining Acanthuriformes, Centrarchiformes, Cirrhitiformes, Ephippiformes, Labriformes, Lophiiformes, Perciformes, Pempheriformes, Spariformes, Tetraodontiformes, and Uranoscopiformes, as well as 39 *incertae sedis* families(27).  
Earliest record: †*Plectocretacicus clarae* Sorbini, 1979, or †*Cretatriacanthus guidottii* Tyler and Sorbini, 1996 (see above, Percomorphaceae).  
Formation: Lithographic Limestone of Haqil (Lebanon)(228) and Calcare di Melissano at Canale near Nardò (Italy)(177).  
Age: 100.5-98.0 Ma(177) or 89.8-82.0 Ma(218, 219).  
Used as calibration: No.  
Sampled species: *Epinephelus aeneus*, *Scorpaena* sp., *Gasterosteus aculeatus*, *Symphodus melops*, *Takifugu rubripes*, *Dichotomyctere nigroviridis*.

### **Anabantaria (Series)**

Monophyly support: BS 94% (ref(27)).  
Possible sister groups: Carangaria (Series), Ovalentaria (Series)(27, 30).  
Diagnostic characters: No synapomorphies are known for the phylogeny-based circumscription of Anabantomorphariae, combining Synbranchiformes and Anabantiformes(27).  
Earliest record: †*Eochanna chorlakkensis* Roe, 1991 (see below, Anabantiformes).  
Formation: Kuldana Formation near Chorlakk in the Kohat District (Pakistan).  
Age: 48.8-43.6 Ma.  
Used as calibration: No.  
Sampled species: *Anabas testudineus*, *Monopterus albus*.

### **Anabantiformes (Order)**

Monophyly support: BS 100% (ref(27)).

Possible sister groups: Synbranchiformes (Order)(27).

Diagnostic characters: Seven synapomorphies(175).

Earliest record: †*Eochanna chorlakkensis* Roe, 1991 (ref(182, 249)).

Formation: Kuldana Formation near Chorlakk in the Kohat District (Pakistan).

Age: 48.8-43.6 Ma. The Kuldana Formation can be constrained to shallow benthic zones SB 12 to SB 13 (ref(250)).

Used as calibration: Yes.

Sampled species: *Anabas testudineus*.

### **Synbranchiformes (Order)**

Monophyly support: BS 98% (ref(27)).

Possible sister groups: Anabantiformes (Order)(27).

Diagnostic characters: No synapomorphies are known for the phylogeny-based circumscription of Synbranchiformes, combining Chaudhuriidae, Indostomidae, Mastacembelidae, and Synbranchidae(27).

Earliest record: No fossils are known of Synbranchiformes.

Formation: NA.

Age: NA.

Used as calibration: No.

Sampled species: *Monopterus albus*.

### **Carangaria (Series)**

Monophyly support: BS 100% (ref(27)).

Possible sister groups: Anabantaria (Series), Ovalentaria (Series)(27).

Diagnostic characters: No synapomorphies are known for the phylogeny-based circumscription of Carangaria, combining Istiophoriformes, Carangiformes, and Pleuronectiformes(27).

Earliest record: †*Hemingwaya sarissa* Sytchevskaya and Prokofiev, 2002 (ref(251)).

Formation: Danata Formation near Uylya-Kushlyuk (Turkmenistan).

Age: Thanetian (59.2-56.0 Ma)(252)

Used as calibration: No.

Sampled species: *Caranx melampygus*, *Cynoglossus semilaevis*.

### **Ovalentaria (Series)**

Monophyly support: BS 100% (ref(27, 253)).

Possible sister groups: Anabantaria (Series), Carangaria (Series)(27).

Diagnostic characters: Demersal, adhesive eggs with chorionic filaments(253).

Earliest record: †*Palaeopomacentrus orphae* Bellwood and Sorbini, 1996, †*Lorenzichthys olihan* Bellwood, 1999, †*Oncolepis isseli* Bassani, 1898, and †*Rhamphexoetus volans* Bannikov et al., 1985. Older records based on otoliths and "Poeciliidae indet." are not considered here [see discussion in the SI Appendix Material of (29)].

Formation: "Calcarei nummulitici" at Monte Bolca near Verona (Italy)(243).

Age: 49.1-48.9.

Used as calibration: No. As the single known synapomorphy of Ovalentaria would likely not be recognized in the fossil record, direct assignment of fossils to this clade would probably not be possible.

Sampled species: *Chromis chromis*, *Pseudochromis fuscus*, *Amphilophus citrinellus*,

*Oreochromis niloticus*, *Oryzias latipes*, *Poecilia formosa*, *Xiphophorus maculatus*.

### **Pseudocrenilabrinae (Subfamily)**

Monophyly support: BS 100% (ref(29)).

Possible sister groups: Cichlinae (Subfamily)(29).

Diagnostic characters: No synapomorphies are known for Pseudocrenilabrinae including *Heterochromis*(254). However, as all members of Pseudocrenilabrinae are geographically separated from those of other cichlid subfamilies, fossils can be assigned directly to Pseudocrenilabrinae, not only through synapomorphies with subclades.

Earliest record: †*Mahengechromis* spp. Murray, 2000 (ref(255)).

Formation: Mahenge paleolake in the Singida District (Tanzania)(255).

Age: 46.0-45.0 Ma(256).

Used as calibration: Yes.

Sampled species: *Oreochromis niloticus*.

### **Cichlinae (Subfamily)**

Monophyly support: BS 98% (ref(29)).

Possible sister groups: Pseudocrenilabrinae (Subfamily)(29).

Diagnostic characters: No synapomorphies are known for Cichlinae excluding *Heterochromis* (254). However, as all members of Cichlinae are geographically separated from those of other cichlid subfamilies, fossils can be assigned directly to Cichlinae, not only through synapomorphies with subclades.

Earliest record: *Gymnogeophagus* †*eoecenicus* Malabarba, Malabarba, and del Papa, 2010, †*Plesioheros chauliodus* Alano Perez, Malabarba, and del Papa, 2010, and †*Proterocara argentina* Malabarba, Zuleta, and del Papa, 2006 (ref(257-259)).

Formation: Lumbreira Formation in the Salta Province (Argentina).

Age: 45.4-39.9 Ma(29).

Used as calibration: Yes.

Sampled species: *Amphilophus citrinellus*.

## 10. SI Appendix Data Set 3

Gene trees used for the aBSREL test for positive selection. Node labels refer to those listed in SI Appendix Table S11.

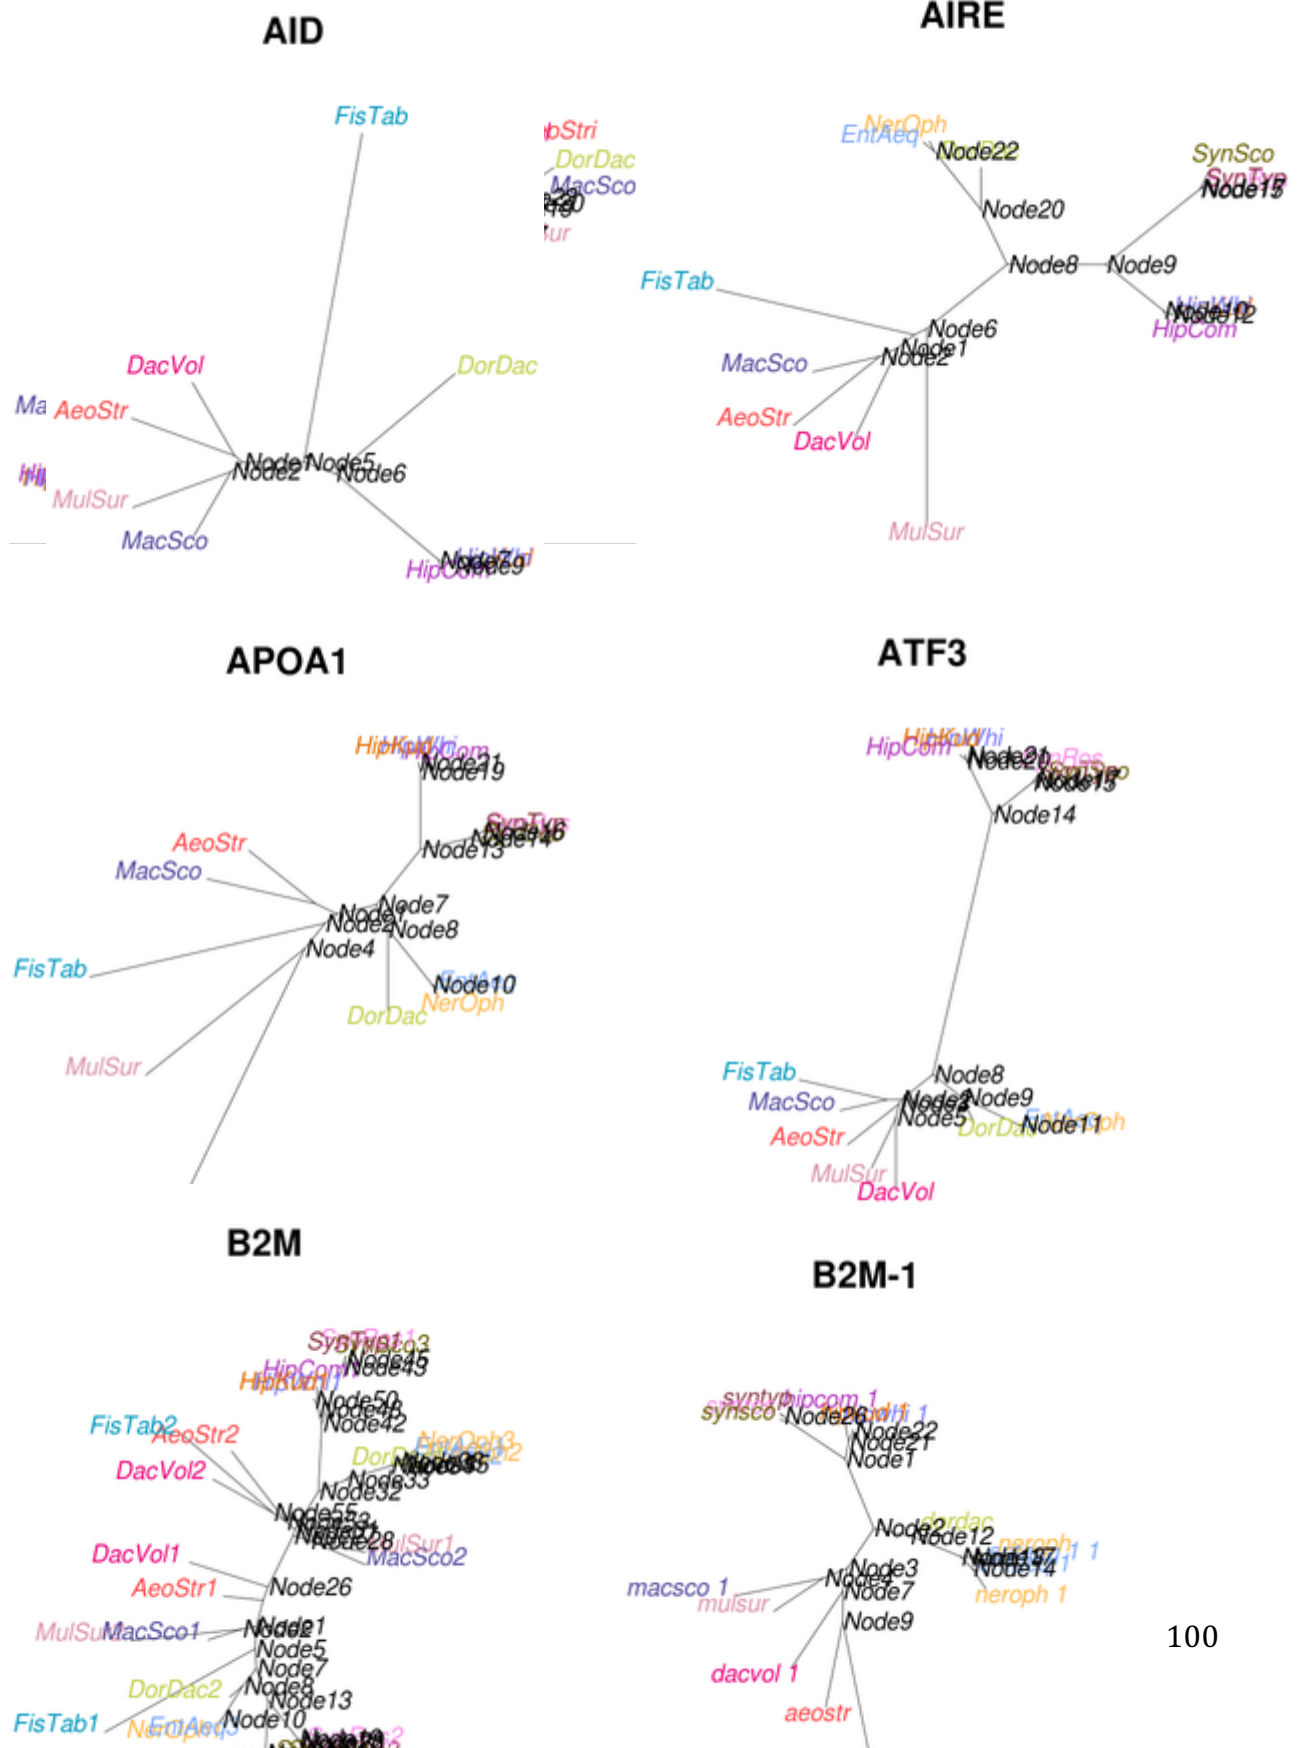

**B2M-2**

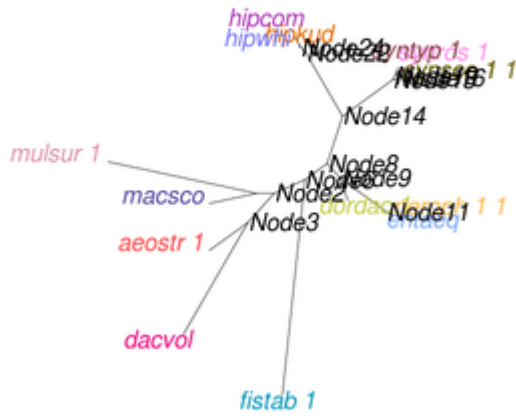

**Ca4**

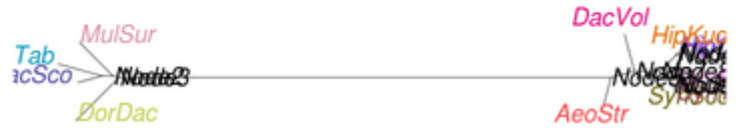

**CD4**

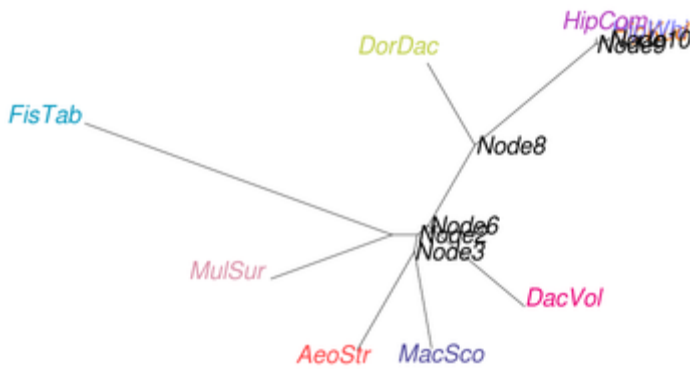

**CD74**

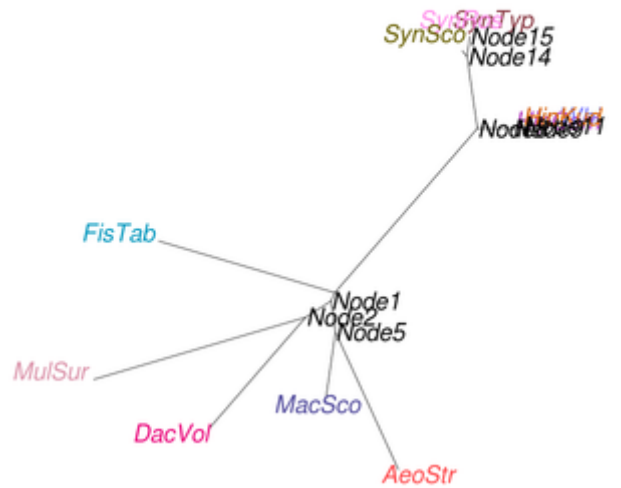

**CD8**

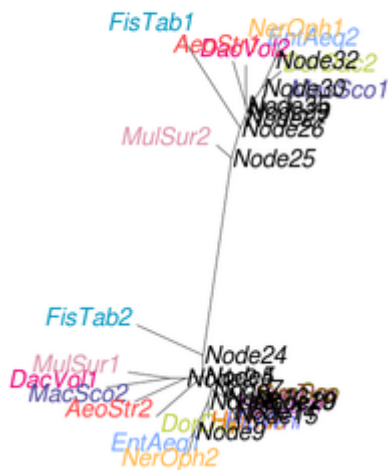

**CD8-alpha**

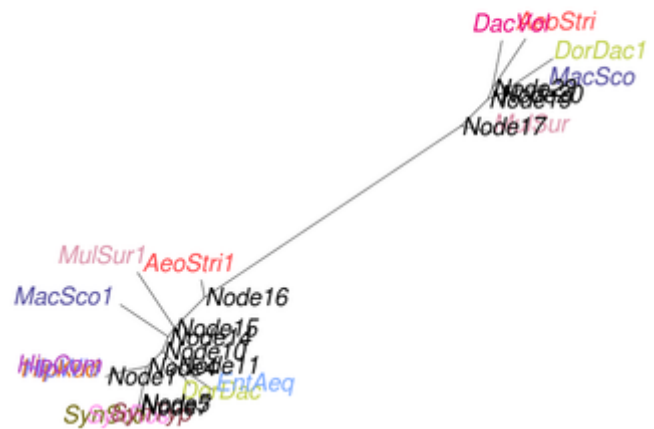





### PRKCD-1

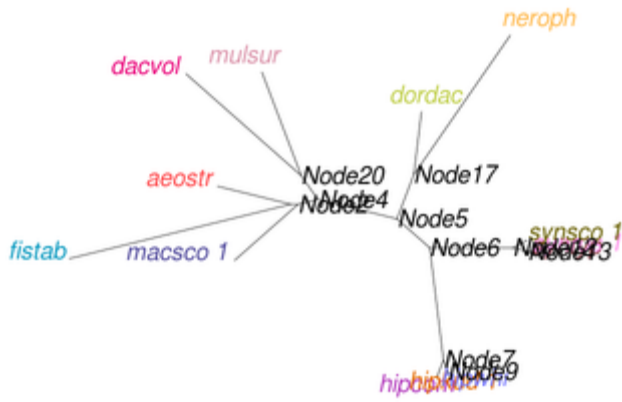

### PRKCD-2

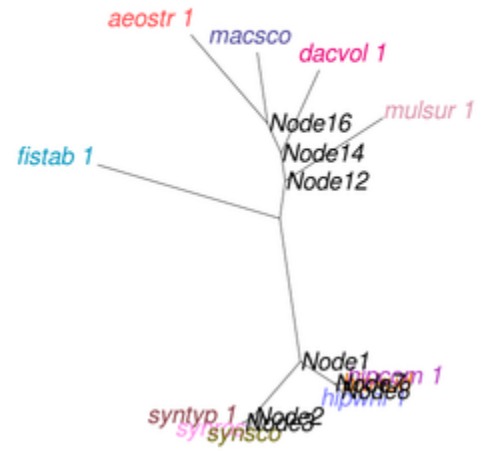

### PTGFRN

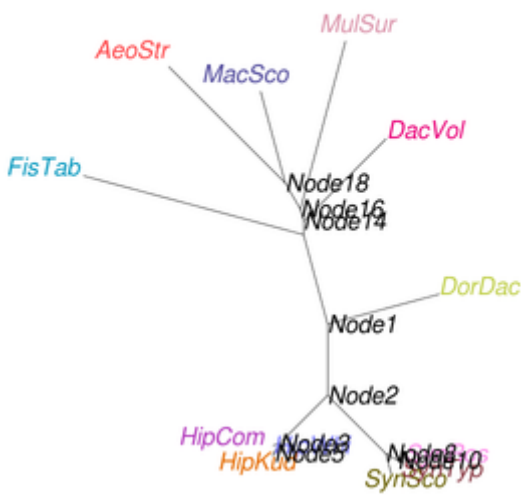

### RAG1

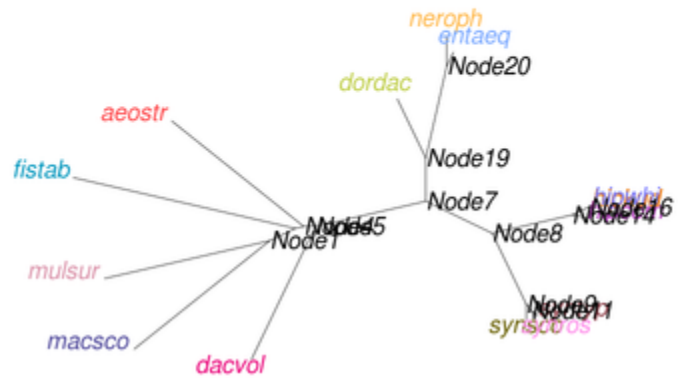

### RAG2

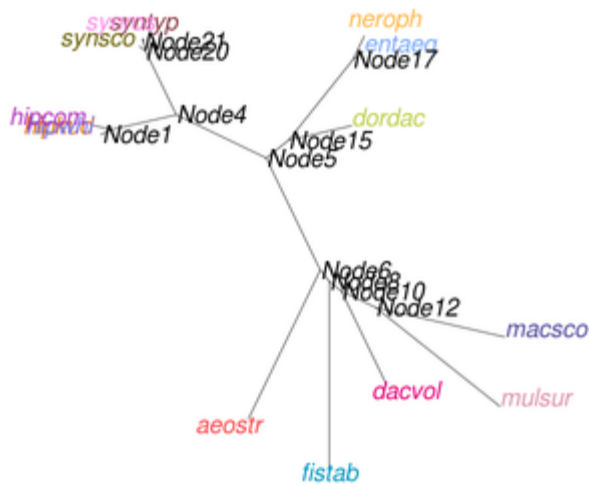

### RHAG

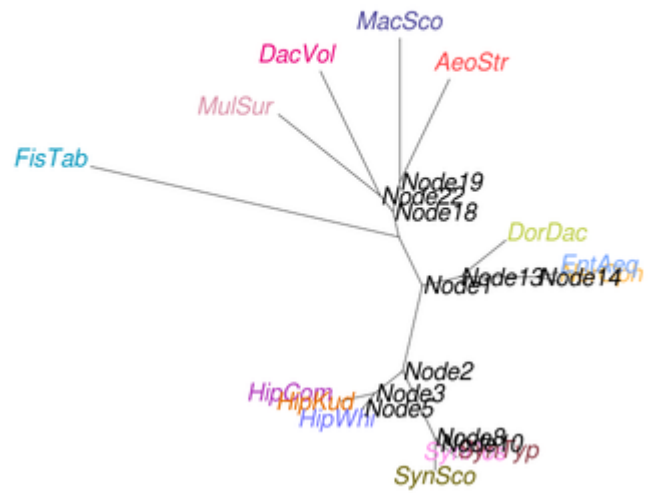



### TAPs

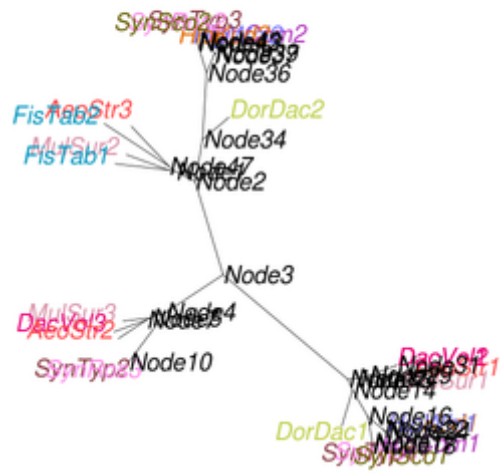

### TAPs-1

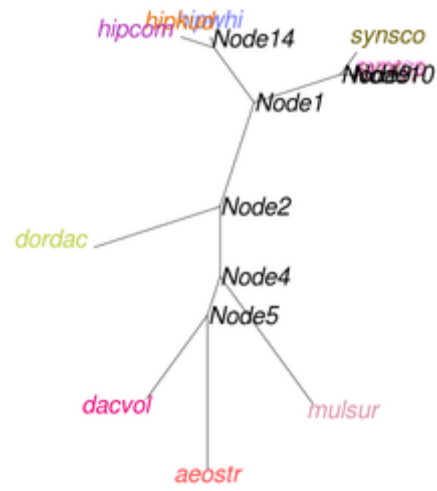

### TAPs-2

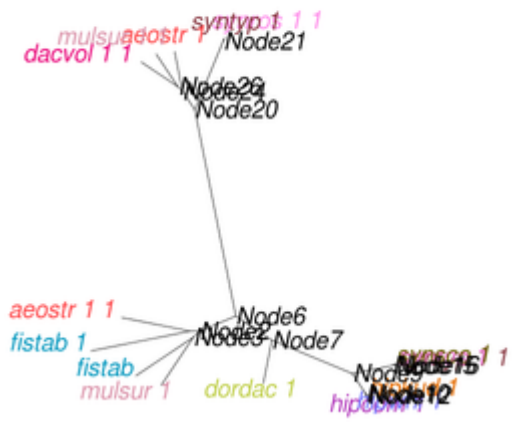

### TF

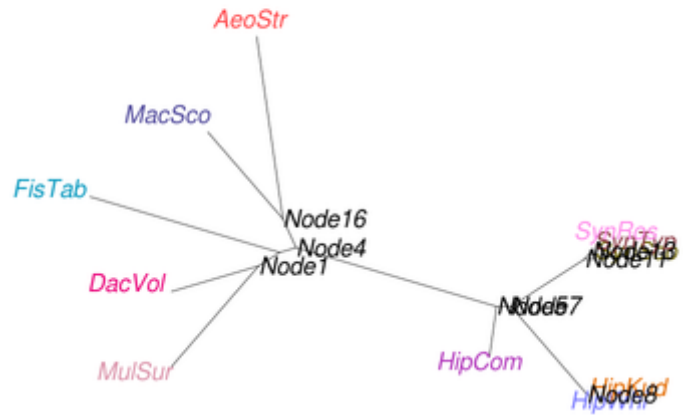

## References

1. M. A. Nowak, K. T. Tarczy-Hornoch, J. M. Austyn, The optimal number of major histocompatibility complex molecules in an individual. *Proc Natl Acad Sci USA* **89**, 10896 - 10899 (1992).
2. Q. Lin *et al.*, The seahorse genome and the evolution of its specialized morphology. *Nature* **540**, 395-399 (2016).
3. C. M. Small *et al.*, The genome of the Gulf pipefish enables understanding of evolutionary innovations. *Genome Biology* **17**, 258 (2016).
4. M. Malmstrøm *et al.*, Evolution of the immune system influences speciation rates in teleost fishes. *Nature Genetics* **48**, 1204-1210 (2016).
5. M. Malmstrøm, M. Matschiner, O. K. Torresen, K. S. Jakobsen, S. Jentoft, Whole genome sequencing data and de novo draft assemblies for 66 teleost species. *Scientific data* **4**, 160132 (2017).
6. S. Gnerre *et al.*, High-quality draft assemblies of mammalian genomes from massively parallel sequence data. *Proceedings of the National Academy of Sciences* **108**, 1513-1518 (2011).
7. M. Martin, Cutadapt removes adapter sequences from high-throughput sequencing reads. *EMBnet.journal* **17**, 10 (2011).
8. J. R. Miller *et al.*, Aggressive assembly of pyrosequencing reads with mates. *Bioinformatics* **24**, 2818-2824 (2008).
9. J. T. Simpson, Exploring genome characteristics and sequence quality without a reference. *Bioinformatics* **30**, 1228-1235 (2014).
10. G. Parra, K. Bradnam, Z. Ning, T. Keane, I. Korf, Assessing the gene space in draft genomes. *Nucleic Acids Research* **37**, 289-297 (2009).
11. G. Parra, K. Bradnam, I. Korf, CEGMA: a pipeline to accurately annotate core genes in eukaryotic genomes. *Bioinformatics* **23**, 1061-1067 (2007).
12. F. A. Simao, R. M. Waterhouse, P. Ioannidis, E. V. Kriventseva, E. M. Zdobnov, BUSCO: assessing genome assembly and annotation completeness with single-copy orthologs. *Bioinformatics* **31**, 3210-3212 (2015).
13. K. R. Bradnam *et al.*, Assemblathon 2: evaluating de novo methods of genome assembly in three vertebrate species. *GigaScience* **2**, 10 (2013).
14. M. G. Grabherr *et al.*, Full-length transcriptome assembly from RNA-Seq data without a reference genome. *Nature biotechnology* **29**, 644-652 (2011).
15. A. Lomsadze, V. Ter-Hovhannisyan, Y. O. Chernoff, M. Borodovsky, Gene identification in novel eukaryotic genomes by self-training algorithm. *Nucleic acids research* **33**, 6494-6506 (2005).
16. I. Korf, Gene finding in novel genomes. *BMC bioinformatics* **5**, 59 (2004).
17. C. Holt, M. Yandell, MAKER2: an annotation pipeline and genome-database management tool for second-generation genome projects. *BMC bioinformatics* **12**, 491 (2011).
18. M. S. Campbell *et al.*, MAKER-P: a tool kit for the rapid creation, management, and quality control of plant genome annotations. *Plant physiology* **164**, 513-524 (2014).
19. W. Bao, K. K. Kojima, O. Kohany, Repbase Update, a database of repetitive elements in eukaryotic genomes. *Mobile DNA* **6**, 11 (2015).
20. U. Consortium, UniProt: the universal protein knowledgebase. *Nucleic acids research* **45**, D158-D169 (2017).
21. M. S. Campbell, C. Holt, B. Moore, M. Yandell, Genome annotation and curation using MAKER and MAKER-P. *Current Protocols in Bioinformatics*, 4.11. 11-14.11. 39 (2014).

22. M. Stanke, M. Diekhans, R. Baertsch, D. Haussler, Using native and syntenically mapped cDNA alignments to improve de novo gene finding. *Bioinformatics* **24**, 637-644 (2008).
23. P. Jones *et al.*, InterProScan 5: genome-scale protein function classification. *Bioinformatics* **30**, 1236-1240 (2014).
24. Z. Musilová *et al.*, Vision using multiple distinct rod opsins in deep-sea fishes. *bioRxiv* (2018).
25. B. L. Aken *et al.*, Ensembl 2017. *Nucleic acids research* **45**, D635-D642 (2016).
26. S. F. Altschul, W. Gish, W. Miller, E. W. Myers, D. J. Lipman, Basic local alignment search tool. *Journal of molecular biology* **215**, 403-410 (1990).
27. R. Betancur-R *et al.*, The tree of life and a new classification of bony fishes. *PLoS currents* **5** (2013).
28. R. Bouckaert *et al.*, BEAST 2: a software platform for Bayesian evolutionary analysis. *PLoS computational biology* **10**, e1003537 (2014).
29. M. Matschiner *et al.*, Bayesian phylogenetic estimation of clade ages supports trans-Atlantic dispersal of cichlid fishes. *Systematic biology* **66**, 3-22 (2017).
30. M. Malmstrøm *et al.*, Evolution of the immune system influences speciation rates in teleost fishes. *Nature Genetics* **48**, 1204 (2016).
31. R. Betancur-R *et al.*, Phylogenetic classification of bony fishes. *BMC evolutionary biology* **17**, 162 (2017).
32. T. J. Near *et al.*, Resolution of ray-finned fish phylogeny and timing of diversification. *Proceedings of the National Academy of Sciences* **109**, 13698-13703 (2012).
33. D. L. Rabosky *et al.*, An inverse latitudinal gradient in speciation rate for marine fishes. *Nature* **559**, 392 (2018).
34. M. E. Alfaro *et al.*, Explosive diversification of marine fishes at the Cretaceous–Palaeogene boundary. *Nature ecology & evolution*, 1 (2018).
35. H. Hamilton *et al.*, Molecular phylogeny and patterns of diversification in Syngnathid fishes. *Molecular phylogenetics and Evolution* **107**, 388-403 (2017).
36. M. Khabbazian, R. Kriebel, K. Rohe, C. Ané, Fast and accurate detection of evolutionary shifts in Ornstein–Uhlenbeck models. *Methods in Ecology and Evolution* **7**, 811-824 (2016).
37. D. Chalopin, M. Naville, F. Plard, D. Galiana, J.-N. Volff, Comparative analysis of transposable elements highlights mobilome diversity and evolution in vertebrates. *Genome biology and evolution* **7**, 567-580 (2015).
38. A. Canapa, M. Barucca, M. A. Biscotti, M. Forconi, E. Olmo, Transposons, genome size, and evolutionary insights in animals. *Cytogenetic and genome research* **147**, 217-239 (2015).
39. O. K. Tørresen *et al.*, An improved genome assembly uncovers prolific tandem repeats in Atlantic cod. *BMC genomics* **18**, 95 (2017).
40. D. Ellinghaus, S. Kurtz, U. Willhoeft, LTRharvest, an efficient and flexible software for de novo detection of LTR retrotransposons. *BMC bioinformatics* **9**, 18 (2008).
41. J. Jurka *et al.*, Repbase Update, a database of eukaryotic repetitive elements. *Cytogenetic and genome research* **110**, 462-467 (2005).
42. S. Kumar, G. Stecher, K. Tamura, MEGA7: Molecular Evolutionary Genetics Analysis version 7.0 for bigger datasets. *Molecular biology and evolution* **33**, 1870-1874 (2016).
43. A. R. Quinlan, I. M. Hall, BEDTools: a flexible suite of utilities for comparing genomic features. *Bioinformatics* **26**, 841-842 (2010).
44. R. C. Edgar, MUSCLE: a multiple sequence alignment method with reduced time and space complexity. *BMC bioinformatics* **5**, 113 (2004).
45. J. H. Brown *et al.*, Three-dimensional structure of the human class II histocompatibility antigen HLA-DR1. *Nature* **364**, 33 (1993).

46. F. Buonocore *et al.*, Molecular cloning, differential expression and 3D structural analysis of the MHC class-II  $\beta$  chain from sea bass (*Dicentrarchus labrax* L.). *Fish & shellfish immunology* **23**, 853-866 (2007).
47. B. Rost, C. Sander, Combining evolutionary information and neural networks to predict protein secondary structure. *Proteins: Structure, Function, and Bioinformatics* **19**, 55-72 (1994).
48. A. Ceroni, A. Passerini, A. Vullo, P. Frasconi, DISULFIND: a disulfide bonding state and cysteine connectivity prediction server. *Nucleic acids research* **34**, W177-W181 (2006).
49. A. Stamatakis, RAxML version 8: a tool for phylogenetic analysis and post-analysis of large phylogenies. *Bioinformatics* **30**, 1312-1313 (2014).
50. J. D. Thompson, T. J. Gibson, F. Plewniak, F. Jeanmougin, D. G. Higgins, The CLUSTAL\_X windows interface: flexible strategies for multiple sequence alignment aided by quality analysis tools. *Nucleic acids research* **25**, 4876-4882 (1997).
51. M. Tine *et al.*, European sea bass genome and its variation provide insights into adaptation to euryhalinity and speciation. *Nature communications* **5**, 5770 (2014).
52. B. Star *et al.*, The genome sequence of Atlantic cod reveals a unique immune system. *Nature* **477**, 207-210 (2011).
53. U. Grimholt *et al.*, A comprehensive analysis of teleost MHC class I sequences. *BMC evolutionary biology* **15**, 32 (2015).
54. A. Bahr, A. B. Wilson, The evolution of MHC diversity: evidence of intralocus gene conversion and recombination in a single-locus system. *Gene* **497**, 52-57 (2012).
55. K. Wegner *et al.*, Genetic variation in MHC class II expression and interactions with MHC sequence polymorphism in three-spined sticklebacks. *Molecular Ecology* **15**, 1153-1164 (2006).
56. R. Cerri *et al.*, Effects of lactation and pregnancy on gene expression of endometrium of Holstein cows at day 17 of the estrous cycle or pregnancy. *Journal of dairy science* **95**, 5657-5675 (2012).
57. S. L. K. Pond, S. V. Muse, "HyPhy: hypothesis testing using phylogenies" in *Statistical methods in molecular evolution*. (Springer, 2005), pp. 125-181.
58. S. Weaver *et al.*, Datamonkey 2.0: a modern web application for characterizing selective and other evolutionary processes. *Molecular biology and evolution* **35**, 773-777 (2018).
59. M. D. Smith *et al.*, Less is more: an adaptive branch-site random effects model for efficient detection of episodic diversifying selection. *Molecular biology and evolution* **32**, 1342-1353 (2015).
60. B. Murrell *et al.*, Detecting individual sites subject to episodic diversifying selection. *PLoS genetics* **8**, e1002764 (2012).
61. T. Borza, C. Stone, A. K. Gamperl, S. Bowman, Atlantic cod (*Gadus morhua*) hemoglobin genes: multiplicity and polymorphism. *BMC genetics* **10**, 51 (2009).
62. J. C. Opazo, G. T. Butts, M. F. Nery, J. F. Storz, F. G. Hoffmann, Whole-genome duplication and the functional diversification of teleost fish hemoglobins. *Molecular biology and evolution* **30**, 140-153 (2012).
63. J. Feng *et al.*, Channel catfish hemoglobin genes: identification, phylogenetic and syntenic analysis, and specific induction in response to heat stress. *Comparative Biochemistry and Physiology Part D: Genomics and Proteomics* **9**, 11-22 (2014).
64. M. Berenbrink, Historical reconstructions of evolving physiological complexity: O<sub>2</sub> secretion in the eye and swimbladder of fishes. *Journal of Experimental Biology* **210**, 1641-1652 (2007).
65. T. Brittain, Root effect hemoglobins. *Journal of Inorganic Biochemistry* **99**, 120-129 (2005).

66. R. C. Hardison, Evolution of hemoglobin and its genes. *Cold Spring Harbor perspectives in medicine* **2**, a011627 (2012).
67. C. Trapnell *et al.*, Differential gene and transcript expression analysis of RNA-seq experiments with TopHat and Cufflinks. *Nature protocols* **7**, 562-578 (2012).
68. D. Kim *et al.*, TopHat2: accurate alignment of transcriptomes in the presence of insertions, deletions and gene fusions. *Genome biology* **14**, R36 (2013).
69. L. Goff, C. Trapnell, D. Kelley, cummeRbund: Analysis, exploration, manipulation, and visualization of Cufflinks high-throughput sequencing data. *R package version 2* (2013).
70. M. C. Brandley, R. L. Young, D. L. Warren, M. B. Thompson, G. P. Wagner, Uterine gene expression in the live-bearing lizard, *Chalcides ocellatus*, reveals convergence of squamate reptile and mammalian pregnancy mechanisms. *Gen Biol Evol* **4**, 394-411 (2012).
71. C. M. Whittington, O. W. Griffith, W. Qi, M. B. Thompson, A. B. Wilson, Seahorse brood pouch transcriptome reveals common genes associated with vertebrate pregnancy. *Mol Biol Evol* **32**, 3114-3131 (2015).
72. T. E. Spencer, T. R. Hansen, *Implantation and establishment of pregnancy in ruminants*, Regulation of implantation and establishment of pregnancy in mammals (Springer International Publishing, 2015).
73. A. R. Chavan, O. W. Griffith, G. P. Wagner, The inflammation paradox in the evolution of mammalian pregnancy: turning a foe into a friend. *Current opinion in genetics & development* **47**, 24-32 (2017).
74. R. Geisert, A. Fazleabas, M. Lucy, D. Mathew, Interaction of the conceptus and endometrium to establish pregnancy in mammals: role of interleukin 1 $\beta$ . *Cell and tissue research* **349**, 825-838 (2012).
75. T. R. Hansen *et al.*, Mechanism of action on interferon-tau in the uterus during early pregnancy. *Journal of reproduction and fertility* **54**, 329-339 (1999).
76. G. E. Mann, G. E. Lamming, R. S. Robinson, D. C. Wathes, The regulation of interferon-tau production and uterine hormone receptors during early pregnancy. *Journal of reproduction and fertility* **54**, 317-328 (1999).
77. Y. Niwano *et al.*, Suppression of T-Lymphocyte Blastogenesis by Ovine Trophoblast Protein-1 and Human Interferon- $\alpha$  May Be Independent of Interleukin-2 Production. *American Journal of Reproductive Immunology* **20**, 21-26 (1989).
78. T. G. Wegmann, H. Lin, L. Guilbert, T. R. Mosmann, Bidirectional cytokine interactions in the maternal-fetal relationship: is successful pregnancy a TH2 phenomenon? *Immunology today* **14**, 353-356 (1993).
79. U. B. Knudsen, N. Uldbjerg, T. Rechberger, K. Fredens, Eosinophils in human cervical ripening. *Eur J Obstetrics Gynecol Reprod Biol* **72**, 165-168 (1997).
80. K. Chwalisz *et al.*, Pregnancy: Cervical ripening with the cytokines interleukin 8, interleukin 1 $\beta$  and tumour necrosis factor  $\alpha$  in guinea-pigs. *Human Reproduction* **9**, 2173-2181 (1994).
81. Z. Zhang *et al.*, Alternations of IL-6, IL-6R and gp130 in early and late onset severe preeclampsia. *Hypertension in pregnancy* **32**, 270-280 (2013).
82. S. Khanjani *et al.*, NF- $\kappa$ B regulates a cassette of immune/inflammatory genes in human pregnant myometrium at term. *Journal of Cellular and Molecular Medicine* **15**, 809-824 (2011).
83. L. Blanchon *et al.*, Activation of the human pregnancy-specific glycoprotein PSG-5 promoter by KLF4 and Sp1. *Biochem Biophys Res Comm* **343**, 745-753 (2006).

84. G. P. Wagner, K. Kin, L. Muglia, M. Pavlicev, Evolution of mammalian pregnancy and the origin of the decidual stromal cells. *International Journal of Developmental Biology* **58**, 117-126 (2014).
85. S. Tait, R. Tassinari, F. Maranghi, A. Montovani, Bisphenol A affects placental layers morphology and angiogenesis during early pregnancy phase in mice. *J Appl Toxicol* **35**, 1278-1291 (2015).
86. A. Mould, M. A. Morgan, L. Li, E. K. Bikoff, E. J. Robertston, Blimp1/Prdm1 governs terminal differentiation of endovascular trophoblast giant cells and defines multipotent progenitors in the developing placenta. *Genes & development* **26**, 2063-2074 (2012).
87. D. Sezen *et al.*, Gelsolin down-regulated lipopolysaccharide-induced intraamniotic tumor necrosis factor- $\alpha$  production in the midtrimester of pregnancy. *American J Obstetrics Gynecol* **200**, 191.e191-191.e194 (2009).
88. M. M. Joyce *et al.*, Pig Conceptuses Increase Uterine Interferon-Regulatory Factor 1 (IRF1), but Restrict Expression to Stroma Through Estrogen-Induced IRF2 in Luminal Epithelium. *Biology of Reproduction* **77**, 292-302 (2007).
89. S. P. Murphy *et al.*, Interferon gamma in successful pregnancies. *Biology of reproduction* **80**, 848-859 (2009).
90. P. Jeyasuria, J. Wetzel, M. Bradley, K. Subedi, J. C. Condon, Progesterone-regulated caspase 3 action in the mouse may play a role in uterine quiescence during pregnancy through fragmentation of uterine myocyte contractile proteins. *Biol Reprod* **928-934** (2009).
91. L. M. Clover, I. L. Sargent, A. Townsend, R. Tampe, C. W. G. Redman, Expression of TAP1 by human trophoblast. *Eur J Immunol* **25**, 543-548 (1995).
92. X. Zhang *et al.*, Ovarian stimulation retards postimplantation development and alters global gene expression profile of blastocysts in mouse . *Fertility and Sterility* **93**, 2770-2773 (2010).
93. D. R. Bainbridge, S. A. Ellis, I. L. Sargent, The short forms of HLA-G are unlikely to play a role in pregnancy because they are not expressed at the cell surface. *Journal of reproductive immunology* **47**, 1-16 (2000).
94. L. Przybyl *et al.*, Cd74-dysregulation of Macrophage-trophoblastic Interactions in the Preeclamptic Placenta. *Hypertension* **66**, A042 (2015).
95. A. Franczak, B. Wojciechowicz, G. Kotwica, Transcriptomic analysis of the porcine endometrium during early pregnancy and the estrous cycle. *Reproductive Biology* **13**, 229-237 (2013).
96. S. E. Ulbrich *et al.*, Quantitative characterization of prostaglandins in the uterus of early pregnant cattle. *Reproduction* **138**, 371-382 (2009).
97. M. O. Atli, A. Guzeloglu, D. Ali Dinc, Expression of wingless type (WNT) genes and their antagonists at mRNA levels in equine endometrium during the estrous cycle and early pregnancy. *Animal Reprod Sci* **125**, 94-102 (2011).
98. M. Arianmanesh, R. H. McIntosh, R. G. Lea, P. A. Fowler, K. H. Al-Gubory, Ovine corpus luteum proteins, with functions including oxidative stress and lipid metabolism, show complex alterations during implantation. *J Endocrinol* **210**, 47-58 (2011).
99. D. Mao *et al.*, ATF3 expression in the corpus luteum: possible role in luteal regression. *Molecular Endocrinology* **27**, 2066-2079 (2013).
100. S. A. Khan, G. M. Stancel, *Protooncogenes and growth factors in steroid hormone-induced growth and differentiation* (CRC press London, 1993).
101. E. Chung, F. Yeung, L. A. Leinwand, Calcineurin activity is required for cardiac remodelling in pregnancy. *Cardiovasc Res* **100**, 402-410 (2013).
102. K. Shirasuna *et al.*, NLRP3 deficiency improves angiotensin II-induced hypertension but not fetal growth restriction during pregnancy. *Endocrinol* **156**, 4281-4292 (2015).

103. T. Shimizu *et al.*, Actions and interactions of progesterone and estrogen on transcriptome profiles of the bovine endometrium. *Physiological genomics* **42**, 290-300 (2010).
104. D. Le Roith, The Insulin-Like Growth Factor System. *Experimental Diabetes Research* **4**, 205-212 (2003).
105. S. M. Firth, R. C. Baxter, Cellular Actions of the Insulin-Like Growth Factor Binding Proteins. *Endocrine Reviews* **23**, 824-854 (2002).
106. K. Sun, K. Yang, J. R. Challis, Regulation of 11 $\beta$ -hydroxysteroid dehydrogenase type 2 by progesterone, estrogen, and the cyclic adenosine 5'-monophosphate pathway in cultured human placental and chorionic trophoblasts. *Biology of Reproduction* **58**, 1379-1384 (1998).
107. P. M. Coan *et al.*, Adaptations in placental phenotype support fetal growth during undernutrition of pregnant mice. *The Journal of Physiology* **588**, 527-538 (2010).
108. M. F. Romero, w. C. M. Fulton, W. F. Boron, The SLC4 family of HCO<sub>3</sub>-transporters. *Pflügers Arch* **447**, 495-509 (2004).
109. E. D. Watson, J. C. Cross, Development of structures and transport functions in the mouse placenta. *Physiology* **20**, 180-193 (2005).
110. A. Moffett, C. Loke, Immunology of placentation in eutherian mammals. *Nature Reviews Immunology* **6**, 584-594 (2006).
111. J. Sonanez-Organis, M. Hernandez-Palomares, A. Virgen-Ortiz, J. Rosas-Rodriguez, R. Ortiz, Pregnancy up-regulates genes involved in glucose and lipid metabolism in the left ventricle of rat. *FASEB J* **29**, LB576 (2015).
112. D. Zhang, Y.-J. Tan, F. Qu, J. k.-Z. Sheng, H. F. Huang, Functions of water channels in male and female reproductive systems. *Water Channel Prot*, 676-690 (2012).
113. P. Cunningham, L. McDermott, Long chain PUFA transport in human term placenta. *The Journal of Nutrition* **139**, 636-639 (2009).
114. D. Leger, B. Campoin, J. P. Decottignies, J. Montreuil, G. Spik, Physiological significance of the marked increased branching of the glycans of human serotransferring during pregnancy. *Biochem J* **257**, 231-238 (1989).
115. Y. Zhang, N. Zhao, H. Zhao, Y. Cui, J. Liu, Expression of tight junction factors in human placental tissues derived from assisted reproductive technology and natural pregnancy. *Europe PMC* **49**, 125-129 (2014).
116. O. Vaughan, A. Sferruzzi-Perri, A. Fowden, Maternal corticosterone regulates amino acid allocation to fetal growth in mice. *Endocrine Abstracts* **31**, 289 (2013).
117. F. W. Bazer *et al.*, Select nutrients in the uterine lumen of sheep and pigs affect conceptus development. *J Reprod Dev* **58**, 180-188 (2012).
118. L. A. Okumu *et al.*, Endometrial expression of progesterone-induced blocking factor and galectins-1,-3,-9, and 3-binding protein in the luteal phase and early pregnancy in cattle. *Physiological genomics* **43**, 903-910 (2011).
119. W. Ma, C. Baumann, M. M. Viveiros, Lack of protein kinase C-delta (PKC $\delta$ ) disrupts fertilization and embryonic development. *Molecular reproduction and development* **82**, 797-808 (2015).
120. M. Santhanakrishnan, K. Ray, K. Oppenheimer, E. A. Bonney, Dynamic regulation of alpha-dystroglycan in mouse placenta. *Placenta* **29**, 932-936 (2008).
121. J. M. Stoler *et al.*, Separation of amniotic membranes after amniocentesis in an individual with the classic form of EDS and haploinsufficiency for COL5A1 expression. *American journal of medical genetics* **101**, 174-177 (2001).
122. C. G. Bönnemann, The collagen VI-related myopathies: muscle meets its matrix. *Nature Reviews Neurology* **7**, 379 (2011).

123. C. Agca, Y. Agca, Molecular and ultrastructural changes of rat pre-implantation embryos during two-cell developmental arrest. *Journal of assisted reproduction and genetics* **31**, 767-780 (2014).
124. A. El-Sayet *et al.*, Large-scale transcriptional analysis of bovine embryo biopsies in relation to pregnancy success after transfer to recipients. *Physiological genomics* **28**, 84-96 (2006).
125. Y. Lee *et al.*, Interactions between inflammatory signals and the progesterone receptor in regulating gene expression in pregnant human uterine myocytes. *J Cell Mol Med* **16**, 1487-2503 (2012).
126. K. M. Downs, J. McHugh, A. J. Copp, E. Shtivelman, Multiple developmental roles of Ahnak are suggested by localization to sites of placentation and neural plate fusion in the mouse conceptus. *Mechanisms of development* **119**, S31-S38 (2002).
127. Z. Zhou *et al.*, The proprotein convertase furin in human trophoblast: possible role in promoting trophoblast cell migration and invasion. *Placenta* **30**, 929-938 (2009).
128. Y. Yamaguchi *et al.*, Changes in the distribution of fibronectin in the placenta during normal human pregnancy. *American journal of obstetrics and gynecology* **152**, 715-718 (1975).
129. J. S. Hunt, J. L. Pace, R. M. Gill, Immunoregulatory molecules in human placentas: potential for diverse roles in pregnancy. *Journal of Developmental Biology* **54**, 457-467 (2009).
130. S. Bauersachs, K. Mitko, S. E. Ulbrich, H. Blum, E. Wolf, Transcriptome studies of bovine endometrium reveal molecular profiles characteristic for specific stages of estrous cycle and early pregnancy. *Exp Clin Endocrinol Diabetes* **116**, 1-14 (2008).
131. T. Workalemahu *et al.*, Genome-wide and candidate gene association studies of placental abruption. *International journal of molecular epidemiology and genetics* **4**, 128 (2013).
132. J. P. Boisseau, Prolactin et l'incubation chez l'hippocampe. *Comp Rend Acad Sci Paris* **177**, 205-215 (1969).
133. S. Renaud, P. Gautheron, Role of platelet factor 3 in the hypercoagulability induced by pregnancy and oral contraceptives. *Thrombosis and Haemostasis* **30**, 299-306 (1973).
134. G. T. Colbern, M. H. Chiang, E. K. Main, Expression of the nonclassical histocompatibility antigen HLA-G by preeclamptic placenta. *American journal of obstetrics and gynecology* **170**, 1244-1250 (1994).
135. E. Crosley, M. Elliot, J. Christians, B. Crespi, Placental invasion, preeclampsia risk and adaptive molecular evolution at the origin of the great apes: evidence from genome-wide analyses. *Placenta* **34**, 127-132 (2013).
136. I. J. Elenkov *et al.*, IL-12, TNF- $\alpha$ , and hormonal changes during late pregnancy and early postpartum: implications for autoimmune disease activity during these times. *The Journal of Clinical Endocrinology & Metabolism* **86**, 4933-4938 (2001).
137. J. D. Aplin, C. J. Jones, Fucose, placental evolution and the glycode. *Glycobiology* **22**, 470-478 (2011).
138. F. Li, J. Liu, E.-S. Park, M. Jo, T. E. Curry Jr, The B cell translocation gene (BTG) family in the rat ovary: hormonal induction, regulation, and impact on cell cycle kinetics. *Endocrinology* **150**, 3894-3902 (2009).
139. M. Breuiller-Fouche, G. Charpigny, G. Germain (2007) Functional genomics of the pregnant uterus: from expectations to reality, a compilation of studies in the myometrium. in *BMC pregnancy and childbirth* (BioMed Central), p S4.
140. Q. E. Yang, M. I. Giassetti, A. D. Ealy, Fibroblast growth factors activate mitogen-activated protein kinase pathways to promote migration in ovine trophoblast cells. *Reproduction*, REP-10-0541 (2011).



141. X. Wang *et al.*, Functional role of arginine during the peri-implantation period of pregnancy. I. Consequences of loss of function of arginine transporter SLC7A1 mRNA in ovine conceptus trophoctoderm. *The FASEB Journal* **28**, 2852-2863 (2014).
142. S. Betscha *et al.*, Transcriptome profile of bovine elongated conceptus obtained from SCNT and IVP pregnancies. *Molecular reproduction and development* **80**, 315-333 (2013).
143. S. H. Zeisel, Importance of methyl donors during reproduction-. *The American journal of clinical nutrition* **89**, 673S-677S (2008).
144. D. S. Iravathy Goud Kalal, A. Panda, Y. Nitschke, F. Rutsch, Molecular diagnosis of generalized arterial calcification of infancy (GACI). *Journal of cardiovascular disease research* **3**, 150 (2012).
145. O. Kohannim, J. Peredo, K. M. Dipple, F. Quintero-Rivera, Clinical Findings Associated with a De Novo Partial Trisomy 10p11. 22p15. 3 and Monosomy 7p22. 3 Detected by Chromosomal Microarray Analysis. *Case reports in genetics* **2011** (2011).
146. S. Bauersachs, E. Wolf, Transcriptome analyses of bovine, porcine and equine endometrium during the pre-implantation phase. *Animal reproduction science* **134**, 84-94 (2012).
147. S. M. Waters, G. S. Coyne, D. A. Kenny, D. G. Morris, Effect of dietary n-3 polyunsaturated fatty acids on transcription factor regulation in the bovine endometrium. *Molecular biology reports* **41**, 2745-2755 (2014).
148. J. M. P. Pabona, Z. Zeng, F. A. Simmen, R. C. Simmen, Functional differentiation of uterine stromal cells involves cross-regulation between bone morphogenetic protein 2 and Kruppel-like factor (KLF) family members KLF9 and KLF13. *Endocrinology* **151**, 3396-3406 (2010).
149. T. Shindo *et al.*, ADAMTS-1: a metalloproteinase-disintegrin essential for normal growth, fertility, and organ morphology and function. *The Journal of clinical investigation* **105**, 1345-1352 (2000).
150. M. Ostrowska, B. Ž. Górká, K. Słoniewski, L. Z. Kowalski, Expression of PC, PCK1, PCK2, LDHB, FBP1 and G6PC genes in the liver of cows in the transition from pregnancy to lactation. *Animal Science Papers and Reports* **31**, 281-290 (2013).
151. V. Maillo *et al.*, Oviduct-embryo interactions in cattle: two-way traffic or a one-way street? *Biology of reproduction* **92**, 144, 141-148 (2015).
152. M. Eghbali *et al.*, Molecular and functional signature of heart hypertrophy during pregnancy. *Circulation research* **96**, 1208-1216 (2005).
153. J. Zheng, M. L. Johnson, D. A. Redmer, L. P. Reynolds, Estrogen and progesterone receptors, cell proliferation, and c-fos expression in the ovine uterus during early pregnancy. *Endocrinology* **137**, 340-348 (1996).
154. A. El-Sayed *et al.*, Large-scale transcriptional analysis of bovine embryo biopsies in relation to pregnancy success after transfer to recipients. *Physiological genomics* (2017).
155. M. C. Rudolph, J. L. McManaman, L. Hunter, T. Phang, M. C. Neville, Functional development of the mammary gland: use of expression profiling and trajectory clustering to reveal changes in gene expression during pregnancy, lactation, and involution. *Journal of mammary gland biology and neoplasia* **8**, 287-307 (2003).
156. A. Larsson, M. Palm, S. Basu, O. Axelsson, Insulin-like growth factor binding protein-1 (IGFBP-1) during normal pregnancy. *Gynecological Endocrinology* **29**, 129-132 (2013).
157. O. Shynlova, P. Tsui, A. Dorogin, B. L. Langille, S. J. Lye, The expression of transforming growth factor  $\beta$  in pregnant rat myometrium is hormone and stretch dependent. *Reproduction* **134**, 503-511 (2007).

158. Y. W. Chan, H. A. Berg, J. D. Moore, S. Quenby, A. M. Blanks, Assessment of myometrial transcriptome changes associated with spontaneous human labour by high-throughput RNA-seq. *Experimental physiology* **99**, 510-524 (2014).
159. C. Méhats *et al.*, Pregnancy induces a modulation of the cAMP phosphodiesterase 4-conformers ratio in human myometrium: consequences for the utero-relaxant effect of PDE4-selective inhibitors. *Journal of Pharmacology and Experimental Therapeutics* **292**, 817-823 (2000).
160. M. Chauhan, U. Yallampalli, Y.-L. Dong, G. D. Hankins, C. Yallampalli, Expression of adrenomedullin 2 (ADM2)/intermedin (IMD) in human placenta: role in trophoblast invasion and migration. *Biology of reproduction* **81**, 777-783 (2009).
161. H. Stepan, C. Leo, S. Purz, M. Höckel, L.-C. Horn, Placental localization and expression of the cell death factors BNip3 and Nix in preeclampsia, intrauterine growth retardation and HELLP syndrome. *European Journal of Obstetrics & Gynecology and Reproductive Biology* **122**, 172-176 (2005).
162. D. A. Enquobahrie, C. Qiu, S. Y. Muhie, M. A. Williams, Maternal peripheral blood gene expression in early pregnancy and preeclampsia. *International journal of molecular epidemiology and genetics* **2**, 78 (2011).
163. M. Waters, P. Kaye, The role of growth hormone in fetal development. *Growth Hormone & IGF Research* **12**, 137-146 (2002).
164. H. D. Mistry *et al.*, Differential expression and distribution of placental glutathione peroxidases 1, 3 and 4 in normal and preeclamptic pregnancy. *Placenta* **31**, 401-408 (2010).
165. N. Mansouri-Attia *et al.*, Endometrium as an early sensor of in vitro embryo manipulation technologies. *Proceedings of the National Academy of Sciences* **106**, 5687-5692 (2009).
166. T. Gu *et al.*, Endometrial gene expression profiling in pregnant Meishan and Yorkshire pigs on day 12 of gestation. *BMC genomics* **15**, 156 (2014).
167. S. Garcia-Herrero *et al.*, The transcriptome of spermatozoa used in homologous intrauterine insemination varies considerably between samples that achieve pregnancy and those that do not. *Fertility and sterility* **94**, 1360-1373 (2010).
168. C. Le Van Kim, Y. Colin, J.-P. Cartron, Rh proteins: key structural and functional components of the red cell membrane. *Blood reviews* **20**, 93-110 (2006).
169. G. A. Johnson *et al.* (2010) *Glucose, Amino Acids, and Their Transporters in Pig Uteri, Conceptuses, and Placentae.* (Oxford University Press).
170. X.-L. Cui, B. Chang, L. Myatt, Expression and distribution of NADPH oxidase isoforms in human myometrium—role in angiotensin II-induced hypertrophy. *Biology of reproduction* **82**, 305-312 (2010).
171. L. Grande, An empirical synthetic pattern study of gars (Lepisosteiformes) and closely related species, based mostly on skeletal anatomy. The resurrection of Holostei. *Copeia* **10**, 1 (2010).
172. R. E. Broughton, R. Betancur-R, C. Li, G. Arratia, G. Ortí, Multi-locus phylogenetic analysis reveals the pattern and tempo of bony fish evolution. *PLoS currents* **5** (2013).
173. A. S. Woodward, *Catalogue of the fossil fishes in the British Museum (Natural History)* (British Museum, 1895), vol. 3.
174. C. C. Wendling, A. Piecyk, D. Refardt, O. Roth, Tripartite species interaction: phage susceptible bacterial phenotypes show higher virulence against eukaryotic hosts. *In review* (2015).
175. E. Wiley, G. D. Johnson, A teleost classification based on monophyletic groups. *Origin and phylogenetic interrelationships of teleosts* (2010).
176. X. Zou *et al.*, Ammonoids from the Zhuganpo Member of the Falang Formation at Nimaigu and their relevance for dating the Xingyi fossil-lagerstätte (late Ladinian,

- Guizhou, China). *Rivista Italiana di Paleontologia e Stratigrafia (Research In Paleontology and Stratigraphy)* **121** (2015).
177. M. J. Benton *et al.*, Constraints on the timescale of animal evolutionary history. *Palaeontologia Electronica* **18**, 1-106 (2015).
  178. X. Wang, Y. Wang, F. Jin, X. Xu, Y. Wang (1999) Vertebrate assemblages of the Jehol biota in western Liaoning, China. in *Seventh Annual Meeting of the Chinese Society of Vertebrate Paleontology*, pp 1-12.
  179. J. E. O'Reilly, M. dos Reis, P. C. Donoghue, Dating tips for divergence-time estimation. *Trends in Genetics* **31**, 637-650 (2015).
  180. Z. Zhonghe, Evolutionary radiation of the Jehol Biota: chronological and ecological perspectives. *Geological Journal* **41**, 377-393 (2006).
  181. G. Arratia, The Clupeocephala re-visited: analysis of characters and homologies. *Rev Biol Mar Oceanog* **45**, 635-657 (2010).
  182. F. Santini, L. J. Harmon, G. Carnevale, M. E. Alfaro, Did genome duplication drive the origin of teleosts? A comparative study of diversification in ray-finned fishes. *BMC evolutionary biology* **9**, 194 (2009).
  183. S. Wenz *et al.*, L'ichthyofaune des calcaires lithographiques du Kimméridgien supérieur de Cerin (Ain, France). *Geobios* **27**, 61-70 (1994).
  184. M. P. Davis, C. Fielitz, Estimating divergence times of lizardfishes and their allies (Euteleostei: Aulopiformes) and the timing of deep-sea adaptations. *Molecular Phylogenetics and Evolution* **57**, 1194-1208 (2010).
  185. A. Blanco, M. Szabó, À. Blanco-Lapaz, J. Marmi, Late Cretaceous (Maastrichtian) Chondrichthyes and Osteichthyes from northeastern Iberia. *Palaeogeography, Palaeoclimatology, Palaeoecology* **465**, 278-294 (2017).
  186. V. Fondevilla, J. Dinarès-Turell, O. Oms, The chronostratigraphic framework of the South-Pyrenean Maastrichtian succession reappraised: Implications for basin development and end-Cretaceous dinosaur faunal turnover. *Sedimentary geology* **337**, 55-68 (2016).
  187. A. Filleul, J. G. Maisey, Redescription of *Santanichthys diasii* (Otophysi, Characiformes) from the Albian of the Santana Formation and comments on its implications for otophysan relationships. *American Museum Novitates*, 1-21 (2004).
  188. O. Otero, X. Valentin, G. Garcia, Cretaceous characiform fishes (Teleostei: Ostariophysii) from Northern Tethys: description of new material from the Maastrichtian of Provence (Southern France) and palaeobiogeographical implications. *Geological Society, London, Special Publications* **295**, 155-164 (2008).
  189. M. E. Alfaro *et al.*, Nine exceptional radiations plus high turnover explain species diversity in jawed vertebrates. *Proceedings of the National Academy of Sciences* **106**, 13410-13414 (2009).
  190. U. Heimhofer *et al.*, Isotope and elemental geochemistry of black shale-hosted fossiliferous concretions from the Cretaceous Santana Formation fossil Lagerstätte (Brazil). *Sedimentology* **64**, 150-167 (2017).
  191. D. Arcila *et al.*, Genome-wide interrogation advances resolution of recalcitrant groups in the tree of life. *Nature Ecology & Evolution* **1**, 0020 (2017).
  192. M. A. Campbell, M. E. Alfaro, M. Belasco, J. A. López, Early-branching euteleost relationships: areas of congruence between concatenation and coalescent model inferences. *PeerJ* **5**, e3548 (2017).
  193. G. D. Johnson, C. Patterson, Relationships of lower euteleostean fishes. *Interrelationships of fishes* (1996).
  194. M. V. Wilson, D. B. Brinkman, A. G. Neuman, Cretaceous Esocoidei (Teleostei): early radiation of the pikes in North American fresh waters. *Journal of Paleontology* **66**, 839-846 (1992).

195. T. H. Payenberg, D. R. Braman, D. W. Davis, A. D. Miall, Litho-and chronostratigraphic relationships of the Santonian Campanian Milk River Formation in southern Alberta and Eagle Formation in Montana utilising stratigraphy, U Pb geochronology, and palynology. *Canadian Journal of Earth Sciences* **39**, 1553-1577 (2002).
196. M. V. WILSON, G.-Q. Li, Osteology and systematic position of the Eocene salmonid† *Eosalmo driftwoodensis* Wilson from western North America. *Zoological Journal of the Linnean Society* **125**, 279-311 (1999).
197. P. T. Moss, D. R. Greenwood, S. B. Archibald, Regional and local vegetation community dynamics of the Eocene Okanagan Highlands (British Columbia Washington State) from palynology. *Canadian Journal of Earth Sciences* **42**, 187-204 (2005).
198. J. J. Eberle, N. Rybczynski, D. R. Greenwood, Early Eocene mammals from the Driftwood Creek beds, Driftwood Canyon Provincial Park, northern British Columbia. *Journal of Vertebrate Paleontology* **34**, 739-746 (2014).
199. K. Dietze, Morphology and phylogenetic relationships of certain neoteleostean fishes from the Upper Cretaceous of Sendenhorst, Germany. *Cretaceous Research* **30**, 559-574 (2009).
200. J. Gaudant, Présence d'un Osmeridae: *Enoplophthalmus schlumbergeri* Sauvage, 1880 dans l'Oligocène inférieur des environs de Céreste (Alpes-de-Haute-Provence, France). *Geodiversitas* **35**, 345-358 (2013).
201. V. Gallo, P. M. Coelho, First occurrence of an aulopiform fish in the Barremian of the Sergipe-Alagoas Basin, northeastern Brazil. *Mesozoic fishes* **4**, 351-371 (2008).
202. M. V. Wilson, A. M. Murray, Early Cenomanian acanthomorph teleost in the Cretaceous Fish Scale Zone, Albian/Cenomanian boundary, Alberta, Canada. *Mesozoic fishes—systematics and paleoecology*, 369-382 (1996).
203. P. L. Forey, L. Yi, C. Patterson, C. E. Davies, Fossil fishes from the Cenomanian (Upper Cretaceous) of Namoura, Lebanon. *Journal of Systematic palaeontology* **1**, 227 (2003).
204. M. Gayet, P. Abi Saad, O. Gaudant, The Fossils of Lebanon. *éditions désiris*. (2012).
205. D. Davesne *et al.*, Early fossils illuminate character evolution and interrelationships of Lampridiformes (Teleostei, Acanthomorpha). *Zoological Journal of the Linnean Society* **172**, 475-498 (2014).
206. K. A. González-Rodríguez, H.-P. Schultze, G. Arratia, M. Wilson, Miniature armored acanthomorph teleosts from the Albian/Cenomanian (Cretaceous) of Mexico. *Mesozoic fishes* **5**, 457e487 (2013).
207. K. A. González-Rodríguez, C. Fielitz, V. M. Bravo-Cuevas, R. E. Baños-Rodríguez, Cretaceous osteichthyan fish assemblages from Mexico. *New Mexico Museum of Natural History and Science Bulletin* **71**, 1-14 (2016).
208. M. G. Newbrey, A. M. Murray, M. V. Wilson, D. B. Brinkman, A. G. Neuman, A new species of the paracanthopterygian Xenyllion (Sphenocephaliformes) from the Mowry Formation (Cenomanian) of Utah, USA. *Mesozoic fishes*, 363-384 (2013).
209. J. Stewart, Cretaceous acanthomorphs of North America. *Mesozoic Fishes—Systematics and Paleoecology*, 383-394 (1996).
210. R. W. Scott, F. Oboh-Ikuenobe, D. G. Benson, J. M. Holbrook, Numerical age calibration of the Albian/Cenomanian boundary. (2009).
211. L. Jacobs, K. Ferguson, M. Polcyn, C. Rennison, Cretaceous  $\delta^{13}\text{C}$  stratigraphy and the age of dolichosaurs and early mosasaurs. *Netherlands Journal of Geosciences* **84**, 257-268 (2005).
212. C. Patterson, An overview of the early fossil record of acanthomorphs. *Bulletin of Marine Science* **52**, 29-59 (1993).

213. A. M. Murray, M. V. Wilson, Contributions of fossils to the phylogenetic relationships of the percopsiform fishes (Teleostei: Paracanthopterygii): order restored. *Mesozoic fishes* **2**, 397-411 (1999).
214. A. M. Murray, A new Paleocene genus and species of percopsid, † *Massamorichthys wilsoni* (Paracanthopterygii) from Joffre Bridge, Alberta, Canada. *Journal of Vertebrate Paleontology* **16**, 642-652 (1996).
215. L. J. Noorbergen *et al.* (2015) Integrated stratigraphy of Paleocene lignite seams of the fluvial Tullock Formation, Montana (USA). in *EGU General Assembly Conference Abstracts*.
216. D. Davesne, G. Carnevale, M. Friedman, *Bajaichthys elegans* from the Eocene of Bolca (Italy) and the overlooked morphological diversity of Zeiformes (Teleostei, Acanthomorpha). *Palaeontology* **60**, 255-268 (2017).
217. J. C. Tyler, F. Santini, A phylogeny of the fossil and extant zeiform-like fishes, Upper Cretaceous to Recent, with comments on the putative zeomorph clade (Acanthomorpha). *Zoologica Scripta* **34**, 157-175 (2005).
218. M. Schlüter, T. Steuber, M. Parente, Chronostratigraphy of Campanian–Maastrichtian platform carbonates and rudist associations of Salento (Apulia, Italy). *Cretaceous Research* **29**, 100-114 (2008).
219. W.-J. Chen *et al.*, New insights on early evolution of spiny-rayed fishes (Teleostei: Acanthomorpha). *Frontiers in Marine Science* **1**, 53 (2014).
220. A. Rosenkrantz, *Marine Upper Cretaceous and lowermost Tertiary deposits in west Greenland: Investigations before and since 1938* (Fr. Bagges Kgl. Hofbogtrykkeri, 1970).
221. G. Dam *et al.*, Lithostratigraphy of the Cretaceous–Paleocene Nuussuaq Group, Nuussuaq Basin, West Greenland. *Geological Survey of Denmark and Greenland Bulletin* **19**, 171 (2009).
222. D. E. Rosen, C. Patterson, *The structure and relationships of the paracanthopterygian fishes* (1969).
223. D. Cohen (1984) Gadiformes: Overview. in (HG Moser, WJ Richards ed.) *Ontogeny and systematics of fishes*. Spec. Publ. No 1, American Society of Ichthyologists and Herpetologists. (and Allen Press, Lawrence, Kansas).
224. J. T. Eastman, L. Grande, Late Eocene gadiform (Teleostei) skull from Seymour Island, Antarctic Peninsula. *Antarctic Science* **3**, 87-95 (1991).
225. H. Endo, Phylogeny of the order gadiformes (Teleostei, Paracanthopterygii). *Memoirs of the Graduate School of Fisheries Sciences, Hokkaido University* **49**, 75-149 (2002).
226. J. Kriwet, T. Hecht, A review of early gadiform evolution and diversification: first record of a rattail fish skull (Gadiformes, Macrouridae) from the Eocene of Antarctica, with otoliths preserved in situ. *Naturwissenschaften* **95**, 899-907 (2008).
227. D. G. Johnson, C. Patterson, Percomorph phylogeny: a survey of acanthomorphs and a new proposal. *Bulletin of Marine Science* **52**, 554-626 (1993).
228. J. C. Tyler, L. Sorbini, New superfamily and three new families of tetraodontiform fishes from the Upper Cretaceous: the earliest and most morphologically primitive plectognaths. (1996).
229. M. Miya, T. P. Satoh, M. Nishida, The phylogenetic position of toadfishes (order Batrachoidiformes) in the higher ray-finned fish as inferred from partitioned Bayesian analysis of 102 whole mitochondrial genome sequences. *Biological Journal of the Linnean Society* **85**, 289-306 (2005).
230. J. A. Moore, Phylogeny of the Trachichthyiformes (Teleostei: Percomorpha). *Bulletin of Marine Science* **52**, 114-136 (1993).
231. J. Alvarado-Ortega, B. A. Than-Marchese, The first record of a North American Cenomanian Trachichthyidae fish (acanthomorpha, acanthopterygii), *Pepemkay maya*,

- gen. et sp. nov., from El Chango quarry (Sierra Madre Formation), Chiapas, Mexico. *Journal of Vertebrate Paleontology* **33**, 48-57 (2013).
232. A. M. Murray, Mid-Cretaceous acanthomorph fishes with the description of a new species from the Turonian of Lac des Bois, Northwest Territories, Canada. *Vertebrate Anatomy Morphology Palaeontology* **1**, 101-115 (2016).
233. J. Nelson, Fishes of the world. Hoboken, New Jersey: John Wiley and Sons, Inc., 601 p. (2006).
234. M. Friedman, Ecomorphological selectivity among marine teleost fishes during the end-Cretaceous extinction. *Proceedings of the National Academy of Sciences* **106**, 5218-5223 (2009).
235. C. Aramburg, Résultats scientifiques de la mission C. Arambourg en Syrie et en Iran (1938-1939). II. Les poissons Oligocènes de l'Iran. Notes et Mémoires sur le Moyen-Orient. (1967).
236. A. Dornburg *et al.*, Molecular phylogenetics of squirrelfishes and soldierfishes (Teleostei: Beryciformes: Holocentridae): Reconciling more than 100 years of taxonomic confusion. *Molecular phylogenetics and Evolution* **65**, 727-738 (2012).
237. F. Santini, J. C. Tyler, A phylogeny of the families of fossil and extant tetraodontiform fishes (Acanthomorpha, Tetraodontiformes), Upper Cretaceous to Recent. *Zoological Journal of the Linnean Society* **139**, 565-617 (2003).
238. G. Howes, Notes on the anatomy and classification of ophidiiform fishes with particular reference to the abyssal genus *Acanthonus* Gunther, 1878. *Bull Br Mus Nat Hist (Zool)* **52**, 95-131 (1992).
239. G. Carnevale, G. D. Johnson, A Cretaceous cusk-eel (Teleostei, Ophidiiformes) from Italy and the Mesozoic diversification of percomorph fishes. *Copeia* **103**, 771-791 (2015).
240. G. Carnevale, B. B. Collette, † *Zappaichthys harzhauseri*, gen. et sp. nov., a new Miocene toadfish (Teleostei, Batrachoidiformes) from the Paratethys (St. Margarethen in Burgenland, Austria), with comments on the fossil record of batrachoidiform fishes. *Journal of Vertebrate Paleontology* **34**, 1005-1017 (2014).
241. J. Hohenegger, S. Ćorić, M. Wagreich, Timing of the middle miocene Badenian stage of the central Paratethys. *Geologica Carpathica* **65**, 55-66 (2014).
242. C. E. Thacker, Phylogeny of Gobioidi and placement within Acanthomorpha, with a new classification and investigation of diversification and character evolution. *Copeia* **2009**, 93-104 (2009).
243. A. F. Bannikov, G. Carnevale, † *Carlomonnius quasigobius* gen. et sp. nov.: the first gobioid fish from the Eocene of Monte Bolca, Italy. *Bulletin of Geosciences* **91**, 13-22 (2016).
244. M. Miya *et al.*, Evolutionary origin of the Scombridae (tunas and mackerels): members of a Paleogene adaptive radiation with 14 other pelagic fish families. *PLoS one* **8**, e73535 (2013).
245. C. Patterson, Osteichthyes: teleostei. *The fossil record* **2**, 621-656 (1993).
246. H. Y. Song *et al.*, Mitogenomic circumscription of a novel percomorph fish clade mainly comprising "Syngnathoidi"(Teleostei). *Gene* **542**, 146-155 (2014).
247. A. Wilson, J. Orr, The evolutionary origins of Syngnathidae: pipefishes and seahorses. *Journal of Fish Biology* **78**, 1603-1623 (2011).
248. J. Kotlarczyk, A. Jerzmańska, E. Świdnicka, T. Wiszniowska (2006) A framework of ichthyofaunal ecostratigraphy of the Oligocene-Early Miocene strata of the Polish Outer Carpathian basin. in *Annales Societatis Geologorum Poloniae*, pp 1-111.
249. L. J. Roe, Phylogenetic and ecological significance of Channidae (Osteichthyes Teleostei) from the Early Eocene Kuldana Formation of Kohat, Pakistan. (1991).

250. P. D. Gingerich, Stratigraphic and micropaleontological constraints on the middle Eocene age of the mammal-bearing Kuldana Formation of Pakistan. *Journal of Vertebrate Paleontology* **23**, 643-651 (2003).
251. H. L. Fierstine, Fossil history of billfishes (Xiphioidei). *Bulletin of Marine Science* **79**, 433-453 (2006).
252. N. G. Muzylev, *Anoksicheskie sobytiya paleotsena–srednego eotsena (Anoxic events of the Paleocene-Middle Eocene)*. . A. Y. Rozanov, M. A. Semikhatov, Eds., *Ekosistemnye perestroiki i evolyutsiya biosfery (Ecosystem restructuring and the evolution of the biosphere)* (Nedra, Moscow, Russia, 1994).
253. P. C. Wainwright *et al.*, The evolution of pharyngognathy: a phylogenetic and functional appraisal of the pharyngeal jaw key innovation in labroid fishes and beyond. *Systematic Biology* **61**, 1001-1027 (2012).
254. J. S. Sparks, W. L. Smith, Phylogeny and biogeography of cichlid fishes (Teleostei: Perciformes: Cichlidae). *Cladistics* **20**, 501-517 (2004).
255. A. M. Murray, The oldest fossil cichlids (Teleostei: Perciformes): indication of a 45 million-year-old species flock. *Proceedings of the Royal Society of London. Series B: Biological Sciences* **268**, 679-684 (2001).
256. T. Harrison *et al.*, "Paleontological investigations at the Eocene locality of Mahenge in north-central Tanzania, East Africa" in *Eocene Biodiversity*. (Springer, 2001), pp. 39-74.
257. W. Leo Smith, P. Chakrabarty, J. S. Sparks, Phylogeny, taxonomy, and evolution of Neotropical cichlids (Teleostei: Cichlidae: Cichlinae). *Cladistics* **24**, 625-641 (2008).
258. P. A. Perez, M. C. Malabarba, C. del Papa, A new genus and species of Heroini (Perciformes: Cichlidae) from the early Eocene of southern South America. *Neotropical Ichthyology* **8**, 631-642 (2010).
259. M. C. Malabarba, L. R. Malabarba, C. D. Papa, *Gymnogeophagus eocenicus*, n. sp.(Perciformes: Cichlidae), an Eocene cichlid from the Lumbrera Formation in Argentina. *Journal of Vertebrate Paleontology* **30**, 341-350 (2010).
